# Supplementary material for: Genesis and Regulatory Wiring of Retroelement-Derived Domesticated Genes: A Phylogenomic Perspective
Source: PubMed Central journal article supplement — Mol Biol Evol. 2013 Jan 24;30(5):1015–31. doi: 10.1093/molbev/mst014 (PMC3670739; doi:10.1093/molbev/mst014), 2013-01-24
Supplement: supp_mst014_Supplementary_Files.pdf [file supp_mst014_Supplementary_Files.pdf]

## **Supplementary File S1. List of 95 analyzed deuterostome genomes.**

### **Echinoderms**

*Strongylocentrotus purpuratus*

### **Hemichordates**

*Saccoglossus kowalevskii*

### **Cephalochordates**

*Branchiostoma floridae*

### **Urochordates**

*Ciona intestinalis*

*Ciona savignyi*

*Oikopleura dioica*

### **Cyclostomes**

*Petromyzon marinus*

### **Cartilaginous fishes**

*Callorhynchus milii*

*Leucoraja erinacea*

### **Actinopterygii**

*Lepisosteus oculatus*

*Danio rerio*

*Dicentrarchus labrax*

*Gadus morhua*

*Gasterosteus aculeatus*

*Haplochromis burtoni*

*Labeotropheus fuelleborni*

*Maylandia zebra*

*Mchenga conophoros*

*Melanochromis auratus*

*Neolamprologus brichardi*

*Nothobranchius furzeri*

*Nothobranchius kuhntae*

*Oreochromis niloticus*

*Oryzias latipes*

*Pundamilia nyererei*

*Rhamphochromis esox*

*Salmo salar*

*Takifugu rubripes*

*Tetraodon nigroviridis*

*Xiphophorus maculatu*

### **Coelacanth**

*Latimeria chalumnae*

### **Amphibians**

Xenopus (Silurana) tropicalis

### **Sauropsids**

#### **lepidosaurs**

Anolis carolinensis

Python molurus

#### **turtles**

Chrysemys picta bellii

Pelodiscus sinensis

#### **archosaurs**

Alligator mississippiensis

Anas platyrhynchos

Gallus gallus

Geospiza fortis

Meleagris gallopavo

Melopsittacus undulatus

Taeniopygia guttata

### **Mammals**

#### **monotremes**

Ornithorhynchus anatinus

#### **marsupials**

Macropus eugenii

Monodelphis domestica

Sarcophilus harrisii

#### **Afrotheria**

Echinops telfairi

Loxodonta africana

Procavia capensis

Trichechus manatus latirostris

#### **Xenarthra**

Choloepus hoffmanni

Dasybus novemcinctus

### **Boreoeutheria**

#### **-Laurasiatheria**

Ailuropoda melanoleuca

Bos indicus

Bos taurus

Bubalus bubalis

Canis lupus

Canis lupus familiaris

Equus caballus

Erinaceus europaeus

Felis catus

Mustela putorius  
Myotis lucifugus  
Odocoileus virginianus  
Ovis aries  
Pteropus vampyrus  
Sorex araneus  
Sus scrofa  
Tursiops truncatus  
Vicugna pacos

**-Euarchontoglires**

Callithrix jacchus  
Cavia porcellus  
Cricetulus griseus  
Daubentonia madagascariensis  
Dipodomys ordii  
Gorilla gorilla  
Heterocephalus glaber  
Homo sapiens  
Ictidomys tridecemlineatus  
Macaca fascicularis  
Macaca mulatta  
Microcebus murinus  
Mus musculus  
Nomascus leucogenys  
Ochotona princeps  
Oryctolagus cuniculus  
Otolemur garnettii  
Pan paniscus  
Pan troglodytes  
Pongo abelii  
Rattus norvegicus  
Saimiri boliviensis boliviensis  
Tarsius syrichta  
Tupaia belangeri

## Supplementary file S2. Full length representatives of Metaviridae clades in Sauropsida

### Chromovirus clade (in lepidosaurs)

>Sphenodon chromovirus-1 (AC154075)

orf1

MRTNEPGSAARLSGAERD SPLRQPLPAI  
EPGPPPPPAQGAGPVRRSQRLEARRQGGACPTKAGAACWAVPVI \*DWPLVRTLWKCSL  
SLKPTCLAVFPVCLRGILRGDCGECSLVSCGVSG\*VRECVGECVSGVSVRPFPPGGGT  
SSPQSERVSARTPCSLGPIPPFLTVP PHHPSPWSKQVERYVVERWAGFP SAHSSAPYDDR  
GLSSRCASPGNGPHTILTGILQCFVPSKSWDAGYPCLTPRIGKTLTYLSPTSLRSTFPNS  
SLTVSPAPIVLP RR VGH LARMSTAQELAEVLVAVRSLAMEMRDVKTQAELENALVAQTT  
TQAQATAAAPAPRAISGEEGAEAGASTPREPKTPPIEKFCGNRHQFQGFIALCELTFSVQ  
PRTYCHDRGRVAFVIGHLGGVALEWATLLKKGKSPLEEDYGDFIREFAYLFDHPRQRDA  
ETAILNIRQ GKQTVVEYTTFRQQLAFELRWSRDALRVI FRKGLNDEIKDQLAFTALPDTW  
EQVSALALQIEDRLAERRQEKRYEYRPTYM PRSTPLPSPIMEGAKNVEPEPMQVGAIRGP  
LSTEEERRRRSRACYCGETSHFIRD CPT RSTSRTPGGNAMGRGAQGGPRP \*

Orf2

MLLLWRNLPLHPGLPDKKHLPNTRGKRHRGPGGTGGTPAMKIIIPSAV  
SPGCRHFRIP LLLLQWQDSCSLVTWALMDSGASSNFIDRSLVCRYRIPTNAKEQPETAHTI  
DGSPLVSGPITQQTALRCSIGNHQERLAFDVVRTPWFQVVLGLPWLQKHDPHIAWTQPQ  
LQWRSPQCLNTCCKT PPSGNMRIIGVTS PERPQIPEEYQDYQDVFSIQAAIALPPHRA  
DCPIDLQPGMEPPYGRYALS NPELKVLRQYLDEALKNGTIRHSSSPAGAPIFFVPPKDG  
GLRPCIDYRGLNATITKNRYPLPIPELLNRLQGACVFSKLDLRGAYNLVVRREGDEWKT  
AFRTHYGHFEYLVMPFGLANAPATFQHLINDILRDLLDLFVVA**Y**LDDILIFSETWELHVD  
HVRQVLQRLRTHHLYCKLEKCAFHVNSIDFLGFVISPEGIRMDPKKTEAIQRWPPPKAVK  
PLQRFLGSANYRYQYIPEYAQITHPLTQLLKKGQNYCWGTRQQQSFLTLKKA FMKAPILR  
HPNFHAPFQVEADASDRALGAVLSQEDPESQHMLPCAYYSRQLTPAEQNYTIFDRELLAI  
RAAFGAWRHYLEGAQHP IKVLT DHKNLTYLQSAQITNGRHARWALFFARFNFTITFRPGK  
FNALADALSRYPEGASADRREQG P L LERKVFAAVIP SQENLQRATERELTAEEDLGSNPG  
QGLLKRERGLVIPP SWQNYILGAHHDAPLAGHPGWNRTLQLIRRNFWWPTLAADVQHYVA  
NCAICARTKVPRQLQAGLLQVVAPPQGPWQRVGLDFIVELPASRGYTVV CVVVDHF TKMA  
HF IACKGLPSAYRTALLFIRHVVKLHGWPLEIISDRGSQFTSRFWKALFTTLRIQIKLTT  
AYHPQANGQVERVNQDLEQYLYRCYINFLQDDWYAWLPLAEFAHNNAPNASLGESPFVNY  
GFHPQIAIPDLPAHVPAAGALIQHIEHAQSIARETLQKSRQSYKRQADKRRRAVKPLKP  
GDYVWISRQHYPQRSRKLSDRYFGPYVPEKQVNEVTYRVTLPKPKLIHPTFHVSLKLR  
AVPELLETEQPCELLPDDSPESQAYEV**Q**A**I**L**D**S**K**R**R**Y**G**K**L**H**Y**L**I**D**W**V**G**Y**G**P**E**E**R**S**W**E**P**A**S**M  
**V**S**A**P**R**L**V**R**L**F**H**R**L**H**E**K**P**G**P**W**R**G**F**R**R**G**A**C**R**G**G**T**V**N**I**R**R**L**R**R**N**H**R**Q**G**G**R**P**A**G**P**P**S**P**P**R**E**A**R**  
MRTNEPGSAARLSGAERD SPLRQPLPAI EPGPPPPPAQGAGPVRRSQRLEARRQGGAC  
PTKAGAACWAVPVI \*

Size of LTRs: 897 bp, 99% ID

ctagtggggagaaccagaggggtgctgatgggtggtggctcatcatcatcccctcaggag  
ctttctt**gtggg**gtgtaaacattagcgcctccggcgcaatcaccgccagggcgcccgcc  
cgcagggccacctccccccccccgggaagcacgcatgcgcaccaacgagcccggaagt  
gcgcccgcttgagcggggctgaaagggattccccgctcaggcaaccacttccggcaata  
gagccagggcccgccgcccgcagcacagggggcgggcctggcccagtagcccgctca  
cagcgcctcgaggcacgccgacagggcgggcctgcccatacaaaagccggcgcccgctgt  
tggggcgtgcccgtgatctgagactggcccctggtgcgacgctgtggaagtgctccctg  
tctctgaaacctacctgtctgtcttcccttctctgcttccctgctgctgaggaatcctgaga  
ggctgtgactgtggtgaggttcccttctgtcttctgcttctgaggagtgagtggtgagtgctgag  
tgctgggagagtgctgagcggagtgctcagtccttccctccccctggggggggaacc  
tctccccacagagcgagagagtgctcagcccgtacccttcttcttgggcccgatccc  
ccttctctcacagttccccacaccatccttccccttggagtaagcaagtggagcgctac  
gtggttgaacggtggcgaggggttccccagtgctcactcttcggcgccctatgatgatagg  
ggcctaagttccaggtgcgcaagcccagggaaacggcccacacactatcctgacgggcatc  
ctccaatgcttctcgtaccgaagagtgggacgcgggttaccctgctccacgccacgc  
atcgggaaaaccttacctacctgtcccctacctctctctgtagatccttccctaactca  
tccctgacagtatcaccggcaccatagtcctccctaggagggtaggacatttagctagg  
**at**gagtagcgcaccaagaattggcagagtagttagcgggtgctgctccttagccatggaa  
M S T A Q E L A E L V L A V R S L A M E  
atcggggacgtaaaaacgaaacagggcgaactagaaaacgccttagtggcacaacgaca  
M R D V K T K Q A E L E N A L V A Q T T

acacaggccaagccacggccgctcctgctccccgggcccataagcggggaagagggg  
T Q A Q A T A A A P A P R A I S G E E G  
gccgaggcaggagcaagtacccccagacaacccaagaccccccatagagaagttctgt  
A E A G A S T P R E P K T P P I E K F C  
gggaatcgacaccaattccaggggttcatcgcttatgaggttgacgttctccgtacaa  
G N R H Q F Q G F I A L C E L T F S V Q  
ccccgaacctactgccacgaccgggacgggtggcctttgttattggccatctgggagga  
P R T Y C H D R G R V A F V I G H L G G  
gtagcgttgggaatgggcccaccactcttcttaaaggtaaaagccctttgctggaggactat  
V A L E W A T T L L K G K S P L L E D Y  
gggactttattagagagttgcctatctttttgaccaccacatcggcagcgggatgagc  
G D F I R E F A Y L F D H P H R Q R D A  
gagacggccattttgaatattcgccagggaaaacagacagtcgtagaatataccactcgt  
E T A I L N I R Q G K Q T V V E Y T T R  
ttccagcagcttgcctttgaattaagatgggtcccggtatgccttactgtaatctttcgg  
F Q Q L A F E L R W S R D A L R V I F R  
aagggttttaaacgacgagattaaggccaacttgcgttcaccgcgctcccagatacctgg  
K G L N D E I K D Q L A F T A L P D T W  
gaacaggtatctgccttgcctcagattgaggaccggctggcagaacgcccagacaagag  
E Q V S A L A L Q I E D R L A E R R Q E  
aaacgctatgaatatcgcccaacgtatgcctcgttcaacaccgctgccaagccccata  
K R Y E Y R P T Y M P R S T P L P S P I  
atggaagggcgaagaacgtggagcctgaacctatgcaggtaggagccatccgaggcccc  
M E G A K N V E P E P M Q V G A I R G P  
ttatcaacagaagaacgcgaacgacgtcgccggctcggggcatgttactactgtggagaa  
L S T E E R E R R R S R A C Y Y C G E  
acctcccacttcatccgggattgcccgacaagaagcacctcccgaacaccagggggaaac  
T S H F I R D C P T R S T S R T P G G N  
gccatgggcccggggggcacaggggggaccggccatgaaatcattccctctgcagtaa  
A M G R G A Q G G P R P \*

aatggaagggggaagaacgtggagcctgaacctatgcaggtaggagccatccgaggccc  
cttatcaacagaagaacgcgaacgacgtcgccggctcggggcatgttactactgtggaga  
M L L L W R  
aacctcccacttcatccgggattgcccgacaagaagcacctcccgaacaccagggggaaa  
N L P L H P G L P D K K H L P N T R G K  
cgccatgggcccggggggcacaggggggaccggccatgaaaatcattccctctgcagta  
R H G P G G T G G T P A M K I I P S A V  
agccccggatgtcggcatttccgcattccgctcctattgcaatggcaagactcctgctcc  
S P G C R H F R I P L L L Q W Q D S C S  
cttgtaacgtgggctctcatggactccggagcctccagcaacttcatcgatcgagcctg  
L V T W A L M D S G A S S N F I D R S L  
gtgtgccgctatcggtaccacgcaaaagaacaaccgggagaccgcccatactatt  
V C R Y R I P T N A K E Q P E T A H T I  
gatggctcccctctggtatcaggacctatcacccaacaactacagccctgcgtttagc  
D G S P L V S G P I T Q Q T T A L R C S  
attggcaaccatcaagaacgactggcctttgatgtagtcggcaccctgggtttcaagtc  
I G N H Q E R L A F D V V R T P W F Q V  
gtcctgggggttaccctggctgcaaaaacatgatccacacatcgccctggaccagccgcaa  
V L G L P W L Q K H D P H I A W T Q P Q  
ctccaatggaggtctccgcagtgcttaacacttgttgaagacaccacccccgctcgga  
L Q W R S P Q C L N T C C K T P P P S G  
aacatgagaataattgggggtcaccagccccgaaaggccccaaataccccagagtaccag  
N M R I I G V T S P E R P Q I P P E Y Q  
gattaccaggacgtgttcagatccaagccgcatagccttaccctccatagggcatat  
D Y Q D V F S I Q A A I A L P P H R A Y  
gattgccctattgacttacaacctggaatggaacccccatacggacggatataatgcctt  
D C P I D L Q P G M E P P Y G R I Y A L  
tccaatccagaactgaaagtcttacgacagctacctggatgaggcattgaagaatgggact  
S N P E L K V L R Q Y L D E A L K N G T  
atccgccattctagctccccgggctggggcccccatatTTTTTgtccctaagaaagatggg  
I R H S S S P A G A P I F F V P K K D G  
ggcctacgccccttgactatcgccgggctaaatgcaatcaccattaaaaatcgttac  
G L R P C I D Y R G L N A I T I K N R Y  
ccgcttcccctcattcctgagctgctcaatcgacttcaagggcctgcgtgttttcgaaa  
P L P L I P E L L N R L Q G A C V F S K  
ttagatttacgtggagcctacaatttagttcgctcctggaaggagatgaatggaaaaag

L D L R G A Y N L V R V R E G D E W K T  
gccttccgaaccctacggccattttgaatatttggttatgccggttcgggttgcaaac  
A F R T P H Y G H F E Y L V M P F G L A N  
gcccgcctacttccagcactcataaacgacattctacgagacttattagacctttt  
A P A T F Q H L I N D I L R D L L D L F  
gtggtcgcctatctggacgacattctcatcttttcagaaacttggaactgcatgtagat  
V V A Y L D D I L I F S E T W E L H V D  
catgtgcccaggtcctccaacgattgcgcaactcatcacttatattgcaaactgaaaa  
H V R Q V L Q R L R T H H L Y C K L E K  
tgtgccttccagtaaacctcattgactttcttgatttgaatttcccagaggggatc  
C A F H V N S I D F L G F V I S P E G I  
cgcatggacccaagaagacggaagccatccagcagtgggccccgccaaggcgtcaag  
R M D P K K T E A I Q R W P P P K A V K  
ccctgcaacgatttctcggtagtgccaattactaccgacaatacatcccggagtatgcc  
P L Q R F L G S A N Y Y R Q Y I P E Y A  
caaataactcatccattgacgcagctatataaaaaaggggcaaaattattggtggggaact  
Q I T H P L T Q L L K K G Q N Y C W G T  
aggcaacagcaaagcttctaactctcaagaaagcctttatgaaggaccgattttgct  
R Q Q Q S F L T L K K A F M K A P I L R  
caccacaattttcatgctcctttccaggtagaagctgacgcttccgatcgagcattagga  
H P N F H A P F Q V E A D A S D R A L G  
gccgtgctctcacaggaagatcctgaatcccagcacatgctcccctgtgcttactattct  
A V L S Q E D P E S Q H M L P C A Y Y S  
aggcaactcagccagcaaaaattataccatctttgatagagattattagccatt  
R Q L T P A E Q N Y T I F D R E L L A I  
agggcagcctttggagcatggcggcattatcttgaaggggccaacatcccataaaggtc  
R A A F G A W R H Y L E G A Q H P I K V  
ctaacagaccataaaaaatcttacctatctacaatccgcacaaatcaccaatgggcgcccac  
L T D H K N L T Y L Q S A Q I T N G R H  
gcgcatgggacactcttcttgacgcttttaatttcaccatcaccttccgacccgggaag  
A R W A L F F A R F N F T I T F R P G K  
ttcaatgccctagcagacgcctatcccgatatccggaaggagcatccgacgatcgcaga  
F N A L A D A L S R Y P E G A S A D R R  
gaacaagggcctcttttagaacggaaggttttcgcccgggttataccctcacaggaaaac  
E Q G P L L E R K V F A A V I P S Q E N  
ctacagcgagccacggagcgggaactcaccgcggaagaggacttgggtagtaaccggga  
L R A T E R E L T A E E D L G S N P G  
cagggactcttaaaaaagagaaggacgactcgtgataccccctcatggcagaactatatac  
Q G L L K R E G R L V I P P S W Q N Y I  
ttagggcgccatgatgcccccttgcgggcatccgggatggaaccgtactctccag  
L G A H H D A P L A G H P G W N R T L Q  
ctaattcgacgcaatttctgggtggccaaccttagcagcggacgttcagcactacgttgcg  
L I R R N F W P T L A A D V Q H Y V A  
aactgcgccatctgcgcccgcagaaagtccacggcaattgcaagccgggcttttaca  
N C A I C A R T K V P R Q L Q A G L L Q  
gtagtcgcacctccacagggccttggcaacgagtggggcttgattttattgtggaatta  
V V A P P Q G P W Q R V G L D F I V E L  
cccgcctcccgtggttacactgtggtgtgctggttagaccattttacaaaaatggca  
P A S R G Y T V V C V V D H F T K M A  
cactttatcgcctgtaaggactcccttccgcttatcgaacagcgcctcctgttcacccg  
H F I A C K G L P S A Y R T A L L F I R  
cacgtagtcaagctgcatgggtggccacttgaatcatcagtgaccggggatctcaattc  
H V V K L H G W P L E I I S D R G S Q F  
acctcgcgattttggaaggcccttttacaacactgcgcattcaaatcaagttaactact  
T S R F W K A L F T T L R I Q I K L T T  
gcttatcaccgcaagccaacggacaagtggagcagtgcaatcaagatcttgagcaatac  
A Y H P Q A N G Q V E R V N Q D L E Q Y  
ttgcgttgctatatcaactttctccaagatgactggtatgctggttccctcttgagag  
L R C Y I N F L Q D D W Y A W L P L A E  
ttcggccacaataatgcccccaacgcatccttgggggaatcccccttctttgtaactat  
F A H N N A P N A S L G E S P F F V N Y  
ggctttcatccccagattgctataccccgaccttctgcaacacacgtccctgctgcagga  
G F H P Q I A I P D L P A T H V P A A G  
gcctaataccaacatataccacgaagcacaagcatagccagagagactctacaaaaatcc  
A L I Q H I H E A Q S I A R E T L Q K S  
cgccaaagttacaaacgacaagccgataaacgcccggagcagtaaaacctcttaacca  
R Q S Y K R Q A D K R R R A V K P L K P  
ggggactacgtatggatctcccgtcagcattacccttccaacgtccctctcgaaacta

G D Y V W I S R Q H Y P S Q R P S R K L  
agtgcagatacttccggaccttaccctgtggaaaaacaagttaatgaggtcacctatcgc  
S D R Y F G P Y P V E K Q V N E V T Y R  
gttacttaccctcaagatcaagatacaccggacctttcacggtttccctcctcaaacgg  
V T L P P K L K I H P T F H V S L L K R  
gctgttccacctgagtaacagaacagccctgcgaactcctccccgatgactccccctgaa  
A V P P E L T E Q P C E L L P D D S P E  
tcgaggcctatgaagtccaagccattttggattccaaacgacgatatgggaaactacat  
S Q A Y E V Q A I L D S K R R Y G K L H  
tacctcattgattgggtaggatattggcctgaagaacgctcatgggaacccgcctccatg  
Y L I D W V G Y G P E E R S W E P A S M  
gtttctgccccgccttgttgcctgtttcacaccggacaccagaaaaaccggacca  
V S A P R L V R L F H T R H P E K P G P  
tggcgaggttttcgacggggggcctgtagggggggtactgtaaacattaggcgcctccgg  
W R G F R R G A C R G G T V N I R R L R  
cgcaatcacccgagggcggccggcccgagggccaccttccccccccgggaagcagcgc  
R N H R Q G G R P A G P P S P P R E A R  
atgcgcaccaacgagcccggaaagtgcggccgcttgagcggggctgaaagggattccccg  
M R T N E P G S A A R L S G A E R D S P  
ctcaggcaaccacttccggcaatagagccaggccccgcgcccgcagcacagggggcg  
L R Q P L P A I E P G P P P P A Q G A  
gggctggcccagtagcgcgctcacagcgcctcgaggcacgcccagggcggggcctgc  
G P G P V R R S Q R L E A R R Q G G A C  
cctacaaaagcggcgcgctgttggcgggtgcccggatctgagactggcccctggtg  
P T K A G A A C W A V P V I \*  
cgcacgctgtggaagtgtcctgtctctgaaacctacctgtcttctgttcccttccct  
gtgtgctgcgaggaatcctgagaggctgtgactgtggtgagtgcttccctgtgtctgt  
ggagtgagtggtgagtgctgctgagtgctgggagagtgctgagcggagtgctcagtcctg  
cccttccccctggggggggaacctcctccccacagagcgagagagtgctcagcccgtacc  
cctgttcccttgggcccgatcccccttccctcacagttccccacaccatccttccct  
tggagtaagcaagtggagcgtacgtggttgaacggtggggcaggggtccccagtgctcac  
tctcggcgcctatgatgatagggcctaagttccaggtgcgcaagcccaggggaacggc  
ccacacactatcctgacgggcatcctccaacgcttctcgtaccgaagagttgggacgcg  
ggttaccgctgcctcacgcccacgcatcgggaaaacccttacctacctgtcccctacctct  
cttcgtacatccttccctaactcatccctgacagtggggtcctgcagggattccatcttg  
tccccactcctgttcaatatgtatttgaggctcctgggcaagattgttcagagatttga  
gggaagtgcctcagtagtgatgacaccaactctctctcttcttctcctctgacca  
ggtcctgcagtcctggtgtttactcaattcctggctgctggtgggactggatgcaggtg  
agctgactgaagctgaatctagacaagaccaaggccttgtagcctgggagatgtaggac  
ccctgttatttatggggtccagactccttggccacttacggttgtagcttggagtgct  
cttgatocattgctgctgctggttaccaggttgtagcaggagcgtttccaccaact  
tcatctggtgagaaggctgtgagcttttttatcagattcggatttggccattgttatca  
aggttttcataactcaaggctagactactgccaagggcactagctaccattggaaaaa  
ggacattcgtcccgggctgtactggctggggggcccagatccaaggtgactaagtca  
cccttccctcccccttttttcttttttaaaatttccacctgaactggctgggggtccttc  
cagctcctgcatgggcccccttctgcatgtggttgcaacattgtgtctgatacaatgtt  
gtaactgcagggcagggagggggagaggcctcatgcagcattctgtgtcaggtagggtggc  
tatacctctcctttaaanaaggatgcttatgaaaaaacatgggtgcagggctgcacgga

>Anolis Chromovirus (AAWZ01021304)

Orf1

MDELRVK

VDQLQTAFTVSQTAQAVKGHVLTTPERFDGTRCKLPTFLAQVELYFSQLSAHAFFPTDTSKV  
AFILSLLTGPAGQWATNLI LGNDPVKDNLNNFKRLLTDTFGDPLRTENAGWALYRLKQ GK  
GTVLDYLNKFNLYRHQLDWGENAFMLLFTAGLSDMLQDELARLEPAESWDALVAKVLRLD  
ARFEARKH SKAMCAPPMHVTRAPVVMGEEPME LGVFKKLPTEEKSRRLQLGLCLYCGNAG  
HFAKSCNVKPSQLSGKQP\*

Orf2

CETFFAFGKRPALVRRESNALGLLQKSTEGRKHFVPIITLSVGGRELVTSLALL  
**DSGAT**VSVYVDIEFAKHKGI PRVRKACDVWVEGADGRLLLETGVVNHETS AVTWEVQVGTGT  
FVWDITSLPRYDVLGMDWLAVVNPQVDWATR KVI LKRQDCCTLNVTHSDMEGVPAEYGE  
FSDVFCRREADKLP PPHRPYDCAIKLAE GAKLPAGRLYALT VPERQALREFLDENLAKGFI  
RPSSSPTAAPVFFVAKKTGELRLVCDYRILNKYTI RDRYPLPLISELLSRVQ GAKVFTKL  
DLRGAYNLIRIREGDEWKTAFNTCFGCHEFRVMPFGLCNAPAVFQRFMNDVFRDLIDQFL  
VI**YLLD**ILIFSKDEK EHRQHVKQVLRHLRANGLFAKASKCVFHVPEVEFLGHVVS GRELK  
MDPHKVD AVNSWQELTKKDVQRFLG FANYREFIPNFAKLT VPLTQLLRKKQPFVWGRE

AHEAFLQLKSSFSQSDNILTHPDVDPFVVEADASSYALGAVLSQKDSSTLRPCGFYSRQ  
LTPFEQNYTIWEKELLAIKVAFEVWRHWLEGARHQIVVRS DHKNLEHLQTAKKLNQRQIR  
WALFFSRFNFKVQFVEGKANLRADALSRKPEFKTNEQVVCQTILPTASL CVVDNELGLHD  
QILEAQKDDVVTQELMLLSAGNRTILPHLQDQDGVLVRRGQVYVPGVTLRLEVIRAHHD  
EPMAGHFGRFKTVQLITRSYWWPKMRQDILRFCDSCAVCQQSKTPVGRPRGLLSSLPVPE  
RPWQIIISMDFISDLPKSGGYTCIWWVVDLFSKLAHFIP CSTIPAAPT LALLFTKHIYRLH  
GAPEVIISDRAPQFVSRFWKHFECLGTLKLVSSAFHPQTDGQSERVNGLLEQYLRCFCL  
DQPTAWVKWLPVAEFAYNNAVHTSSQHTPFELTYGFHPRGGVAPSTNVVSSDPVYRSSEM  
AALHDVARRLLEAKATQKTQADRRHQAGEELEEGDLVWLSKHIKQAGGKFAPRYL**GPF**  
PIVKKISSVAFRLRLPSSLKV**HPVFHRS**LLKLDTSRRGAI AEGIT AASPSSGEEAFVRG  
DSVMI EPHGSVTD RRGRKTPRESDTLEERERKRLRDI FAAPSDEESFEGF TERMEEGLVS  
SEEDMDWTRVREEVGATGHDGTEDEWGPSGLDPWF SWRDGTGSTAGDAVGRSQRCSSSD  
EESDEETPLRRTADSDEDL\*

## **Gmr1 clade** (in all reptiles)

>*Anolis carolinensis* Gmr1 (AAWZ02022550)

MATR

RQKKVAEEEGAFQEESSDSEQTPVSEMTLKYRLEMRKLMQEEEREKEKERELRRELELRRL  
EIELEKQRLTLSQPHINTQEGNSRAEASDMILKRFPRYNKDDVVEKFLISFERCCKDFEV  
SEEKWIYLRPQISGKLEIYGDMSEETHRDYKLFKQVQKQLQTPFEFYLKFRTLKRE  
RNQSFQVASKQAQYFDSWVRTSEVDNYQQLRELMKLEQLFQLVPSYRVLVQDRRPATA  
GEAAVMVDQLITLKEGFRKDEGPSDKQFKLPYHYSQVRTQQGRGAGENTTWRRQEVGTG  
QVKPEEKMKCFQCGLGHLRYQCENLFKKDKTSFFVNKVAVETKAELDTKSKSSPEVVPKE  
KQCLFILSNRPSDYLEYISVDSKNIQGWRTGSDVCIIRPEAVPQKYQHPTSVINLKGL  
GPVLPQVVS LPIEYNGWGIWDFAISSDIPYKCLIGNDLAKEVKNWQKLCEEDKDNFEG  
PTQEAICLPIHQDVGEDPESSSIITEIVNKTEGVREILQEQADETLKPLFKQAENTLES  
AEEQSRFITKDGVLRYRESKSLKTAGESEVHTQIVVPEKFRQLMRVAHDSPOGGHLGIR  
KTTKRITKNFYWPGMFQKIKEFCRSCDTCQRLSTGRDKIKAPLIPMPVIGEPFYRVGIDI  
IGPLCKPSKRGYKIITMIDYATRYPEAVALTNIETSTIANALLSIWGRGTGYPKELVSDL  
GTQFTSKLMKRLLELCGIRHLLTSTAYHPQTNGLVENLNKTLIKMIKSYSQORPHDWDIKL  
QQLLFAYRSVPQDSTGCSPPFELLYGRKARGPLDLVKEYWEASPAEPVPVADYLRDLQST  
MQLAKDITHEHLTAAQQRQKDYDATSKARNFNIGDEVLF LSPNR TNKLQMDWSGPRVVT  
KKHNQVNYDIYNEQLNVERRVHVNMLKPYVWRSANVYIVVSEDESGPFTFWEGDRELYKN  
LDQVEISKELTQSOREEIVGVLNKYSKMFSDLPGRVQGVQHQINTNDAPIASPPYRVTG  
NIKECIEREVKEMLDLGIIVSSNSWASPVLVQKPKDITRFCIDYRLLNKVTQTDTYPM  
PRLLDILLERIGRAFIISSIDLTKGFVQVPMAPQDQPKTAFRTQGGLYEFVLPFGLKNSP  
TTFQRLVDKVLGSLGNFCVAY**YMDD**IGIFSNWEDHLKHLDIVLGRLEAGLTIKASKCKL  
GKTTTKYLGHVLVGGCIRPDSTKVKAIHQWPVPKTKKQVRSFLGLAGYRKFIPSFNLA  
APLSDLTKKKNPNKI IWPNCQTSMDRLKQAITS SVLKAPDFDEPFILTCDASDIGLGA  
VLSQIDKEGEDRPILFLSKKWSHSCSMSTIEKECYSI IWSIRKLPYLWGRKFTLQTDH  
APLKWLDNVKGTNNKLLRWSLSLQDFTYEIKHVTGKRN**VVADALS**RV\*

Size of LTRs: 888 bp, 99% ID

ccctccccctgcaaaaaaccccccaatgaaaaacaagaagtgacctttgaattgtcaaaaaca  
tagtcaactgtatccattggtactcaaaatgacatttatggggaaattttggcaggaatga  
aaacccaatttatcattgtatcttcaaaaacatgtgacagttgagacgatgcagcgtatg  
aaaaaagacatgagaagaggagcaaaagttagtggttagaagtaattttcctgattggcc  
caaaaataattaaaaatatattttggcttcttacacaagaactagagatattattctttg  
aaaatttaattctcaaggagtttaattgggaaatattagcaattttactgcaagaatgtct  
ttgaaaaactgtgtagcttttcacaagaatttggtctgtgtaaaagttattactgtttttt  
caccaaaaaacagcattctctgcagagaagaacacacattttaaaactactatgtctgga  
aaagctgtttttcccaaaaaatgcgaacattttgaaatagacctaaccacatacttttt  
tgcacaggacacattttttctgtacagaaaataatattctgctcagaaatgtctttttt  
tacaagaaaaatgtttctgcacagaaagggctctctgtacatgcatgtgtacatgctt  
atcagcctgtgactattgtgaagaataagctctcaatccagcaagtgagtgagctcca  
ctgttagccccatctctaccaatgtagcagctcgaacatgcaaatgtgagtagatca  
atagagaaaaaaattggaaatc**attttttg**gggagaagtcatagtttattgtgtttaatttt  
tgtctgttggagtggtatattgtgttttagttaacagtagccattttggaaacatgagta  
aagcagcggacattttgtttcatttcacagtggttgggttgccatggagatgaagctggt  
tagctcatgagagagaagtgggcggagccaaggaaaggagagcgggttttttaaaaaaga  
agagaagccagttcagttgggagttgagagttgggagttgagaggggagagtggtgtgga  
gagaaggagaggggtgtgtgtgcatggctgttaggctgttttagtcagaaagtaactgaaa  
agtaggcctggcagagaacctttagtcaggacagactaaggggaaactagtaagatct  
ctagtggggaaaaatctagggatctgggatttgatcggtattggatcaaatatttagtct  
tatcgtagtggggacattgtccacgaaggaactcgactgtggttagggttcgctacaatt



tggtaacatcagtaagaaagtggaagaagatttacaccaaagtctacggttatagagtta  
ttaagccacttgtctatttagagttatataagttaatcaaccaaacccgcaactaagctt  
tgtacaagtaaatgtgtgttattgttaacatctgtctcatctcattccatttgcgtct  
gtggagccaaagtcttagtattaattcaaaaacctcacattgggtggcagataattgaa  
taaatcacacacacagtatataaattgggtggcagcgtatagagatttagtgtaaacacttaa  
gtttagtttacatcttttcaaattgggtgacaggggtgggatctgaaaggcttccctctg  
tctgacaccttttcaaattgggtggcagcggcggttctgtgtaacatccctgatttagtg  
ccttaagattgcttatagaagagaaccgtgaggtaaaatttgacaaaaatggccactaga

M A T R

cgacagaaaaaagtgtgtaagaagaaggtgcatttcaggaagagagttcagattctgaa  
R Q K K V A E E E G A F Q E E S S D S E  
caaacaccagtgtcagaaatgactcttaaatatagactggagatgagaaagttacaaatg  
Q T P V S E M T L K Y R L E M R K L Q M  
gaggaaagagaaaaagaaaaagaaagagaattgaggagagagttggaattaagaagattg  
E E R E K E K E R E L R R E L E L R R L  
gagattgaattgaaaaacagaggttaacactatctcaaccacatatcaataaccaggaa  
E I E L E K Q R L T L S Q P H I N T Q E  
gggaattctagagctgagcatcagacatgattctgaagagattccctagggtataataaa  
G N S R A E A S D M I L K R F P R Y N K  
gacgatgatgtgaaaagtttttaatttcatttgaaagggtgctgtaaggattttgaagtt  
D D D V E K F L I S F E R C C K D F E V  
agtggaggagaagtggtgatttatttgagacctcagattagcgggaaacttttagagatc  
S E E K W M I Y L R P Q I S G K L L E I  
tatggggacatgtctgaggagacctatgggattataaattattcaagcaacaggtgag  
Y G D M S E E T H R D Y K L F K Q Q V Q  
caaaaactccaactaacacctgagttttatagattaaaattcagaacactgaagagagaa  
Q K L Q L T P E F Y R L K F R T L K R E  
agaaatcaaagtttcgctcaggtggcatccaagcaagcacaatattttgacagttgggtg  
R N Q T S F A Q V A S K Q A Q Y F D S W V  
cgaacatctgaggtagataaattcaacaattgaggaggttaattgaaattagaacaatta  
R T S E V D N Y Q Q L R E L M K L E Q L  
tttcagctggtgcctcagaatatcgttggctagtgcaggatcgaagaccagcgacagca  
F Q L V P S E Y R W L V Q D R R P A T A  
ggagaagcggctgtcatggttagatcaattgatcactctgaaggaaggatttaggaaagat  
G E A A V M V D Q L I T L K E G F R K D  
gagggaccaagtataaaaagcagtttaagctgccatattatcattcccaagtagcaacg  
E G P S D K K Q F K L P Y Y H S Q V R T  
cagcaggggagagggcctgcaggagaaaaacaccacctggaggaggcaggaggtaacaggt  
Q Q G R G P A G E N T T W R R Q E V T G  
caagtcaaacctgaagagaaaatgaagtgttttcagtggtgaaagctgggacacttaaga  
Q V K P E E K M K C F Q C G K L G H L R  
tatcagtgtaacctttttaaaggacaagacttctttctttgtaaaataaagtagcagtg  
Y Q C N L F K K T S F F V N K V A V  
gaaaccaaggcagaattagactaagtctaaaagcagccctgaagtagtgcccaaagag  
E T K A E L D T K S K S S P E V V P K E  
aaacaatgtttgtttattttatcaaatagaccatccgaagactattagagtatatttct  
K Q C L F I L S N R P S E D Y L E Y I S  
gttgacagtaagaatatccagggatggagggatactgggtcggatgtttgcatcatacgt  
V D S K N I Q G W R D T G S D V C I I R  
ccagaagcagtaacctcagaatatcaacatcctacctcagtaattaattttaaaggctta  
P E A V P Q K Y Q H P T S V I N L K G L  
ggctctgtaataccaaccaggttagtttcattaccaattgaatacaatggttggaaagga  
G P V I P T Q V V S L P I E Y N G W K G  
atttgggactttgccatcagttcagatataccttataaatgtttaatcggtaacgacctg  
I W D F A I S S D I P Y K C L I G N D L  
gctaaggaagtttaagaactggcagaagttatgtgaggaagataaagataacttcgaaggc  
A K E V K N W Q K L C E E D K D N F E G  
cctactcaggaagcaatatgcttgccaattcatcaggatgtaggagaggatccagaatcc  
P T Q E A I C L P I H Q D V G E D P E S  
agttctataattactgagattgttaacaagacagagggagtttagagaaattctgcaagaa  
S S I I T E I V N K T E G V R E I L Q E  
caaaaaggcagatgaaacctttaaacccttgtttaacaagctgagaatacactagagtca  
Q K A D E C T L K P L F K Q A E N T L E S  
gcagaagaacaaccttctgattcattactaaagatgggtgtgctatatagagagagtaaa  
A E E Q P S R F I T K D G V L Y R E S K  
agtctaaagacagcaggagagtcagaggtgcatacccaattgttagtgccagagaaattc  
S L K T A G E S E V H T Q I V V P E K F  
agagaacaactcatgaggggtggcagatgatagccctcagggaggccatttgggtatcaga

R E Q L M R V A H D S P Q G G H L G I R  
aaaacaactaaaagaattacaagaactttttattggcctggcatgttccagaaaataaaa  
K T T K R I T K N F Y W P G M F Q K I K  
gaatlttccggrtcatgtgcacctgccaagactgagtaccgggaggataagatcaaa  
E F C R S C D T C Q R L S T G R D K I K  
gctcctctaatecctatgctgttaattggagagccattttacagagtgggaatcgacata  
A P L I P M P V I G E P F Y R V G I D I  
attggtoctctttgtaaaccaagcaaaaggggttataagtacataactatgatcgac  
I G P L C K P S K R G Y K Y I L T M I D  
tatgtacaagataccagaagcagtagctctcaccaacatcgagacctcaaccatagct  
Y A T R Y P E A V A L T N I E T S T I A  
aatgctttgttatccatttggggaagaactggatatcccaaagaattagtatctgactta  
N A L L S I W G R T G Y P K E L V S D L  
gggaccagtttacctcgaaacttatgaagagactacttgagttatgcggcatcaggcat  
G T Q F T S K L M K R L L E L C G I R H  
cttacatcgacggcctaccaccacaacaaatgggttggtcgaaaatctaaataagact  
L T S T A Y H P Q T N G L L V E N L N K T  
ctaattaaaatgataaagtcttatagccaacagagaccgcatgattgggacattaagctt  
L I K M I K S Y S Q Q R P H D W D I K L  
caacaactattatttgcatacagatcagtcacccagcatagtagcaggtgcagccctttc  
Q Q L L F A Y R S V P Q D S T G C S P F  
gaactgttgttgaagaaggctcgaggaccgtagatttgggttaaggagtactgggag  
E L L Y G R K A R G P L D L V K E Y W E  
ggcagcccagcagcagcgggtccagtggtgattatctacgagatctacagtcaca  
A S P A A E P V P V A D Y L R D L Q S T  
atgcagtttagccaaggacatcacacatgagcatctaaccgcagcacaacaacggcagaaa  
M Q L A K D I T H E H L T A A Q Q R Q K  
gactattacgacgcaacatctaaggcgagaaacttcaacattggagatgaggtcctgttt  
D Y Y D A T S K A R N F N I G D E V L F  
ttgtcacctaacagaacaaacttcaaatggattggtcaggaccctggagagtcacc  
L S P N R T N K L Q M D W S G P W R V T  
aagaagcacaaccaagtgaactatgacatctataatgaacaattaaatgtcgaaggaga  
K K H N Q V N Y D I Y N E Q L N V E R R  
gtccatgtaaatatgtgaaacctatgtttggagatcggctaattgttatatagtagtg  
V H V N M L K P Y V W R S A N V Y I V V  
tcagaagatgaatccggtccctttactttttgggaaggatgatcgagagctatataaaaat  
S E D E S G P F T F W E G D R E L Y K N  
ttggatcaagtagagataagtaagagtttaaccaatctcaacgggaggagattgtggga  
L D Q V E I S K E L T Q S Q R E E I V G  
gttttaataaataatagtaaaatgtttctgatttaccaggaagggtccaaggggtacag  
V L N K Y S K M F S D L P G R V Q G V Q  
catcaaatataccaatgatgcagctcctatagcttcccctccgtaccgagtgactggg  
H Q I N T N D A A P I A S P Y R V T G  
aatatacaagagtgatcgagagggagggtgaaagagatgttgacctgggcattattgtg  
N I K E C I E R E V K E M L D L G I I V  
tcacgaatagtcctgggcttcacctattgtgctggttcagaagccagataaaaactatt  
S S N S P W A S P I V L V Q K P D K T I  
aggttttgtatagattatcgacttctgaacaagggtgacccaaactgatacatatcccctg  
R F C I D Y R L L N K V T Q T D T Y P M  
ccacgattggatgacctattggaaaggatcgggagagctcaatttatcagcagtatagac  
P R L D D L L E R I G R A Q F I S S I D  
cttactaagggattctggcaagtgccatggcaccacaagaccagcctaagacagcattt  
L T K G F W Q V P M A P Q D Q P K T A F  
cgtacgcaaggtgggctttacgaattctcagtggttaccttttggactaaaaaacagcccc  
R T Q G G L Y E F S V L P F G L K N S P  
acaacatttcaaagattgggtgacaaggctccttagtggcctaggaacttttgtgtggcc  
T T F Q R L V D K V L S G L G N F C V A  
tacatggatgatataggaatlttttagcaattcgtgggaggatcacctaagcatttggat  
Y M D D I G I F S N S W E D H L K H L D  
atagatttgggagattaaaggaagctggcttaaccatcaaagcttccaagtgtaaattg  
I V L G R L K E A G L T I K A S K C K L  
ggaaaaaccacaaaatattttagggcatttagtaggaggagggtgtattcgaccagac  
G K T T K Y L G H L V G G C I R P D  
tctactaaagtgaagctattcaccagtgggcagtgcccaaacgaaaaaacagggttaga  
S T K V K A I H Q W P V P K T K K Q V R  
tcattcctcggattggctggatattatcgaaaatttattcctcctttagtaattctggca  
S F L G L A G Y Y R K F I P S F S N L A  
gccccctttatcgagacctgacaaaaagaagaaccctaataaaaataatctggactccaaat

A P L S D L T K K K N P N K I I W T P N  
tgtcaaacatccatggatcggttgaacaggccattacatcagattctgtcttaaaagcc  
C Q T S M D R R L K Q A I T S D S V L K A  
ccgattttcgaatgaacdtttcatttgacttgcgacgctctgacattgggttaggagct  
P D F D E P F I L T C D A S D I G L G A  
gtcctaagtcaaattgataaggaaggtgaggacagacctatTTTTTTTTtaagtaagaag  
V L S Q I D K E G E D R P I L F L S K K  
tggcattcccacgaatgcagatgtccaccattgaaaaggagtggtactccataattgg  
W H S H E C S M S T I E K E C Y S I I W  
tcaataaggaactcaaacttatttatggggaaggaattcaccctacaaaccgaccat  
S I R K L K P Y L W G R K F T L Q T D H  
gcaccattgaaatgggtggataatgtaaaaggaacaataataaactgttacgggtggagt  
A P L K W L D N V K G T N N K L L R W S  
ttgtcattacaagattcacatacgaatcaaactgtcacaggtaaaagaaatgttgtt  
L S L Q D F T Y E I K H V T G K R N V V  
gctgatgcactgtctagagtgcttgaagaaagtttaaggtTTTTTTTatttatggtttattca  
A D A L S R V P \*

atgtatttaatacataaagtttgggttacagtaattgtgtttatatatatatatattgg  
atgcaatTTTTTaaattatttttgccattcggggattctaaatggccaaaaataatcttc  
tttgggtggaaggtgtggagaagtcataagattgtgtt**ta**atttttctgctgttgagtg  
tgtatttgggttttagttaacagtagccattttggaacatgagtaaaagcagcggacatt  
ttgtttcatttcacagtggttgggttgccatggagatgaagctggttagctcatgagaga  
gaagtggcgggcaaggaaggaagagcgggttttttaaaaagaagagaagccagttca  
gttgggagttgagatttgggagttgagaggggagagtggtgggagagaaggagaggggtg  
tgtgtgtgcatggctgttagctttagtcagaaagtagtgaagaaatagggctggcac  
agaaaccttttagtcaggacagactaaggggaatctagtaagatctctagtggggaaaaat  
ctagggatctgggatttgatcgggtatggatcaaattattagtccttatgtagtggggac  
attgtccacgaaggaactcgactgtggttagggctcgctacaatttggtaacatcagtaa  
gaaagtggagaagatttacaccaaagtctatgggtatagagttattaagccacttctct  
attagagttataaagtttaacaccaaaccgcaactaagcttggtacaaataaattt  
gttgttatttggtaacatctgtctcattccatttgcgctctgtggagccaagtttc  
attagtattaattcaaaagacctcacattgggtggcagtttaattgaatacatcacacacac  
agtatataattgggtggcagcgtatagagatttagtgtaacacttaagtttagttgacatc  
tttcaaatttgggtgacaggggtgggatctgaaaggattcccctctgtctgacaccttttc  
**a**attttgtaggctcataattgattccagtggtgaaagatacaaaagaaacttttatgag  
aaaactctgagatggatattccactttagaagtaacaaagggcacctattaggttgaca  
agatgacctacctataaagaatttagtagaggaacagaatgagataaaattaagaagt  
cacaagatgattaaaagagactacaagaagtgacatggcaacaatacttcaaataaaa  
gaatattttaactcagacaaaaattcggttttgggaaaaaaagggggacttttgggaca  
cgctactacaatcagaaaagaattaataactaatTTTacaacaatttgttggagtggg

>Chrysemys Gmrl gag/pol (AHGY01156441)

MYAKRLKSDLVELCKQRGLCIGRLTKEQLIAQLEAEDRANELIPVSQGS  
SLANAAQAPVSVPAAGSGHPAAEGFLRPLLPMPRGRVGRSPANTEGAVTPPASRGSPPRRSP  
PASRGSRRQRSASVERNWLEWEKELKRELEDREERQHEREEKERQHOREERQRQENER  
QRQHDLLELARKGSEPPAAVSEGGPRTARSFDKCI LAPRKEGEDMDDFLAFAFETACELHR  
VDPADRLRVLTPLLDPKAVALYRQLGEAEKGDYELFKKALLREFGLTPEMYRERFRSQDK  
**TPEISYQLQAVRMERYASKWAGGAQTKEDLIKLLVLEQLYERCPSDLRLWLVDKRPENPR**  
**HAGQLADEFLVKSRSGGREEPQRNRPAAMQRESHPGTSQTGNMGNPLPRGMPSIRDNRPA**  
RGDPRDLSCYYCGRRHVRAQC PKLKDRLSRPNPYRNLVEASHTRGAGSLSTAQERE GP  
PASFSGGPDAPDSKFSVYRVGAGLSLRSECLVPLEVDGKKVYGYWDTGAEVTLARPEVVA  
**PDRVVPNTFLTTLTGVGTPFKVPVARVHLKWKAKEGPKDVGVHHHLPTEVLMGGDLEDWP**  
SSPQTALVVTRSQSRRGALRPDLGKDVPEAPNPSRVGREHPRTGRGVAGASDPADEREQ  
VPIPSAAEFQAEQKDP SLRKLRLGLADLSVVQTMRRGCKERFLWEKGFYREWAPPGEV  
ESWGIRRLQLVVPQKFRHKL LLAHDIPLAGHQGIRRTQRLLQNFYWPGVFTNVRQYCRS  
CDPCQRVKGKARDKGAALRPLPI IEEPFQKVAMDIVGPLSKTTRSGKKYILVVVDFATRY  
**PEAVPLSSIEADTVADALLTIFSRVGFPEVLMQGSNFMALLRCLWERCVRHNWASA**  
**YHPQSNGLVERFNGTLKMLLKTFMNQHPQDWDKYLPHLLFAYREVPQESTGFSPFELLYG**  
RRVGPDLDMRDEWEKATPDGESVVEYVLTFRERLAELMGLARENLARAQRKQKVWYDR  
TARARAFATGDQVMVLI PVRKKNLQAWEQPFKVVKQLNEVNYVVELSNRAHHHRVYHVN  
MMKPYDRGNMVLAVCGQWEGQDDPLVDLFPGTRVGFPLEAIP LSDLRTPAQRAEIGGV  
LHL YQLFSNPGCTNLTVHRVQTGSHPP IKCSPFRATGKTAQDLEREVNDMLALGVIQ  
**SSSWASPVVLPKKGDSIRFCVDYRKLNAITVADAYPMRPDELLEDKLGGARYLTTMDL**  
**TKGYVQVPLDADARLKSASFVTPPLGLYEFLLTLPFGLKGPATFQHLVDQLLRGMESFAVAY**  
**IDDICVFSQTWEDHISQVRQVLDRLQKAGLTVKPEKCKVGMAEVSYLGHRVSGCLKPEP**  
AKVEVIRDWPAPQTKKQVQAF IGMAGYRRFVPHFSAIAAPITELCKKGPDKVWVTEEC  
QEALRALKEALVSGPVLNPDFDKPFMVFTDASDTGLGAVLMQDEKGERHPVYLSKKL

LPREQNYAAIEKECLAMVWALKKLEPYLFGRHFTVHTDHSPLTWLHQMKGANAKLLRWSL  
LLQDYDMDVVHVKGRDNLIAADALSRRGSPQLPQVTGQSDPAQFSLERGRDVTEQGAGQI\*

Size of LTRs: 422 bp, 99% ID

aacaaaatcctagcaatggtacaagtctgctcctaactcaggatggtaaaattgtcaatg  
atgccaaaaaggcagaagtattcaatgactcctttatgttctatatattcagactgtgacgga  
gcaggggagcagggcagatttgacctgggaatggtgcaggggggttcagtgaggatgtgg  
gacttcccttgaaggaagctacctgagctgtaacctgagccaggaacgggggtggggaga  
atatacccttctgcccgggagactgaacaaaggagaggagcagcgggaggagttttgag  
tttagttttcgggtggggctgggtggaacgcagggaaacccaagctgggggtctaagc  
tcctgaacctcccagaggacctaattgagggggctctggtcgtacctacacgctctgct  
tgagactgtgttctctgctccttaataaaccttctgctttactggctggtggagagtcgca  
gtgaatctcgggaaggggtgcagggccctaactccccacaatccgcaacaactgggtg  
gcagtggtgggatctactgcaccccgtagggcgcttctctgcagtaagtgactggggag  
cagtaaacgaaggggattgacggggaccaggcctgctgaagagtgggagagagcggg  
tattaccctgggagtggtgtagcagcagagaaggacttttgagtaacaggggtccccgg  
ggggatcgcagcagtggtcccagggcgaggagtctgcagctcgacctggcagagag  
gcggtgacctcagaaagggtggcacactaggggtccccctgggaactgtggggagctgt  
gagcacacaggccggtgagtgggccagcaggaagatgtatgccaagcggcttaagagcgac  
M Y A K R L K S D  
ctggtggagctgtgcaagcagagggggctgtgcatgagggctcacaaagaacagctc  
L V E L C K Q R G L C I G R L T K E Q L  
attgccagctggaggcggaagatcgcgcaatgaactgatccctgtgtctcagggaaagc  
I A Q L E A E D R A N E L I P V S Q G S  
agcctggcaaatgcagcgcaggcaccagtgctgtctccagctgggagtggtcatccggct  
S L A N A A Q A P V S V P A G S G H P A  
gctgagggcttctgagaccctcttctctatgcctaggggaaggggtggggaggagccca  
A E G F L R P L L P M P R G R V G R S P  
gcgaataaccgaagcgccgtgaccccccgccagcaggggatcccccgccgaagcccg  
A N T E G A V T P P A S R G S P R R S P  
ccggccagcagaggatcctcccggcaacggttcggcatccgtggagcggattggctggaa  
P A S R G S S R Q R S A S V E R N W L E  
tgggagaaagagctaaaactgagagagctggaggatcgtgaacgacagagacagcatgaa  
W E K E L K L R E L E D R E R Q R Q H E  
cgggaggaagagagacagcatcagcgtgaagagagacagagacagggagaatgagaga  
R E E K E R Q H Q R E E R Q R Q E N E R  
cagcgtcagcatgacctggaactggcgagattgaagggcagcgaacccccggctgagggtg  
Q R Q H D L E L A R L K G S E P P A A V  
agtgaggggggacccaggactgcacggagctttgataagtgcatcctggccccacgcaag  
S E G G P R T A R S F D K C I L A P R K  
gagggggaggacatggatgacttctggaggcctttgagacggcctgagagctgcaccgg  
E G E D M D D F L E A F E T A C E L H R  
gttgatcccggcagacagactccgggtccttacccttactggacccccaaagcgtggca  
V D P A D R L R V L T P L L D P K A V A  
ttgtaccgccaactgggagagggcagagaaaggggactacgaactattcaaaaaggccctg  
L Y R Q L G E A E K G D Y E L F K K A L  
ctacgtgagtttgggtgactcctgagatgtaccgggaaaggttccggagtcagataaaa  
L R E F G L T P E M Y R E R F R S Q D K  
accctgagatctcatatctgcaactagccgtccgcatggaaagatacggccagcaagtgg  
T P E I S Y L Q L A V R M E R Y A S K W  
gctggtggggcccagacgaaggaggacctgattaaactgctggtactggagcaactgtat  
A G G A Q T K E D L I K L L V L E Q L Y  
gagcgggtgccatccgacctgaggctgtgggtgggtggacagaaagccagagaacccgcga  
E R C P S D L R L W L V D R K P E N P R  
cacgctgggpcagctggctgatgagttgtaaagagccgggtcaggggggtggcagggaggag  
H A G Q L A D E F V K S R S G G G R E E  
ccccaaaggaacaggcccggcgatgcagagagagagtcaccctgggacctcccaaagc  
P Q R N R P A A M Q R E S H P G T S Q T  
gggaatatggggaatcccctcccacggggaatgccagcatcagggacaaccgaccggct  
G N M G N P L P R G M P S I R D N R P A  
cgaggggaccacgggactgagctgctattactgcgggccgaagggccacggttcggggcc  
R G D P R D L S C Y Y C G R R G H V R A  
cagtgcccaagctcaaggacagactgagcagaccgaaccataccgggttaacttggtgta  
Q C P K L K D R L S R P N P Y R V N L V  
gaggttcccacacaagaggggctggcagcttatcaactgctcaagagagagaagggccc  
E A S H T R G A G S L S T A Q E R E G P

ccggccagcttctctgtggggggccagatgctccggattcaaagttctccgtttacagggtt  
P A S F S G G P D A P D S K F S V Y R V  
ggcgcggggtgtccctgcgggagtgagtccttgttcccctggaggtggatgggaagaaa  
G A G L S L R S E C L V P L E V D G K K  
gtttatggatactgggacacgggagcagaggtgacactggccccggccgaggtggtggcc  
V Y G Y W D T G A E V T L A R P E V V A  
ccagatcgggtggtgcccacaccttctgaccctgaccggggtggcgggacccattc  
P D R V V P N T F L T L T G V G G T P F  
aaggttcccgtagcaggggtacacctgaaatggggggccaaggagggccccaaggacgtg  
K V P V A R V H L K W G A K E G P K D V  
ggagtgcaccaccatttgcctactgaggtggtgatgggggggacctagaggactggcca  
G V H H H L P T E V L M G G D L E D W P  
agcagccccagaccgcttagtctgtagcccgtagccagagccggcgaggggactacgc  
S S P Q T A L V V T R S Q S R R G A L R  
cctgaccttgggaaggatgtcccaccggaggcaccgaacccttcccgggtggggaggaa  
P D L G K D V P P E A P N P S R V G R E  
cacccaaggcagggcggggtggctggggcttccgaccagccgacgagagggagcag  
H P R T G R G L V A G A S D P A D E R E Q  
gtccccatcccttcccagccgaggttccaggccgagttgcagaaggaccctccctg  
V P I P S P A A E F Q A E L Q K D P S L  
cggaagctaaggggctggctgacctcagtggttacagacctagggagaggatgcaag  
R K L R G L A D L S V V Q T M R R G C K  
gagaggttctgtgggagaaggggttctgtaccgagagtggtggctccccgggggaagtg  
E R F L W E K G F L Y R E W A P P G E V  
gagtcgtgggggatcaggaggcagctggtggttcccagaagtttccgccaagctactg  
E S W G I R R Q L V V P Q K F R H K L L  
tacctggcccatgacatccctctcgcagggcaccaggggatccggcgcaccaggcagagg  
Y L A H D I P L A G H Q G I R R T R Q R  
ctgctacagaacttttactggccccgggtcttccaccaacgtccggcagtagtactgccgatcc  
L L Q N F Y W P G V F T N V R Q Y C R S  
tgtgaccctgcccagaggggtggggaaggccccgggacaaggggaaggcagcattgagacct  
C D P C Q R V G K A R D K G K A A L R P  
ttgcccatcatagaagagccttccagaaggtggccatggacatagtgggacctctcagc  
L P I I E E P F Q K V A M D I V G P L S  
aagacgaccggctctgggaagaatacatcctggtggtggttagatttccgcccaccgctac  
K T T R S G K K Y I L V V V D F A T R Y  
cccagggcagtgcccttatcgtkccatggaagcagacactgtggcggtgctgctgacc  
P E A V P L S S I E A D T V A D A L L T  
atthtcagccgagtggggttcccgaaggaagtcttgatggaccaaggggtccaacttcatg  
I F S R V G F P K E V L M D Q G S N F M  
tcggccctactccgggtgcttgtgggagagatgtggggtccggcacaactgggcctcagca  
S A L L R C L W E R C G V R H N W A S A  
tatcccccaatccaagggctggtggagaggttcaatgggacgctaaaaatgatgctg  
Y H P Q S N G L V E R F N G T L K M M L  
aaaacatthtatgaatcagcaccggcaggactgggacaagtacttacctcacctgctgttt  
K T F M N Q H P Q D W D K Y L P H L L F  
gcgtacagggaggtaccccaggagtctaccgggttttgcctttcgaactgctatatgga  
A Y R E V P Q E S T G F S P F E L L Y G  
aggcggttaagggggccccctggacctgatgagagacgaatgggaggggaaggccactcct  
R R V R G P L D L M R D E W E G K A T P  
gacggagagtcgggtggagtagtctcctgaccttccgggaacgacttgccgagctcatg  
D G E S V V E Y V L T F R E R L A E L M  
ggcctggccagggagaatctggccagagcccagaggaagcagaaggtctggtatgaccgc  
G L A R E N L A R A Q R K Q K V W Y D R  
acagcacgggccccgccttccgactggggatcaggtgatggtcctcatccccgtgagg  
T A R A R A F A T G D Q V M V L I P V R  
aaaaacaaactccagggcgcctggaagggcccttcaaggttgtaagcaactaaacgag  
K N K L Q A A W E G P F K V V K Q L N E  
gtaaactatgtggtggagctgtcgaaccgggacaccaccaccgggtgtaccatgtgaat  
V N Y V V E L S N R A H H H R V Y H V N  
atgatgaagccatattatgacagggggaatatggtgttggcgtgtgtggacagtgagg  
M M K P Y Y D R G N M V L A V C G Q W E  
ggcgagggagatgacctttagtagatctattccctgggacaagagtggttcccctg  
G Q G A D D P L V D L F P G T R V G F P L  
gaagcaattcccctctctgatcgggtaaccctgcccagcgagctgagatcggaggggtg  
E A I P L S D R L T P A Q R A E I G G V  
ctgcatctgtaccagcagctgttttcaaccagcctggatgcactaatctgactgtccac  
L H L Y Q Q L F S N Q P G C T N L T V H

cggtgacagacaggatcgaccccgctataaaaatgctcccccttccgagccacagggaaa  
R V Q T G S H P P I K C S P F R A T G K  
actgctcaggacctggaagagaggtcaatgacatgctggctttgggggtgatccagccg  
T A Q D L E R E V N D M L A L G V I Q P  
tcttccagcccttggcctcgccgggtggtgctgggtccccaaaaaggacgggtcgatccgg  
S S S P W A S P V V L V P K K D G S I R  
ttctgtgtggactatcggaagctcaatgccatcactgtagccgatgcctacccatgcc  
F C V D Y R K L N A I T V A D A Y P M P  
aggccggacgagctcctagacaagctgggaggtgctcggtaccttaccacatggatctt  
R P D E L L D K L G G A R Y L T T M D L  
acaaagggctattggcaagtggcgtggatgcagatgccaggctgaaatcggccttctg  
T K G Y W Q V P L D A D A R L K S A F V  
accctctgggc

T P L G  
ctctatgagttcctgaccctgccttccggcctcaagggagcgcggccacc  
L Y E F L T L P F G L K G A P A T  
ttccagcctgggtgactcagctactgaggggatggagagttttgcccgtggcgatatc  
F Q H L V D Q L L R G M E S F A V A Y I  
gatgacatctgtgtctttagccagacctgggaggaccacatatcccaggttagacaagt  
D D I C V F S Q T W E D H I S Q V R Q V  
ctggaccgactccagaaggtgggtgaccgtaaaaccggagaagtcaaggtggggatg  
L D R L Q K A G L T V K P E K C K V G M  
gctgaggtatcctactaggccaccgggtgggaagcggctgcctaaagccggaaccagcc  
A E V S Y L G H R V G S G C L K P E P A  
aaagtggaggtgatcagagactggcccgctcctcaaaccaaaaagcaggtccaagccttt  
K V E V I R D W P A P Q T K K Q V Q A F  
attgggatggcaggtactatcggaggttcgtgcccacttttagcgcctagccgcccc  
I G M A G Y Y R R F V P H F S A I A A P  
atcactgagctgtgcaagaaggggaagccagacaaagtggctgaccgaggagtccag  
I T E L L C K K P D K V V W T E E C Q  
gaggtctccggcgtgaaggagctcgtggtcagtgcccagttctggcaaacccagac  
E A L R A L K E A L V S G P V L A N P D  
tttgacaagccctttatgggtgttaccgacgcctcagacacaggactggggcggtgtta  
F D K P F M V F T D A S D T G L G A V L  
atgcaggaggatgaaaagggggagagacaccccatcgtgtacctgagcaagaagttgcta  
M Q E D E K G E R H P I V Y L S K K L L  
ccccgggagcagaactcagcggccatcgagaaggaatgcctggccatggtgtggccctc  
P R E Q N Y A A I E K E C L A M V W A L  
aagaaactagagccatatctctttggcgctcacttcaccgtgcacaccgaccactctccc  
K K L E P Y L F G R H F T V H T D H S P  
ctgacctggctgcaccagatgaaaggagccaacgccaagctcctgaggtggagcctgctc  
L T W L H Q M K G A N A K L L R W S L L  
ctgcaggattatgacatggacgtggtccatgtgaaggagcgtgacaacctgatagcggat  
L Q D Y D M D V V H V K G R D N L I A D  
gcattgtcccggagagggagccctgaacttccccaggtcactggtcagagtgaccccgct  
A L S R R G S P E L P Q V T G Q S D P A  
cagttcagctcgaacgggggagagatgtgacggagcagggagcagggcagatttgacct  
Q F S L E R G R D V T E Q G A G Q I \*

gggaatgttgcaggggggttgcagtggggatgtgggacttcccttgaaggaagctacctg  
agctgtaacctgagccaggaacgggggtggggagaattaacacctctgcccgggagact  
gaacaaaggagaggagcagcgggaggttttgagtttagttttcgggtggggctgggtg  
gtgcaacgcaggggaacccaagctgggttcaagctccctgaacctcccagagggacct  
atgaggggggtctggtcgtacctacacgctctgcttgagactgtgttctctgctcttaaat  
aaaccttctgcttactggctggttgagagtcgcagtgaaatcttgggaaggggtgacg  
ggcctgactccccacaatccgcaacacagacagaagcaggacgatgtattcacacctg  
aaactgaaatactttctatagcatcagtagctagggaggtgtaacaacagctattaag  
ctaaatcaccagactgggtaacttgcaccaagacagtaagagaattgtctgaggagct  
ttctgaaccacaaatgttaattccccaaatctcaggacacaggcgaatctccaggagact  
ggaacaaagccaggatagcggcactgtttacaaagggatgaatggaatgacctcagatcta

>Sphenodon Gmr1 (AC154989)

orf1

DQALACGETSKGALRAVSGSRGVFLEKKGESPPRRPRVWPKVGHKHRGFTTTGAVAQ  
IRKAGKCRAGGEDTPSSPGMDAEAIKWLMEHQALQLETRVFFQQLTTELATQARTQA  
HLAEQVTALMTPALAAVTTSSHGGGEARGPQVRLTKMAPSDDPKAFLDI FERVTTASKWP  
ED\*WAVFLAPCLSGPA\*AVYDWMEPRDVANFRKVKETILRGLDISEETRKRFRGERYPP  
GTFPQAVAQQLRTHCLWLLKPKQQRSAQEIVLELLMTEQFIRILPPGGRRAWVARHQPASLEE

AVHLMENYEAFEGTASYELREGPRNY SREEKGPRGGEPRETRPVGPGRGHSREEGI PSGN  
 VRKEGDPRGPPGGSRRLLMNPVYPGPGGAREGTGAPATRVCYQCGRPGHFKRDCPLMD  
 CTFADGWLGEESGGRINL\*

Orf 2

ELIEDRLYRVTKEPERGEVYQLLAPKEVQOELLRMAHEIPCVGHLGRERLVTRFYWPGI  
 RAAVQHYCASCPECQLTTRKRVAPAPLVPLPLVGVPPFERMGIDIIGPIEQSSEGYRYILV  
 TVDYATRYPDAVALKSIKAPIIARELLKIFSRMGFPHTLLTDQGSNFMGRLLMRQLCQLLR  
 IRQIRTSVYHPKTDGMVERFNQTLKAMLWKVFVREEPKA\*PSLLPALLFAY\*EVPQASLGF  
 SPFELLYGHRPRGILDVREGWEASAFSQHNVLVYVMLRERLRQMWWEAERNGLEAQT  
 QTAWFDKKA\*PCQLQPGQRVLVLLPSTESKLLATWQGPYEVVKVQVGMMDYTVWQPGRRPE  
 IQTYHVNLLKEWKEREADLAEALGGEDQALRSPNGETCP IQLGKDLKDSQRSQVSKLVSS  
 FPHVFTSQPGCTPLTQHNIVKEPRKVAREAPWRHPRHLLQVMQDEV RAMLELGVIVESNS  
 PWRSQPVLVGVKPDGSTRFCIDFRKVNALSRFDAYPMPRINLLEHLGEAKYLP TMDLTKG  
 YWQIPLTPAAQEKTAFAATPMALYQFVRMPFGLHGAPATFAPLMDKLLNHGAYAAA**YIDD**  
 I I IFSNTWSEHLEHLTR IARALEETGLTANPKKCHLGVCP LGHLPGLPGGERADPPAVGQ  
 QGGKGLDPPPATKKVQVQFFLAGYRQHVPHFATIAAPFSDTTKKQPARVAWTPAVA  
 EAFDTLKRALCQAPVLYTPDFTQPFILQTDASDVGLGVVLSQQVGSSEHP IVYLSRKLEP  
 REQAYATIEKEALAIWVVI VALRYLAGATFTLVTDHAPLKWLTSMKESALLMHWYLAL  
 QPYHFKIGHRAGKLHNNADFFSRQGDSAPQPIRPRRTLLNGGVCDEVRSGGPWSPGRSPD  
 DEEQEELGIALAGSEGGVARPSAVMTAGSVPPQGRARPGQGRGECLKRRRAVSGEREE  
 GWMLDPTEWHRDLWDWRGLRG\*

>Chrysemys Gmr1 (AC239223)

MYAKRLKSDLVELCKQRGLCIGRLTKEQLIAQLEADRANELIPVSQGS LANAAQAPVS  
 VPAGSGHPAAEGFLRPLLPMPGRVGRSPANTEGAVTPPASRGSRRSPASRGSRRQRS  
 ASVERNWLEWEKELKRLRELEDRERQRQHEREEKERQHOREERQRQENERQRQHDLELARL  
 KGEPPAAVSEGGPRTARSFDCI LAPRKEGEDMDDFLEAFETACELHRVDPADRLRVL  
 PLTDPKAVALYRQLGAEAKGDYELFKALLREFGLT**PEMYRERFRS****QDKTPEISYLQLAV**  
**RMERYASKWAGGAQTKEDLIKLLVLEQLYERCP****SDLRLLWLVDKPE****ENPRHAGQLA**DEFVK  
 SRSGGREGREPQRNRPAAMQRESHPGTSTQGNMGNPLPRGMPSIRDNRPARGDPRDLSCYY  
 CGRRGHVRAQCPKLDRLSRPNPYRVNLVEASHTRGAGSLSTAQEREGPPASFGGPDAP  
 DSKFVSVYRVGAGLSLRSECLV**LEV****DGKKVYGYWDTGAEVTLARPEV****VAPDRVVPNTFLT**  
**LTGVGGT****PFKVPVARVHLKWKGAKEG**PKDVGVHHHLPTEVLMGGDLEDWPSQPOTALVVTR  
 QSRRGALRPDLGKDVPEAPNPSRVGREHPRTGRGVAGASDPADEREQVPIPSAAEFQ  
 AELQKDP SLRKLGLADLSVVTMRGCKERFLWEKGFLYREWAPPGEVESWGI RRRQLVV  
 POKFRHKL LYL AHDIPLAGHQGIRRTQRLLQNFYWPGVFTNVRQYCRSCDPCQRVKGAR  
 DKGAALRPLPIIEEPFQKVAMDIVGPLSKTTRSGKYLILVVVDFATRYPEAVPLSSIEA  
 DTVADALLTIFSRVGFPEKVLMDQGSNFM SALLRCLWERC GVRHNWASAYHPQSNGLVER  
 FNGTLKMMMLKTFMNQHPQDWDKYLPHLLFAYREVPQESTGFSPFELLYGRRVRGPLDLMR  
 DEWEGKATPDGESVVEYVLTFRERLAE LMG LAREN LARAQRKQKVWYDR TARARAFATGD  
 QVMVLI PVRKNKLAQAAWEG**GF**KVVKQ LNEVNYVVELSNRAHHRVYHVNMMPY YDRGNM  
 VLVACGQWEGQDDLVDFPGTRVGFPLEAIPLSDR LTPAQRAEIGGVHLHYQQLFSNQ  
 PGCTNLTVHRVQTGSHPPIKCSPPFRATGKTAQDLEREVNDMLALGVIQPS SSPWASPVL  
 VPKKDGSIRFCVDYRKLNAITVADAYPMPRPDEL LDKLGGARYLTTMDLTKGYWQVPLDA  
 DARLKS AFVTPGLYEF LTLFPLGK G PATFQHLVDQLLRGMESFAVAY**IDD**ICVFSQTWE  
 DHSQVRQVLDRLQKAGLTVKPEKCKVGM AEVSYLGHVRVSGCLKPEPAKVEVIRDPWAP  
 QTKKQVQAFIGMAGYRRFVPHFSAIAAPITELCKKGPDKVWVTECQEALRALKEALV  
 SGPVLANPDFDKPFMVF TADSDTGLGAVLMQEDEKGERHP IVYLSKLLPREQNYAAIEK  
 ECLAMVWALKKLEPYLFRHFTVHTDHSPLTWLHQMKGANAKLLRWSLLQLQDYDMDVVHV  
 KGRDNL**ADALSRR**GSPELPQVTGQSDPAQFSLERGRDVTEQGAGQI\*

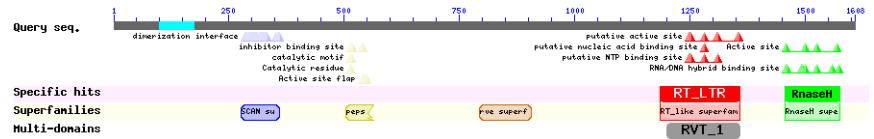

>Alligator Gmr1 (AKHW01010148)

MMWRST\*RHLNGQR  
 WPQSGTPGVGLL\*DPPLIXPTQAIYRALSRAEARDYKVKVKAAILY\*LEISPETYQHKFW  
 AKKGSEYQGPQLLAQTLQDLAEWWLCP EHTTQEVIDMIVLKQFLD L TGSTQRWVR\*HQ  
 PKMVEVLHLHPEDYTTAEGEGETPKKERSGGPTFTHRENTLAPHRRVETAQKEGHAGSYQ  
 DVVCYQCCEKXHSRFCPRXWDSGPLAEKHDEKMDCSFRRHQGLGQKNKPIVEVRIGNT  
 IIPAI**IDTGC**SHLMVHSDLVPPHLGNFGT PVSVMCMHGAVYTYPRRKLKLSVLGWTEEIL  
 VGLTKPLPCLILLGLDWP HLG EVICRMTDGHRAEEVTRHTLTCFGDEE EGLNIDQIAEGG  
 NFCQQQRQEP LFNHNIWKTI ERPEETTGTAPKPPWTLRCEVRTGLLYWVEDLEEGGERAQ

ILVPQRYWEGLLQVAHTLPMGGHLGHDKTEARLKHVPVFWPGIYKMTKKFCAECPECQKTG  
 RVRPARVPLIPMLLITRPFDRIALDITGPFPHSKTYGYQFVLVKINYVTRFPKAVPLRSMT  
 ALAIVTALLQWIA\*VGI~~LR~~EILTDQGNFMSKIFKGV~~CQ~~V~~LK~~I~~V~~Y~~HP~~Q~~T~~D~~G~~L~~V~~E~~R~~F~~N~~R~~T~~L  
 K~~G~~M~~N~~L~~R~~A~~C~~I~~Q~~G~~D~~P~~R~~E~~W~~E~~S~~L~~L~~P~~L~~L~~F~~A~~I~~R~~E~~A~~P~~\*A~~S~~M~~G~~Y~~A~~L~~F~~E~~L~~V~~C~~G~~H~~S~~P~~W~~L~~L~~D~~L~~I~~E~~E~~W~~T~~Q  
 T~~Q~~M~~D~~S~~F~~Q~~P~~R~~L~~V~~G~~E~~F~~C~~K~~\*L~~Q~~K~~A~~Q~~E~~I~~A~~Q~~R~~H~~L~~N~~Q~~S~~Q~~E~~R~~Q~~R~~Q~~Y~~D~~V~~W~~A~~V\*~~R~~E~~L~~Q~~V~~G~~D~~W~~V~~V~~L~~L~~P~~  
 D~~S~~T~~H~~K~~L~~T~~A~~Q~~W~~\*G~~P~~F~~Q~~V~~I~~Q~~R~~T~~G~~P~~V~~N~~Y~~E~~V~~L~~R~~T~~E~~P~~T~~R~~R~~R~~Q~~I~~Y~~H~~I~~N~~L~~L~~R~~K~~W~~R~~Q~~G~~E~~G~~W~~L~~V~~Q~~Q~~K~~E~~E  
 A~~E~~E~~G~~D~~M~~T~~T~~V~~R~~D~~L~~T~~G~~A~~P~~E~~T~~P~~R~~V~~D~~D~~Q~~L~~D~~Q~~N~~R~~Q~~T~~E~~V~~K~~A~~L~~I~~A~~E~~F~~Q~~D~~V~~F~~N~~E~~M~~P~~G~~E~~A~~K~~G~~V~~C~~H~~R~~I~~T~~T~~  
 P~~A~~G~~R~~I~~I~~R~~D~~H~~W~~R~~R~~L~~P~~C~~H~~S~~W~~P~~V~~V~~W~~Q~~E~~I~~D~~Q~~M~~K~~E~~Q~~G~~I~~I~~E~~E~~S\*~~S~~P~~W~~R~~S~~P~~I~~V~~V~~V~~P~~K~~P~~D~~G~~S~~I~~W~~V~~X~~V~~D  
 Y~~R~~K~~L~~N~~E~~I~~A~~R~~F~~D~~A~~F~~P~~M~~P~~Q~~I~~D~~D~~M~~L~~K~~K~~I~~G~~Q~~T~~R~~F~~I~~S~~T~~L~~D~~L~~I~~K~~G~~Y~~W~~K~~I~~P~~M~~A~~E~~E~~D~~K~~E~~K~~M~~A~~F~~R~~T~~P~~W~~G~~  
 L~~F~~Q~~F~~K~~R~~M~~P~~F~~L~~H~~G~~A~~A~~A~~S~~F~~Q~~W~~L~~M~~E~~H~~L~~L~~G~~P~~H~~Q~~E~~Y~~A~~A~~A~~**YINDI**I~~I~~F~~S~~P~~S~~W~~E~~T~~H~~C~~E~~H~~L~~W~~K~~V~~L~~G~~S~~  
 F~~W~~R~~A~~G~~L~~M~~A~~N~~P~~R~~K~~C~~A~~L~~G~~K\*~~E~~T~~Q~~Y~~L~~G~~F~~T~~V~~G~~Q~~T~~I~~K~~P~~I~~T~~D~~K~~V~~A~~A~~I~~K~~Q~~S~~L~~P~~Q~~T~~L~~K~~Q~~L~~S~~F~~L~~G~~F~~  
 A~~N~~Y~~Y~~R~~R~~F~~I~~L~~N~~S~~A~~K~~A~~T~~L~~L~~T~~E~~E~~L~~T~~R~~G~~C~~C~~N~~P~~I~~S~~W~~N~~P~~E~~V~~L~~Q~~A~~F~~D~~\*~~L~~K~~E~~T~~L~~S~~Q~~H~~P~~V~~L~~Y~~M~~P~~D~~F~~R~~T  
 T~~F~~F~~L~~Q~~T~~D~~A~~S~~A~~V~~A~~L~~R~~V~~I~~L~~F~~X~~K~~D~~Q~~G~~A~~E~~R~~P~~A~~A~~F~~A~~S~~R~~K~~L~~K~~P~~A~~E~~T~~P~~Y~~S~~T~~I~~E~~R~~E~~C~~L~~A~~V~~R~~W~~G~~I~~E~~L~~F~~Q~~  
 Y~~L~~L~~G~~R~~R~~F~~M~~L~~I~~T~~D~~H~~A~~P~~L~~S~~W~~L~~R~~T~~A~~K~~L~~N~~N~~A~~R~~L~~M~~R~~W~~S~~L~~S~~L~~Q~~P~~F~~C~~F~~T~~V~~E~~H~~R~~A~~G~~W~~T~~S~~G~~**NVDFLSH**  
 P~~E~~G~~G~~P~~S~~K~~V~~P~~A~~P~~T~~N~~Q~~D~~T~~R~~R~~S~~S~~I~~K~~L~~G~~P~~H~~N~~G~~G~~K~~N~~H~~\*

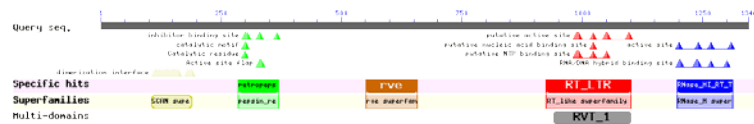

>Alligator Gmrl (AKHW01070087), 1438 aa

MMTLEAALTETPTTEVPSEVVAGEVREPPDPTT  
 QGTFRGLAGSGQARTATRAKAAQECLVEQRRARQAGALAGNMEDPDLAPYANMQPAAMGP  
 ADVLGQNLQVLTQIILDSQQQTMDRQQDWLRHSLASF~~K~~M~~P~~K~~M~~T~~K~~D~~N~~D~~P~~E~~A~~Y~~I~~E~~V~~F~~E~~W~~H~~A~~L~~M  
 TGLDQGYWASQLGALVVGKAQAAYRALSR~~E~~D~~A~~R~~D~~Y~~E~~L~~V~~K~~Q~~T~~I~~L~~Y~~R~~L~~E~~I~~N~~P~~E~~H~~X~~R~~R~~L~~F~~R~~A~~K~~  
 K~~G~~P~~D~~K~~R~~R~~P~~R~~V~~L~~L~~Q~~L~~L~~R~~D~~L~~L~~D~~K~~W~~N~~P~~A~~G~~Q~~D~~R~~E~~A~~L~~A~~D~~Q~~I~~V~~L~~E~~Q~~F~~Q~~N~~D~~L~~E~~E~~R~~T~~Q~~R~~W~~V~~R~~Q~~H~~T~~P~~R  
 T~~C~~E~~E~~A~~L~~K~~L~~A~~E~~A~~F~~T~~A~~S~~E~~A~~S~~Y~~P~~R~~E~~R~~K~~S~~P~~G~~Y~~S~~P~~V~~N~~P~~K~~E~~P~~E~~R~~R~~R~~L~~P~~G~~R~~G~~A~~T~~R~~E~~T~~V~~C~~F~~Q~~C~~R~~Q~~N~~G~~H~~  
 F~~S~~R~~E~~C~~P~~N~~Q~~V~~V~~E~~H~~W~~L~~L~~T~~D~~R~~S~~R~~A~~Q~~A~~E~~R~~R~~R~~G~~P~~E~~S~~G~~K~~P~~M~~D~~C~~S~~Y~~A~~V~~G~~K~~E~~N~~V~~A~~S~~R~~P~~V~~V~~K~~A~~W~~V~~E~~G~~R  
 L~~V~~Q~~A~~T~~L~~D~~S~~A~~C~~A~~Q~~L~~L~~V~~R~~S~~D~~L~~V~~G~~A~~Q~~Q~~R~~G~~A~~C~~P~~V~~R~~V~~A~~C~~L~~H~~G~~E~~T~~K~~L~~V~~E~~C~~L~~R~~V~~R~~L~~R~~V~~M~~E~~H~~Q~~G~~E~~L~~L  
 V~~G~~V~~M~~L~~Q~~L~~S~~C~~E~~L~~L~~L~~G~~R~~D~~W~~P~~V~~V~~Y~~D~~V~~L~~D~~R~~V~~R~~D~~T~~E~~V~~A~~R~~R~~I~~Q~~D~~C~~E~~G~~W~~L~~G~~K~~T~~Q~~E~~N~~E~~E~~S~~T~~D~~E~~T~~N~~E~~L  
 D~~L~~N~~F~~T~~S~~C~~L~~Q~~F~~R~~E~~A~~Q~~E~~D~~H~~E~~I~~R~~E~~L~~Q~~E~~H~~A~~\*~~G~~P~~Q~~D~~I~~P~~V~~L~~P~~E~~G~~P~~P~~C~~F~~E~~V~~R~~N~~R~~L~~L~~Y~~R~~V~~Q~~G~~D~~R~~R  
 G~~E~~T~~L~~G~~S~~Q~~L~~V~~V~~P~~A~~R~~F~~H~~Q~~I~~T~~W~~R~~L~~A~~H~~A~~S~~P~~T~~G~~G~~H~~L~~A~~R~~D~~K~~T~~L~~A~~R~~I~~S~~Q~~W~~F~~F~~W~~P~~G~~M~~G~~E~~E~~V~~A~~R~~Q~~C~~A~~A~~C~~  
 P~~E~~C~~Q~~K~~T~~R~~A~~E~~R~~P~~A~~Q~~A~~P~~L~~Q~~P~~M~~P~~I~~I~~D~~T~~P~~F~~S~~R~~I~~A~~L~~D~~V~~I~~G~~L~~P~~R~~S~~S~~S~~G~~N~~Q~~Y~~I~~L~~V~~I~~V~~D~~Y~~A~~T~~R~~Y~~T~~E~~T  
 I~~P~~L~~R~~A~~V~~T~~A~~P~~R~~I~~A~~E~~E~~L~~I~~K~~W~~I~~A~~R~~M~~G~~I~~L~~Q~~E~~I~~L~~M~~D~~Q~~G~~R~~N~~F~~M~~F~~G~~V~~L~~R~~V~~V~~C~~R~~T~~L~~Q~~I~~K~~Q~~L~~C~~T~~S~~V~~Y~~H~~P~~  
 Q~~T~~N~~G~~L~~V~~E~~C~~L~~N~~G~~T~~I~~K~~Q~~V~~L\*~~C~~C~~I~~Q~~G~~D~~P~~R~~K~~W~~D~~L~~L~~L~~P~~V~~L~~F~~T~~L~~R~~D~~A~~P~~Q~~D~~M~~M~~K~~F~~S~~P~~F~~E~~L~~V~~L~~G~~H~~Q~~P~~  
 R~~G~~L~~L~~Q~~V~~L~~R~~E~~G~~W~~E~~Q~~E~~T~~G~~P~~S~~Q~~E~~P~~K~~T~~Y~~Q~~R~~E~~L~~Q~~Q~~R~~I~~K~~V~~A~~Q~~D~~L~~A~~H~~E~~N~~T~~R~~E~~A~~Q~~A~~C~~Q~~K~~E~~K~~Y~~D~~R~~H~~A~~X~~E~~  
 R~~E~~F~~E~~P~~E~~G~~Q~~R~~V~~L~~V~~L~~P~~T~~S~~T~~S~~K~~L~~L~~T~~Q~~W~~Q~~G~~P~~F~~E~~I~~L~~R~~\*~~V~~G~~P~~V~~D~~Y~~E~~V~~H~~K~~P~~S~~H~~L~~R~~E~~K~~Q~~I~~Y~~H~~I~~N~~L~~L~~R~~E~~  
 W~~R~~E~~P~~E~~G~~W~~V~~A~~F~~S~~E~~T~~N~~D~~E~~L~~G~~P~~Q~~L~~G~~R~~E~~A~~V~~P~~T~~K~~E~~E~~T~~L~~V~~R~~N~~G~~E~~L~~V~~P~~E~~Q~~R~~Q~~E~~A~~Q~~N~~L~~I~~E~~E~~F~~R~~E~~V  
 F~~R~~E~~E~~P~~G~~W~~I~~Q~~D~~S~~F~~H~~A~~I~~N~~P~~P~~G~~A~~I~~V~~R~~E~~R~~W~~R~~P~~I~~P~~H~~L~~L~~E~~A~~I~~R~~R~~E~~V~~D~~S~~M~~L~~K~~L~~G~~V~~I~~Q~~L~~S~~R~~S~~P~~W~~R~~S~~P  
 L~~V~~P~~V~~H~~K~~P~~D~~G~~S~~L~~R~~L~~C~~V~~D~~Y~~R~~Q~~L~~N~~A~~L~~A~~M~~F~~D~~A~~F~~P~~M~~P~~H~~V~~A~~E~~L~~V~~E~~R~~I~~G~~D~~A~~Q~~Y~~I~~S~~T~~L~~D~~L~~A~~K~~G~~Y~~L~~K~~I~~P~~  
 V~~A~~K~~E~~D~~Q~~P~~K~~T~~V~~F~~G~~T~~P~~W~~G~~L~~Y~~E~~F~~V~~R~~M~~P~~F~~L~~H~~G~~A~~A~~A~~M~~F~~Q~~R~~L~~M~~D~~Q~~I~~L~~A~~P~~R~~A~~E~~Y~~A~~T~~A~~**YIDN**I~~V~~I~~Y~~T  
 Q~~T~~W~~A~~Q~~H~~K~~R~~A~~L~~R~~A~~I~~L~~M~~E~~L~~R~~R~~A~~G~~L~~M~~A~~N~~P~~R~~K~~C~~A~~L~~A~~Q~~E~~T~~K~~Y~~L~~G~~F~~L~~F~~G~~R~~G~~M~~I~~K~~P~~F~~A~~D~~K~~V~~E~~I~~I~~R~~N  
 F~~M~~A~~P~~Q~~N~~C~~R~~Q~~L~~R~~S~~F~~L~~G~~I~~T~~N~~Y~~R~~R~~F~~V~~P~~H~~F~~S~~V~~L~~S~~A~~P~~L~~S~~E~~A~~L~~K~~G~~R~~K~~T~~G~~A~~V~~R~~W~~T~~E~~E~~M~~T~~R~~S~~F~~K~~M~~L~~K  
 Q~~A~~L~~C~~E~~E~~V~~V~~I~~H~~T~~P~~D~~F~~R~~K~~P~~F~~I~~L~~Q~~T~~D~~A~~S~~E~~T~~A~~V~~G~~A~~I~~L~~T~~Q~~E~~D~~R~~G~~S~~E~~R~~P~~V~~V~~Y~~A~~S~~R~~K~~L~~L~~P~~V~~E~~R~~R~~Y~~S~~T~~  
 I~~E~~R~~E~~C~~L~~A~~I~~P~~W~~A~~V~~D~~H~~Y~~R~~Y~~L~~M~~G~~R~~E~~F~~K~~L~~I~~T~~D~~H~~A~~P~~L~~R~~W~~L~~S~~T~~A~~K~~T~~D~~N~~A~~R~~I~~T~~R~~W~~A~~L~~A~~L~~Q~~P~~Y~~E~~F~~Y~~I  
 V~~H~~R~~P~~G~~K~~D~~N~~A~~V~~**ADFLSR**C~~D~~G~~E~~D~~Q~~T~~G~~D\*

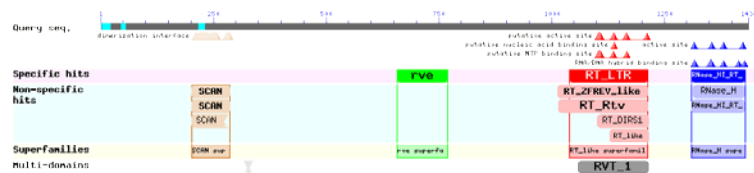

>Alligator Gmrl (AKHW01055145)

MMEAPDLASFANMQATAIIPADVLGQNLQAL~~T~~Q~~I~~L~~N~~S~~Q~~Q~~M~~L~~N~~R~~Q~~D~~W~~L~~Q~~H~~S~~L~~A~~S~~F~~K~~V~~P~~K~~M  
 T~~K~~D~~D~~D~~P~~E~~A~~Y~~I~~E~~A~~F~~E~~R~~H~~A~~L~~A~~I~~R~~L~~D~~K~~R~~Y~~W~~A~~S~~Q~~L~~G~~A~~L~~V~~V~~G~~K~~A~~Q~~A~~T~~Y~~R~~A~~L~~S~~R~~D~~D~~A~~L~~D~~Y~~E~~H~~V~~K~~K~~A~~  
 I~~L~~Y\*~~L~~E~~I~~N~~P~~E~~H~~Y~~R~~R~~Q~~F~~R~~A~~K~~K~~E~~P~~G~~A~~K~~Q~~P~~R~~V~~L~~L~~Q~~L~~L~~R~~D~~L~~L~~D~~K~~W~~V~~S~~P~~A~~G~~D~~R~~E~~A~~L~~V~~D~~H~~I~~V~~L~~E~~Q~~  
 F~~Q~~S~~D~~L~~E~~E~~R~~T~~Q~~R~~W~~V~~R~~Q~~H~~T~~P~~Q~~T~~C~~E~~E~~D~~L~~R~~L~~A~~E~~A~~F~~T~~A~~S~~E~~V~~Y~~P~~R~~E~~R~~R~~S~~Q~~G~~P~~P~~M~~T~~A~~P~~R~~E~~P~~E~~C~~R~~R~~L  
 P~~G~~Q~~G~~A~~T~~R~~D~~T~~V~~C~~F~~\*~~C~~G~~L~~K~~G~~H~~F~~S~~R~~E~~C~~L~~S~~Q~~T~~A~~E~~R~~W~~I~~P~~E~~G~~R~~A~~R~~A~~P~~A~~E~~R~~Q~~R~~N~~Q~~E~~L~~S~~K~~P~~M~~D~~C~~S~~Y~~A~~A~~  
 G~~R~~E~~D~~V~~A~~W~~R~~C~~P~~V~~V~~K~~A~~W~~V~~E~~G~~R~~P~~V~~R~~A~~T~~L~~D~~S~~G~~C~~A~~Q~~S~~L~~V~~R~~E~~D~~L~~V~~Q~~S~~H~~G~~R~~R~~M~~A~~P~~P~~M~~R~~I~~A~~C~~L~~H~~R~~D~~T~~K~~  
 Q~~T~~E~~R~~Q~~W~~V~~R~~L~~R~~V~~M~~E~~Y~~Q~~G~~E~~L~~L~~V~~G~~V~~V~~P~~R~~F~~A~~C~~E~~V~~L~~L~~G~~R~~D~~W~~E~~P~~I~~Y~~D~~V~~L~~D~~R~~V~~R~~D~~A~~E~~V~~A~~R~~K~~K~~I~~Q~~N~~R~~E~~  
 G~~W~~L~~G~~E~~I~~E~~E~~S~~E~~G~~S~~A~~D~~E~~T~~D~~A~~V~~D~~L~~S~~D~~L~~T~~S~~T~~L~~L~~F~~R~~E~~A~~Q~~E~~E~~D~~P~~E~~I~~R~~A~~F~~R~~G~~Q~~A~~Q~~G~~T~~G~~G~~T~~P~~A~~P~~S~~P~~E~~G~~  
 R~~P~~R~~F~~E~~V~~R~~D~~R~~L~~L~~Y~~R~~L~~Q~~R~~D~~R~~G~~E~~E~~T~~G~~S~~P~~Q~~L~~V~~V~~P~~D\*~~F~~C~~P~~A~~I~~W~~R~~L~~A~~H~~V~~N~~P~~T~~G~~G~~H~~L~~G~~R~~D~~K~~T~~L~~A~~R~~V~~S  
 R~~W~~F~~F~~W~~P~~G~~M~~G~~E~~E~~V~~A~~R~~Q~~C~~A~~C~~P~~N~~C~~Q~~K~~M~~R~~A~~E~~R~~P~~P~~R~~A~~P~~L~~Q~~P~~M~~P~~V~~I~~N~~T~~P~~F~~S~~R~~I~~A~~L~~D~~V~~V~~G~~P~~L~~P~~R~~S~~S



SGHQYILVMVDYATRYPEAIPLRAVTAPRIAEELIKWIARMGIPQEILTDQGNFMSGVL  
KAVCRTLQIKQLRSTV\*HPQTNGLVE\*LNWTIKWALRQCIQGDLLPLVFLTRDTPQDS  
TKFSPFELVLGHRP\*SLLOVLREWEQEGEGPSQEPKTYQ\*AFQRRIRLAQDLAQENLREA  
QTRTKGQYDRRAKEREFEPGQKVLVLLPTSTSKLLTQWQGSFEILRRVGPVDYEVHRPGH  
LREKQVYHVNLLWWEWREPEGWAAFSETDNKNLGPQGLGGEFEPFPPGGTPTVIGEESSAQ  
QREIRSLMNEFWFVREPEGWVRGLCHAIRTPPGAIVRERWQPIPHHLETIHREIDSML  
RLRVIRPSRSPWRSPLVPVRKPDGSLRLRVDRRLNAMAVFDAPFMPHVAELIERIGDSR  
YISTLDLAKGYWQIPVAKTDWLKTAFTGTPWGLYEFIRMPFGLHGAAAMFQCLMDQILAPH  
AEYTAAYIDDIIIIYTRTWEQHKSTLRAILTELRRAGLTANPQKCALAQKETKYLGFVLR  
GMIKPLTDKXETIXNFXAPQGCQRQLRSFLGLTNYRFRVPHFAELAAPLSEALKGWKTGA  
VRWTKEMMQSFERLKKALCEDVINHTPDFQKPFILQMDASETAVGAVFTQEEGNERPMA  
YASHRLLPAEKRYLTIERECLAIRWAVDHFYRYLMGREFTVVTDHAPLKWLSTAKTDNAR  
ITRWALALQPYKFRVIRHRSKANKVADFLSRCGDGDQIEDLGSRGKGPKPAGTTRMGNK  
EAPQGILRGGVMSQGRQG\*

## **Barthez clade** (in turtles and crocodiles)

### **>Chrysemys Barthez gag/pol (AHGY01367317)**

MANMLGLLGPGPAASSSGAAASANDWAKALGQILKVVLSHARSNSCR  
KLRLFAGAKKFEPWLEHTTEMLQKWAVPDAKKQRCLIESLSGPALNVIRTLKLIDPEVSV  
KDCLDALNHTFGSVEGPEDSYCKFLNSQQQIGEKISAYIQRLERLLQRAVMRGAVTAEQV  
DRTKLAQIVKEAQYQNSILLHLRLRKRKHPSPYSQLIKKVRKEEERQAASEFWEAQTL  
PAGTTPQLTASVLMVSTTEKLAQQVQLTERIAKLQSTIDRAKTSGNKEPLTVAIKKSAF  
RATIPSGRRGKQGFYCYQCGQNGHSAACKHNKKKPSLVYKLLKISWERSGSCQVRGQGP  
PRPAKFKDPSPKKDHAPGIPAGLIGPRAEVMVKIEGVECKAVLNTKSQVTIIFQSFYQQML  
RHLPIQPLTGVGLCGLSMNEYYPYQGYVIVHLKFPEKVAGVKEKVDTAALICPDPKGTSNV  
SVLIGTNSSLFKVLANYCKRRAGDQYLNTLMIHTLCAKAYKKIKGAKKETSCLPIGVLKY  
MDTTPLVVPPARMEQEVLSI STRLTGSKGALAMVEQPVKGLPKGVLVPSEVITLPAKAQK  
KVTILIANKTSQNVVVKQGGKIANLFEKPSIVKPKQCKTQVPPIDPAKFNFKNSPLSEK\*K  
NRLRRKLCKKSKVFSLHKWDVGCACKVKHNI RHLNRSRPFWKKSRKIALSEMEDVQHLQE  
LAANGIITESRSPYASPIVVVRKNEKIRMCINYCTLNRRTVVNQYTMPQVQDALDCLLE  
SQWFSVLDLRSYYQIPLGKNNKKTAFICPLGFYQFKRMPQEISGAPATFQRLMKKVVE  
NINLLQVLVYLDLIVFKRTLKEHKKTLKVLNRLKNYGLKLSINKCQFCRTSVKYVGH  
MSQEGVSTDPDKIEALTTWPCPSNYKELKTFGLGFSGYRKFVKNYATIVKPLNDLTREYQ  
SSRNKSKTKNKGSRPKPPVQRHYGPFKPFGRWNKRCKRAFQEIITCLTHAPVLVFNPS  
KPFILHTNASLEGLGAVLYQKVKEKRPVPPFASQGLSNSSETRYPTHKLFALKWAI  
TKKFRNYLYGAQFQV\*TDNNPLTYVLTSAKLNATGQKWAALASYNFSIQYQSGKSNVADAL  
SRRPQAPEVAVIPTNGVRAICSVSRREPESHKSLHECAAALGLPPECVPSASVNYIALD  
QSPPLMLNAADWQKAQLQINIRDTLLAKREGRSPALAKREGRSPAVVPPNPECKLLLK  
KWTKLKLIQEVHLQVTTNPLQKQRAQLVLPKEYRALAMRALHNNFKHLGMERTLKLIRSR  
FYWRPMKAVNRKCKTCAQCVQRKTLPTRAAYLKNITSNKPLELVCINFLSLEVDKRNIG  
NILLVVTNHYTRYAQAYPTRDQRATTVARVLWEKYFSVYEFPARIHSNQGRNFKSHLLKEV  
LRIAKIKKSRTTPYHP\*GDPQPERFNRTLLDMLGMLRPKQKATWSQHVAFLVHTYNATKN  
DATGVTPYLLMFGREPRLPIDLCFGVSEEGDSYETHQQYVSRLRKKLRDAYHLATSARK  
NANRNKHRYNARVRLQELQPGDRVLLRNLGITGKHKADR\*KAIPLYVMKKLGDLPVYKI  
KPENGGPQTKTVHRNLLPVGELVDTPKMGNHNRATGRNEGAGPKLPSNVDSQPPAANLP  
LCSTCKSKSKEEDTMMVYPMETKFSQSASKKSSSSSALNPMAEVFRIPDTPGSLVGP  
PCDNTHRLLDSGDIQVEDVLGTLDPPLLELELQGPMPVAEGPSKETSPSVVQEAVPSTTV  
TESLNKRNRVIRPVKWLTYNAPGVASKKPICLAHRLVEAKVGYLRPFGGNQ\*

### **>Chrysemys Barthez (AHGY01045193)**

IPLLWYVIVHLEFPEEIAQVGRQEVDTAALICPDPKGASDVSVLIGTNSSLYEVFADYCR  
QRAGDQYLNLTIVITHCAAAYRKIEDTRKVMSDLPVGALRYAVLVPLVVPAMTEKEVIVM  
STCLKDRKGTAVVEQPTTEGGLPEGVLVFSGVITLPAETQEEVTILIANETCRDVF  
VKPGQKIADIFEPETIVRQCEAEVPMVDPKTFDFGDSPLSEEWKDRLRKKTCCER  
SKVFSLHEWDVGCAGVEHHIRLQDPRPFRERSRRIALSEMEDVHHHLQELITNGIITES  
RSPYASPIVVVHKKRKSX  
RMCIDYRTLNRRTVDRYTVPRVQDVLWDLGSGWFSVLDLRSQYQIPLGEEDKEKTTF  
ICPLGFYQFERMPQGISGAPATFQCLMEKVVGDMNLLQVLVYLDVLI VFGRTLEEHEERL  
LKVLDRLLEDYGLKLSIDKQFCRTSVKYVGHIVSQVGVSTDPDKIEALTTWPCPSNYREL  
KTFGLGFSAYYRFRVKNYATIVKPLNDLTRGYQSSKN\*SKTKNKGSRPKPPVQRHYGP  
FEPFGRWDERCEKAFREIITCLTHAPVLVFAHQCKPFIHTDASLEGLGAVLYQVEVEGK  
RKPVAFASRGLSDSETRYPTHKLEFLALKWAI TEKFRDYLYGAQFQVWTDNNPLTYVLT  
AKLGATGQRWAALASYDFIIQYRSGRSNVDADALSRRPQAPGVAV IPTDGVRAI  
CSVSRREPEAHESLHGCAAEILGLSPECVPSASVNYIALDQSPPLMLNVADWQEAQLQD  
TDIRDTLAKREGRSPAVVPPNPEGKLLLEWTKLKLQGVLRVTTDPLQKQRAQLV

PKEYRALAMRALHDDSGHLGMERTLELIRGRFYWPWMAEDVRRKRETCARCVQRKTLPMR  
AAYLKNITSNKSLELVCIDFLSLEVDKRNIGNILVVDHYTRYAQAYPTRDQRATTVARV  
LWEKYFSVYGFPPARIHSDQGDGFESHLLKEVLRIAGIKKSRTTPYHPKGDPPQPERFNRTL  
LDMLGTLRPEQKATVSRQVAFVLVHAYNATKNDATGVTPYLLMFGQEPRLPIDLCFDASED  
GDSYETHQQYVSRLEKLDQDAYHLATSVARKNADRKNHRYDARVRLQELQPGDRVLLRNL  
GIAGHKHIADRWKAIPIYLVMEKLGDLVYKIKPEEGPGQTKTVHRNLLLPGELVGTPEY  
MGNHRATGQNEGDGPMPLPSNVDSQPLAANLPLCSTSESESESEEDTTMVYPGMEKRFQSR  
AESKESSSSSALNPMADVFRPIPDTPPEPLVGPCCDVCNGM\*

**env**

MEPAAIIAAVM  
TFVNTSHLI IHLFQRQMLRNRARLRQRSEDIKSERGMDSQSTGPRTV  
IMVAMGHVDAVERRFWARETSTDWWDRIVLQVWDESQWLRNFRMRKGTFL  
ELCELLSPALKRKTMLRAALTVQKQVAIAPWKLATPDSYQ\*VANQFVGV  
KSTVGVAVMQRVANAIVELELLSKVVTLGNVQVIIDGFTAMGFPCGGAI  
DGTHTIPILGPAHQATQYINRKSIFYSMVLQALVDHRGRFTNINVGWPGKVHDA  
RVFRNSGLFRRLQEGIFYPDHKITVGDVEMPIVILGDPAYPLMPWLMKPY  
TGALDSEKELFKYWLKSKCRKVVVECAFGRKGRWISLLTHSDLSETNIPV  
IAACCVLHNLCEKGETFLVGEVEANSLASDYAQPDSQVIRRAQRDALC  
IREALKARFQSEQGNL\*

**>Alligator Barthez (AKHW01075081),(stop codons repaired)**

Gag

MSNADQSAILSGSDGTVQGGAGQPAGIE  
ATPEWVRVFRQILQEVTHSSSDQAAYKRLRSFLRRLPVPAGEEGFDSWLSHIQETLLTWQ  
IPDEDKRCHLLEVLREPALGAVRTAKLWNPAAITTTQCMQVLRDAFGQPTGSGGAYYELLG  
TFHRKGETLSAYVLCLELVVQCLVTQGAFSVTDADQIWLWQICIGARYSSDLLRNLNLVG  
SRSSPVDFSYLLREIREEEEEISRLRDTMWAEDVSPQRGPMGRVLTVAPHEDTLLGVEPV  
ALALAAAVARTLPRGQPLPRPHASGGPWSHTCSRAPGFCYRCGELGHMARECTQPENPGL  
VFERLKGRWAAGNGEGAKQWSRLRSRSGPRQTPANYPQ\*

pol

MESAPLRTQTNSCKLPSVNSLPGKLVGSPSAEVPVTVNGHPC  
RAILD**SGS**QVTLIFESFYEEHLRLLPLPLTGLGLCGLSQEQYYPYRGFVNVRLKSPAETIA  
GVEEEVSTIALVCPDPGWMKATLIVGTNSSFFQVLARYCKQRAGPGYQQLTMHALCLE  
AYDFWEHREMWHPEVVGTLHFSGAKPQCVPAAQGWALPTVCNWI ERDEKNKLLVVEPT  
GRERPGVLRVPDGMIEETKGLNQDLTVIIVNPTLKDIVVHPGQKVALIKEAEVVSPEQEG  
NPPPIDPSRFLGGNSPVPEACKTQLRDKLGARARVSLHDWDVGEAKGVEHHIHLNRP  
FRERSWCIPLEMGVRRHLQELVDHRIITASKSPYAAPIVIVKKNQQLRMCIDYWTX  
AWTITDQYTVPRVQEAALDYLGVNKFVSLDLHSGYYQIPLREEDKEKTASVCPLGFYQFQ  
RMPQGISGAPTTFORLMEKVVGDHMTQVLV**Y**LDIIIFGKTLEEYERLLWVLDRL  
GLKLAIDKCKFCQASVKYIGHIVSQEGVSTDPEKVSAVTTWPRPKNFRELKRFLGFAGFY  
RQFVKDYATITGPLNALTGRHQGRSPRKKGNIGLNLPTVTRSPTEPFPGQWDSRCE  
DAFQEVIQWLTQAPVLAADPNHFFILHMDASLSGLGAVLYQEHGHWQPVAFASGVLSPSE  
TPYLHVKLEFLALRWAVTEKFRDYLNQTTQVWTDNNPLTYVLTCAKFDETGQHWITALA  
NYTFSLHYRVRQKNVDADALSRQLPSNPGSVWSPETVKTICDLQLQDPVGLRESTVCMTE  
MLGLPPEGIPQAWVQYSMLTPSLLPQVMATGWQTVQEQDQDREVLRARRSGNTRPMTLN  
NATPAAAYLLREWERLRLFDGVLPREVQDSEGWKYWLVLVLPQKYKALVLLALHDDFGHVG  
VERTLVLAHKQFFWPKMAEEVVRTKYSNCDQCVWRKTLPARTTYLHTIQSSKPMELVCTDF  
LAIEGEGHRKGNLVVTDHLTRYAQAFPTRDETGRTVAKVLWEKYFSMFGLPARIHSDQG  
RDFESRLLEHVLTVAGIEKTRTTPYHAQGDQPCEFCSSLLNMLGTVQEQKATWSQHIA  
YLHAYNSTRNDATGVSPYLLMFGREPRLPIDLCFGERVYHQHLTHGQYAQLRDHLCC  
AYRLAAETAGRNHQHRLNDAQVCEQGLKEGDRVLLRNLGLTGRHKIADWWRAEPTVV  
RQLGDLVVEIISPKSGPGQSCMVHRNLLLPIGELVGPPEPERELREERSRSPCRRRPHAT  
QPAVVPAAAPPEDSDSDWYPTDFHPSLGPATPQAEGETGTAARGAPSGETEGENIPTPLP  
ASGADSSSEREPKSLGPSWSPASDRTPRPNRELQPVHRFTYKARGCQGRSPSLPRGSSSP  
PG\*

**>Alligator Barthez (AKHW01033193)**

Gag

M\*TDNRNGCLAYSLDARGHR\*GSL  
GCNSRWGGPVPHPDSSGGESEEPSSRGAEDSVPAAPGESGVGFAPDPEWAKALGKALKE  
ALQPSPEVAVYKRLRIFSGKDPLPPEEETFEAWHSHVTFETLASWAVSEEEKQRQMLESL\*  
DPAFEVVRMLKQNSSILVRQCLELLSSVFGKSVQAKALFLEFNRTYQQKGTASAYILRL  
ERVLQQLVAQGGTLQEMASKAHLQQPRVGMLYDEQLVGEINLTGRRENPTFGQLLEIR  
EAESLQAVKASIKAVTPAPARGLAVAPCPP\*ALVVEMLKVPDFDNDAPQPLVVLHQQAQV  
TRGNQPRASQVPPAIR\*QWPHQPEEREKFCYRCGEDGHFKRQCTSQGNPPLVWQRLQATR

KQW\*

pol

MPHSH\*LCCTSKPR

\*HGEINP GPPKSHRLSGNGLTSLRKERNFVTGAGKTDISSASVQVRETRP WYGSDCRQQ  
GNSGETRVKSRPKSQLPPGSDSSGIPAWFPPGLVGPRAEVPVVI EGWKCIAVL**DSGS**QVT  
IIFQSFDFKFLKQLPLQSLTGLGLCGLSQAVYPYSGYVTAQLEFPKEVAGVCKSVAVTVL  
VCPDPKWMRGANIIVRTNSSLF\*VLTRHCQQKAGKQFLTALPMHALCAGAYQQIETSASP  
ETDVR LGALYYAGKTPEKVPAQGRQFLFTAPKRIARTHKKLAVVEPPKNSGPLRQMLVP  
SGVVDIGWQASSSVTVLVVNPTGKDIIVKPGQCVAELVEAEVAVSPTQSSQTQVVDPAKF  
NFGSSPVPAAWKTRLQEKLSARGNVF SVHEWDVGLAKGVEHSIRLQDTRPFWEHSR\*IAL  
SEMEDVRQHLELLDHGIISETRSLYASPTVVMRKKSGKIRMCIDYQTLNSRRTTVDQYTV  
CQE QDALDCLLGSQWFSVLDLRSSYYQILLAQEDKEKTA FICPLGFYQFEWMPQGISSAP  
ATFQR LMEKVVGDMMNTQVLV**YLLD**LI FRKTLEEH EERLLKVLDRLQAAGLKLALDKWQF  
CQMSVKYVGHIVSQEGVRTDPDKINAMATWPRPRNFQELKRFFGFAGYRRFVQNYAKLA  
KPLNDLTRGYQVRRSQIRSKGALS KATVGRPLGLQDPLESFGL\*WDENCEQAFRALIWSL  
TCAPVLVCADPQQPFLVHTDLEGLGAVLYQEHRGKLPVAFVSGGLVDSETQYPVHKL  
EFLVLKWA VTDKFKDYL YGTQFEVWTDNNPLTYVLTSAKLDATGHRWVAALADYRFSRLY  
RAGKKNIE**ADALS**QQPYKQEREIVTVDEVQSI CGLKERKTSEAESLPDCAA EVLGLPPDS  
VPQATVGYVTL DQSP LRLNAMGWRQAQ EADPDIKEILEK KKKGDL SK EFKPKTLGGQHL  
LCEWPRLRVVEGVLY\*MVTAPDVGTHKQLVLPQEYQTLAMRALHDDLGH LGV KRMLS LVR  
D\*FYWPGMARDVQKKCETCARCVQRKTLPTRTAYLNTISSSKPLDPVICDFLT IETDHN  
ISNVLI VTDHFTRYAQAYPTRDQRAITVAKVLWEKHFVYGFPEWIHSDQERDFESHLLR  
KIFQMAGIWKSQPTTPYHPQGD PQLERFNRTLNLMLGTLRNEQKDRWSQH LAFLVHVYNAT  
RNDATGASPYSLMFGWEPRLPIDLPGESGKGVKGRGR LSCRNCRGAAACCPETLGAQRQT  
PVPGSIHRPRAGTQTVPLPEIPHQQGCTRD PQNTVCK\*

## **Cigr2 clade** (only in crocodiles)

>Alligator Cigr2 (AKHW01064915) (stop codons repaired)

PFLEGLSREKVVVSQAGKLRQEVEKGPSTADTTTRDPQEDLVVKSAG  
LGYYLEGKLG RVP CQFL**DSGA**QVSLVHHQVWAQATTRI QSGLRPCSLVVKAAANGKTLPI  
LGEWGTSIYFQDLWLPCTFLVLEGARQDAFLGIDLVEQFQVTINFADCSFSLLGQCFPLY  
ITDSQNEVCEVAVEESWIVPPRSEMMIMGR LKGWCHKDEEGLFEPKPNKELGLLVGTAMV  
KSHWGEIPVCIANMSAEPQVAYQGTVIGTFETGIAVLQGD PVTQWSAAIRALSVDKNYHR  
GEPDENLQWTAGKLTCEFKLNHHGLEPEQEEAVQEVLP EYASIFSLRDHDLGRTGLTKRW  
IDMG SARPIKQGR RVP IYFQQEFDQQLQEMKERGYQALCQPMSCPRGACKERWRHAGL  
CGLPETERCYC\*GCLPQIDDTLNLNLLARARWFSTFDLASWYQVKVHLEDRAKTAFYTKKG  
LFEFNIMPFGLCNAPGTFQTLMDIILADLQGT SCLV**YLLD**IIIGQTFQKHLQKLVKAVLE  
RLREANLKIKPTKYQLFCREVNFMGHAI STEGVGPDPGKAETIKTWVPVQNVKELCSFLG  
QASYRRFVAGFATIASPLHKLSDKAKFIWTR ECQDAFQELKQRLMSSPVLAYPGQLPF  
VMDAHASDAGIGAVSSQVEEGEERV IAYASQTLNKAECCYVSTRKELLSIVALTKHFRHF  
LLGRHFTLR TDHSSLQYLHNFQQPEGQLARWLEWLV EFNHYHILHCPGQQHQ**NADALSRRP**  
HLVDSRLEGEAVGIQTL SIAEVAKSEAQE QPEVSNYQVGHHPKGQPWNANVLF CGPITME  
GDPGAATVALQPLPTGTGTAKSEPAPDVREDWWEKQKADAIKLTGWKEHESKEFPEEGQ  
YHPYLKQYQAVWPELSIRQGV RVRKLRSAQGP ECTQLVVP EQEILTILQDLHDSNTRGH  
LGI EKVSCKVQVWYFWL GWRQSVVDWCRSCEMCGMCKGARSNTRVPV VSTQARRPLEKIA  
MDLLGPLPTIPCGNKYVVLV VADYF SKRVEAYPLSDQEAQTVAKIFIEK FVRYHDT PQSLH  
ANQGRNFESQLFNHICD LLEINNNCTPYHPQRAI WHTN\*

## **Mag clade**

### **a) Mag/Jule subclade** (in tuatara, turtles and crocodiles)

>Chrysemy mag (AC239519)

MATLTGTLEPF DENIGQWHVYTERFEL  
FVIANDITEAKKVPVFLSVVGAKTYSLLRSL LHPVKPETKSYSDIVEILGSHFSPKPLVI  
AERYRVHKKRDQKEDETLVQFVATLRKLA EHC FEKEMLN DALRDR LVC DLYSEAIWKRLLT  
KAQLTLQKAVDIAVSMELATKKAQYI GASPRVHKV SQEP THKTVGSQECYRCGKPGHQAS  
ECWCKDLVCRHCGKKGHIECACKQKKKRSV VWPTRKGI LHTLEQTQDDQGD TSSQEEVPL  
HILSLAVGSHEYWVTPLLDGKPIRME**LDTGA**AVSLVSETVYKEKLQHLPLKATKT V LKTY  
KGEAVPMLGTIDVKVELNGQA AKLPLFVVRGNC PALMGRSWLGKIQLNWAEVHRMTKEET  
GLTTILRKHA AVFGEDLGS MKGITVTLN IKPN SPPKYLKARTVPYAIRPKVEADLERLVT

NGVLIIPVTHSPWATPIVPIVKKEGSLRICGDFKVTVNPVLCAEQYPFPCIDDLFAGLAGG  
 QKFCCKLDLSQAYLQMHVYEKSEQELLTIVTRKGLYQYCRLPFGITSAPALFQRAMDQILCG  
 LSGVQC**YLLDD**ILVTRNEEDHLKNLEATLQRLEEYGLRVLKDCKCEFFQPSVEYLGNIIDA  
 TGLHKAPAKVKAIVEAPPSSRNVSQLRSFLLGLLNYGKFI SQLATLLKPLHKLLGQNKAWK  
 CTEACDVAFNKAKDALLNSEVLTHFPDPSLPLQLACDASPYGVGAVMSHIMPSGEERP IAF  
 ASRPLSKAETNYAQIEREALGIIFGIRKFHQYLFGWKFTLLTDHRPLTSIFGPYTGIPPL  
 TASRMQCWALLLSAHTYEIKYRKSTLHGN**ADDLSRL**PLPVKHQDSAQKEIFTYFEQVENTP  
 IAATQIKKATRVDVPLSQVMDLVMHGKSRHTSPVSPDLVTYMSRRTLSIQSGCLLWGRR  
 VIIPPLRSQMLEQLHSSHSGIVRMKEIARSYFWWPRLDSAIEEKAKACMSCQGVRNASQ  
 WAPLHPWDW**PENPWKR**IHIDFAGPLEGSMFLVVVDAHSKWPEVSI**MQST**AESTIQKLR  
 LFSRFGLEPQLLSDNGPQFV**SQGFQNF**MKANGIHHTSAPYHPSTNGLAERFVQ**TMKQAL**  
 KSARGQSHSHSKLDTFLLSYRKTPHAMTKASPAFLMMGRQLDTCFDLLKPSEPRQIVQRQQ  
 QYQVIRRAPRAKDRTFSLGQPVLAQNYTSGAKWVPAMIITQTGPVSYTVRTAENLTWWQH  
 VDQLLPQDTSSELSDFTSSGETPNQESPVDCSPLLLPAVEIPLCLARADTTSSPVRA  
 ANPEPIVRPAPMVLLGATPPEFRCNPPRRDRPPQWLNL\*

>Alligator mag (AKHW01014103)

MGHIEEFDVSQLASWDSYAEKVFFYLYGANKVENPAQKHVILLTVCGAKTLAIVCSLPAPA  
 LPNTKSYAELIALLKAHF CRRPSVTLQRFNFFKQTQKANEGIADYLTDFHRLAEFCEFGD  
 LLDGLLHNCLICGVQDKAIQHCLLSEPNLTLATTQEKAFAAEAASHNVREIHQAFSSNVH  
 LLQKQDQEPDHHQIQIIPSPSTSPHKPINPQTCLSCGQHRQRECRFRKAECHACKKKGH  
 INRVCHLKASSRRQKDCSKCIHSQSTHRLESSPKREVQKLYLIQNVGVVETQGSEMIATV  
 VINGKKCKLEED**SGLEV**SLIDENTFCQLLWHPLSKLLKPECLSDYNGQSMETLGSCSVD  
 VQYGSVRQRLPLIVIKGSRKSLGRNWFSPLGISIQGVHSLCTESLERLAREFPQVFSNV  
 LGTYSGPPVMFQMDPAIAPIFMKSRNIPLALRPKIDAEGLLITQGVVEPIIHTSWATPI  
 VPVLKPKGSICICGDYKYTVNKALKQDPHPVPTIKQLLSVLVGGKVFALDLAQAYQRLI  
 VDDKAAEAQTIITHQGAFGVRCLQFGISVAPGIFQWFMEKMLAGIPRVVP**YFDD**VLMGP  
 SREKLTERRLEVLQRFDKAGVRVKREKQGLGVSSINLLGYQIDDSGIHPFEDKVKAIHDV  
 PIPKCNQDLQEFGLRNLNFYHIFLKDKAIEAPLHLLLDKGAQKWTCQHNEAFQGFKKLP  
 TSDSVLVHYQKPLSITCNASPFVGTVLSHTLLDGTDTVPVAFYSRTMTSTERNYAQID  
 KEALAI IAGVKKIHNYVYGHKFEIRIDHKPLLRIFTTDKPTPILSPCMQHWSIMLNAYDY  
 ILMYKPGKTIAN**ADALSRL**LPLQIPDCTTPLPAEVLMLLESMP EAPLQDDQIARITEKDSIL  
 ARVLNWWVRGSPADKLAEEFRPFSSCQHEL SAHGKCF LWGNRAI IPEAGHQI ILLTTLHAA  
 HPGIVRMKSLVRSYVWWPGMDSIERVVRERSTCQATHHNPTTAPVFPWEMQRNPLSRIY  
 IDFAGPFQGNFLIVVDSYSKWLEVIITVSTLTSTATITALCQLFATHGMPDTIVSDNGSA  
 FTSLEFQDFASCNLIQTVTIAPRRPQTNEGQVERMVQTMKGALKRIVVGDWATRLARFLF  
 AQHVIPCPPTGGSPSELLMGCCLKTCLDLVNPDLVRDMQFRKEKELDSALESGLPLCLFIP  
 QETVFAQNYGTAPQWTKSKIVSATGPVSYTDNGQVWRRHMDQPCGRSPTDNPTPEQASST  
 YPPPTDMSLEKYLVPSTNANPLLSPSEGSVAVESSDRLIGPSFAELITEPGSMGRPQWK  
 WSPPKWLAN\*

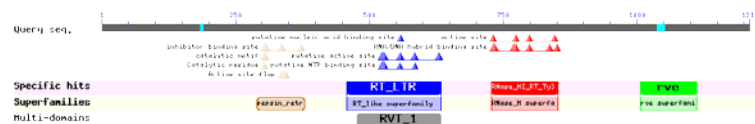

>Sphenodon mag (AC154075) (just a fragment of the full length element)

MSQREFMDSFDNTVEDWSTYIERLEQYFALHDTDDKVPALLNYMGKTYRLLRSLTYP  
 NKPCTKTFAEIVTLLQEHSSPKPLETAE\*FRFHKRNQOQGETVMAYGVALQRLAEHCNFG  
 NTLQMDLRDQLVCGIRDETIQKSLTSETLSFKKAMEIATSMEAATRESQEFQAVSRSEN  
 ATHKXXXEKCSYCGKGGHKS MFCRFQNVVCWHCGKKGHIQAACRSTPNKIKSEKKKTP  
 EGHHRVHAIETETDSSEEDLAELS IAYVRVSCVEDGDKEPI\*VTPIVEGKVLK**MELDTGS**  
 AVSVIPHKEFTKQFSNVQLRKRTRTILKTYTEERIXXLGVCTVEVKYNGQSNKLDLYVVP  
 RGPALFGRSWLKKIRLDWQSIKALQVHQKSTSHQQLLELFAKAAPVFQKGIHGLRDIKAS  
 ITLIEGAQPKFLKARQVPLGIREAVAKELEWLEGMGIITKVDWSEWTPVVPVIKKNGLT  
 RTCGDFKVTINPVLRTHEYALPCIEDIFLSLARGKFKSKDLAQAYLQMEVEAESRKFLT  
 ISTEKGLFQYN\*LVFGVASAPALWQRAMDQVLQGI**PSRCRYLDDI**IVTGSNDEDHLKNLA  
 QILKRLEEYGLRVNEDKCEFFKEAVTYCGHIIDSERLHKSPKETHAVLRAPHENISQVR  
 SIIIGFVNYFHKFLPNIAIVLHPLNQLWKGKHW\*TELCERAFQEAKKLVTSQVLTHTYN  
 PELEILLACDASAYGLGAVISHAMPDQCEPIAFASRSLSAECNYAQIDREALSLVWGV  
 KFRHYLYGRKFTLVTDHKPLLSIFNPSKGIPEMAAAQIQRWALFLGAHKYDVKFKGTSQ  
 HSN**ADGLSHL**PYERQVMPQRNKMHSRLGSCSRCSACHPQLQPALYKFSEAFLEQGCYKLL

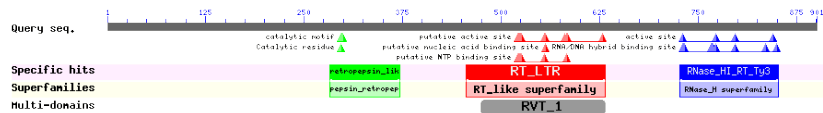

## b) New Mag subclade (in turtles only)

### >Chrysemys new Mag gag/pol (AHGY01516055)

MLHVI IRTGSTGCWESERTGNRKEEGVKEAGRVTCAATAWKRFHCK \*SSVEV  
 VNTLLGGCNILATRIALLPLNPPAPFLQSPGEPPIAFTVWIHMFFETYLAIASATDISEVR  
 KHALLIHCLGAEGQHFYFTFPLADDKYETALTALKNFFVPMNVVANFYRFRQREQKPGE  
 TIMQYIASLRLIATCDFGNMADEMIRDQLIEKTIMLRVRQRLLLEPQLTLKAITIATQ  
 IESATAEAKIMSKDTGGPVQTVPLQKSSLSLQTNCKRKTNEKPLNQMQNTVKAFC  
 GSPQHLANYTECPAKVAQC�NHCKKIGHFAKVCCSSQFNQQVHAVTIPDVTVLSVDKITT  
 HIPEQIKYTVNVS AIPSGKSHSIQLMLDTGS AVSILPDSIYLHYFKDVPLTEPKLHLVCY  
 LKNHLPVHGCLPAIVTFGDR CITAEFYIVHKGTPILGRDLLAALNLRVVNGRIDLPQQST  
 LAVHTPASAGTQLQVEEKLSCAYGFLHKVKMRNLLPVRQKLWCLPFSVREAVSEELRKL  
 VQKDIIEEINSSEWVSPIVVTHKGGDIRLCVDLREPNAIVIDSHPLPHIEEVFAELRG  
 AKMFSTL DLQSAHYQVMLHEDSRDLTAFITQEGLFRFKRVPYGLASAPSAFQKMSLILK  
 NQHGVQC YLDDIIVFGNTTEEHENNLQSVLNCISKAGLKLNRSRCKFRQTELSFLGHTIS  
 QAGLKPDPDHILAI SNAPPPTDLQTLRSFLGLTSWYAKFIPNYASFIEPLRELLWRSSTL  
 VWTDAQV SFERVKDLIVHSPVLALFSPALPTIVTTDASDYGAVLTQLHEDNTERIVA  
 FASRTL SNAERKYS TVEKEALACVWATEKWRTYLWGRTFKFR TNHSPMLTLLTMKGLGRA  
 GYRIARWSARLLS FNYELEYKPGNQNVVADCLSR LPLPSPDGPPEDEDVVVALITSTLTA  
 VTIEQFQAACSACPIQQKREFLTRWSSNPKNLDPVLLPYFRVRDELSLLDGCVLRGTH  
 RLLVPEELQSKLIHLAHNTHQGI VRTKQGLRDLYWVPGMDSQTEALIKSCITCQMHDKTA  
 VTCIPPLQPVP LPESAWEKVAIDIVGPFDTAPIDCHYAITLIAYFSKWLEVAFTLQICSA  
 IVIKFLSSFFSREGNPKKLVSDNGSQFTSLEFETF LAERNILHRRSSLYYPQASGEIERF  
 NRS LKESLQTAKLEGRLWISFTTDFLQASCHAVMQRSPAELLHGKQMTTKLNIAGLLKA \*  
 PDAPNKDDVRKTV EQNAKSKAFTDKQRGAKEPKFECGSFVRIRKPGI LRKGDHKFTAPL  
 KII EKKG P YTYRLSDGRVWNASYLPPAYAPRGDYANTQSALDDSTVEPTQONIALELGL  
 LE RWPVRFRRPPAWTKDYVM\*

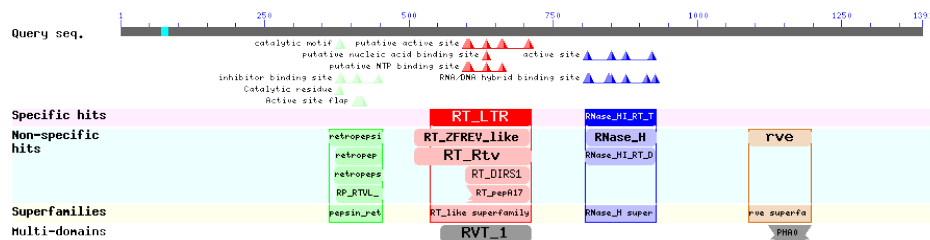

## c) SURL subclade (in all reptiles)

### >Anolis SURL (AAWZ02012013)

MESFRPPPLAMQGNLAENWRRWEQAFQLYLAAAGLENVSKKRQIAILLHCVGE  
 EGVSLYNTFDFAEENPKDIAEVLEQFRTYFLPRKNIIVFERFCFWNHMQSPGVTNVQFIAE  
 LK LKAASCEFGMAVNEMIRDKVVVSLQEQEKLKQKLLQEADLTLEKAVEICRVDETTRAQL  
 RTMAITSEEGVFELQDSHGENREIITQALGTRESRHRDNWKNQKCGYCGTAHEPRCPA  
 FGKTCNKCGKKNHYARLCSRVTNPVNIQARQHIHELNVSNLMIGKLEEMKDTQITNKA  
 GWYADISIRDCI IKFKLDTGAEANVLPFSIFSRIPGAKQMSKSKVVVLA YGGTKIQPMGA  
 VEFDCITAKGVYNLLFVYVTD CSTPTLLGR PACENLGLIYRVDLIQAEGLLTQEKLLSLYP  
 EVFQGLGEFGQHIIIHTDPTMVPVIQGCRRVPFAIHDRLKD TLDQ MENMGVITKVVGP TD  
 WVSSLVITEKKNGLSRLICLDPRLNKAVRRQHYTIP TVEEVL SHLAGK IFTI IDEKDSY  
 WQVKLDKASSRLCTFNTPWGRYCFNRLPFGLKSSSEVFQKNQETF GHIKGVYMIADDMI  
 IAEETSKQHDEILHQV METARVNKIKFNKEKIQFRVNSVRYMGHIVTAE GVRPDTEKVK  
 IAEMKPPNDRQGVLRFLG SVYLAKYIPKEAELTAPLRSL LKKNMSFQWMPHEQKAF EAI  
 KQKLCDA PVLQYF DVTKPVVIQADASKDGLGACLLQDNKPVSYASRALSSAEKNYAQIEK  
 ELLAVVYAVQKFHQYVFGKMLV LQTDHKPLES IYKKPIGSAPARLQRMLLQLQKYQLNFV  
 YTPGKLMYLADTL SRATVDH PGSQENPIGDEKVIYEVNTLAMHPDKMGLIQEATKRDPQL  
 RMIQTYLNQGWPKYMRKVAPIAKSFWPVKDHLYRVDGALFMGERI IIPASQRQNVLAQLH  
 ESHQGIQRTKERARQLMYWPGMSKDI ESAVGSFCVACAFAPNNQKEPLKPH EIPGPWQK  
 VGVDIFEQDNRSFLLVIDYFSKYPEVVS LHDKTARTVIVKMKSVFARHGTPLIVVSDNMP

FASQEFKVF~~FAKE~~WGF~~EQCF~~SSPGYPQSN~~GM~~VERAIQSIKQLTHKVGKARGDLYAALLEYR  
NTPVTGLSYSPAQIILMGRMLRSLKLPITTDLLCPRIPIINVHQLQRAQERQKHFYDR~~TARP~~  
LKPLREGDLVWVMSNNCKERWLPVAVVIEKCKQPRSYLIKNDGRVYRRNRRLKQ~~RNQTP~~  
ETTIQGN~~TTY~~NGSKGMFVNKSDAHV~~I~~ADRKPTYVTSHGRPVFEPVRYIP\*

>Alligator SURL (AKHW01056905)

MEGLKPSGQLHFNTKSLAQAWKQWQEF~~S~~LYTELT~~MAD~~KEEKMKVMLFY~~Y~~LVEKGC~~EV~~S  
VTLMESNPDTLKQLIEAFDACC~~DP~~RKNETVERYQFF~~T~~Q~~N~~Q~~EEEE~~EGIE~~T~~CITALK~~T~~LASSC  
NFGNIKDSLIRDRI~~V~~CGTWDSALRERLLKEVDLTMEKCHQIARA~~A~~ELSKQRIK~~M~~ISTATC  
TEQVHRLNLKDSGKEE~~PD~~RPTANTYS~~M~~IECIYCGKLHERRKDKCPAYGKECKKYGKKNHF  
RGLCRSHRNRKKT~~V~~HAVMRDQET~~T~~DEEEAFSVNL~~T~~DSQ~~T~~HRKGF\*~~T~~RKLA\*\*~~L~~FSNHLGW  
SNKRYQI~~H~~PRNLV~~C~~QI~~H~~R~~I~~HTLQKNVGNNSAIFAT~~M~~MLEQRPIRFQ~~V~~DCVATCNVLPVNL  
LSSSIRMEKCHYVLLKYNKITVRPLGKCQLTIINPRNKKQYQLKFI~~V~~IDRAGTHPL~~L~~DSW  
TAQAMDLITVQH~~H~~NI~~L~~QVTEEQEW~~S~~LGSLPNILLRYGDI~~F~~QGTGLFKGK~~L~~KLEIDPQV~~Q~~  
VQLPKHRVLLALLESLK~~K~~ELTNLQK~~K~~GIITPVEKSTDWISSLVVVRIPSGKLRICIDPKP  
LNRALKKSHYPLPAIEAVLP~~D~~LSRAKVCTVCDVKN~~G~~FWHVELDKSSHLTTF~~S~~MPFGRYRW  
LRMPMGI~~S~~PALKV~~F~~Q~~Q~~KL~~N~~QELEGIKI~~V~~ADDILVIGD~~G~~DDKD~~H~~D~~T~~KLQ~~Q~~LLNRCRERNIK  
LNANKIQ~~L~~RRTEVPYI~~G~~HLLTSEGLR~~P~~DP~~E~~KVRAIMEMPRPQDVKG~~V~~QRLIGRVNYLSKF  
CAYLSNACEPLRLLTH~~N~~DA~~A~~WEWAQTQE~~E~~AFKRIKKLISEAPILKY~~N~~TAKQLVLQ~~C~~DVS  
EGGLGAVLMQKQQLVAFASRAMTETERR~~Y~~AQIEKELLEVLFGLEW~~F~~HQFTFG~~Q~~RVDVQSD  
HKPLEIIMKKPLLSAPKRLQCMLLRLQAYDM~~N~~IKYYPGKSLQV~~A~~DTLS~~R~~AYLPECST~~D~~GS  
VEQETIESINMVQDLPIFKSS~~L~~KAIQQSMEQDGV~~L~~QAVKRTILEGWPQHKAQV~~P~~PEVAAYY  
QWRDEQCTQDGILFKGDRVVI~~P~~AALQ~~R~~DIMNRLHASHMGI~~E~~SCLRR~~A~~WECIYWP~~G~~MNAHL  
RTYMEQCEVCKEYSDKQ~~Q~~KETLNPHDIPSWP~~W~~EKVG~~T~~NLFNVNDRNYTV~~T~~VDSYSN~~F~~WEV  
DYLEDTQARTVIRK~~L~~KAHFAWHGILDTV~~L~~SDNGLQYTSRE~~F~~KQ~~F~~CTKWEFQ~~H~~KTSSPGYP  
QSN~~G~~KAEP~~A~~VKTAKRLLVKAKKTAGDPYLALLDHRNTPSQ~~G~~MDSSSPAQSLMGWRIK~~T~~LL  
PVRDCLLQPQRGRGNSSW~~Q~~LKKQ~~Q~~SQ~~V~~SQYNKEARDLRPLRRGEK~~V~~VWVQPVSPHVKEW  
QKATVEGAVGDRSYEVVIDSGQCLRRN~~Q~~KQLRSAGRVEIQVSKRFQ~~D~~Q~~D~~QDNFDNWSVIS  
EPQIGEKDAMDSTKERGTQAESSLQNKDM~~D~~DRTEAGVAPRKIN\*

**Supplementary File S3. Transcription factor binding sites in promoters of human and mouse RDDGs.**

**Chromovirus-related RDDGs**

**LDOC1:**

Homo: AP-1, ATF-2, AP-2gamma, FOXL1, Egr-4, COMP1, AP-2beta, c-Jun, AP-2alpha, AP-2alphaA

Mus: Elk-1, Meis-1, Meis-1b, HOXA9, HOXA9B, Nkx5-1, SEF-1(1), p300, POU3F2, Nkx6-1

**LDOC1L:**

Homo: NF-1, Tal-1, CUTL1, Tal-1beta, E47, NRF-2, COMP1, STAT3, ITF-2

Mus: RFX1, PPAR-gamma1, PPAR-gamma2, HOXA9, HOXA9B, Meis-1, Meis-1a, c-Myb, Meis-1b, POU3F2

**RGAG4:**

Homo: E2F-4, E2F-3a, E2F-5, E2F-2, Egr-4, MZF-1, E2F, E2F-1, COMP1, Pax-4a

Mus: XBP-1, Cdc5, IRF-1, PPAR-gamma1, PPAR-gamma2, HTF, CUTL1, NCX/Ncx, HEN1, GR

**FAM127A:**

Homo: Elk-1, Nkx5-1, c-Ets-1

Mus: -

**FAM127C:**

Homo: Elk-1, Nkx5-1, c-Ets-1

Mus: -

**PEG10:**

Homo: C/EBPbeta

Mus: -

**ZCCHC5:**

Homo: Sox5, PPAR-gamma1, Olf-1, FOXO1a, PPAR-gamma2, HNF-3beta, Arnt, FOXO1

Mus: POU3F2, POU3F2 (N-Oct-5a), POU3F2 (N-Oct-5b), POU2F1, POU2F1a, Bach1, Pax-6, Brachyury, Evi-1, Roaz

**ZCCHC16:**

Homo: Sp1, RREB-1, NF-YA, HNF-3beta, NF-YB, CBF-A, CBF-B, CP1A, NF-Y, CBF(2)

Mus: PPAR-gamma1, PPAR-gamma2, C/EBPalpha, LCR-F1, RREB-1, HNF-4alpha1, HNF-4alpha2, FOXD1, NF-E2, NF-E2 p45

**RTL1:**

Homo: AML1a, Pax-5, Olf-1, MyoD, E4BP4, C/EBPalpha, FOXJ2 (long isoform), FOXJ2

Mus: FOXC1, ARP-1, HFH-1, RP58, STAT1, STAT1alpha, STAT1beta, STAT2, STAT3, STAT4

**RGAG1:**

Homo: STAT5B, AP-4, CUTL1, Evi-1, MEF-2A, SRY, POU2F1, POU2F1a, aMEF-2, RSRFC4

Mus: LCR-F1, GCNF-2, GCNF, GCNF-1, POU3F2, aMEF-2, MEF-2A, MZF-1, PPARalpha, Roaz

**C22orf29:**

Homo: E2F-4, E2F-3a, E2F-5, E2F-2, LCR-F1, C/EBPalpha, CHOP-10, E2F, E2F-1, Pax-4a

Mus: -

-----

**PNMA family**

**PNMA1:**

Homo: E2F-3a, E2F-4, E2F-5, Brachyury, HSF1 (long), E2F-2, E2F-1, E2F, HSF1short, ATF

Mus: ZIC2/Zic2, Roaz, Nkx3-1v1, Nkx3-1v2, Nkx3-1v3, Nkx3-1v4, Nkx3-1, Msx-1, Zic1, RFX1

**PNMA2:**

Homo: AML1a, Pax-5, MyoD, Lmo2, AP-4, GATA-1, Egr-4, FOXL1, HEN1

Mus: NRSF form1, NRSF form2, GATA-1, ITF-2, Tal-1beta, HSF1 (long), HSF1 (short), YY1, MyoD, C/EBPalpha

**PNMA3:**

Homo: E2F-3a, E2F-4, E2F-5, SREBP-1c, E2F-2, SREBP-1b, E2F-1, E2F, SREBP-1a, HOXA5

Mus: ATF2, CRE-BP1, ATF, Ik-3, c-Jun, RP58, NF-kappaB1, Roaz, ISGF-3, p53

**MOAP1:**

Homo: AML1a, ATF-2, NF-kappaB, FOXL1, AREB6, IRF-2, NF-kappaB2, Meis-1a, NF-kappaB1, RSRFC4

Mus: Evi-1, ZID, c-Myb, STAT3, POU3F1, FOXJ2, FOXJ2 (long isoform), Nkx3-1, Nkx3-1 v1, Nkx3-1 v2

**PNMA5:**

Homo: COUP-TF1, LHX3b/Lhx3b, C/EBPbeta, AML1a, HNF-4alpha2, HNF-4alpha1, GATA-2, COUP-TF, CP2, LHX3a/Lhx3a

Mus: Nkx6-1, Evi-1, HSF1 short, HSF1 (long), Nkx2-5, NF-kappaB1, Pax-2, Pax-2a, SREBP-1a, SREBP-1b

**PNMA6A:**

Homo: CREB, SREBP-1a, deltaCREB, SREBP-1c, MyoD, NRSF form 2, SREBP-1b

Mus: -

**PNMAL1:**

Homo: ER-alpha, USF1, USF2, USF-1:USF-2, GATA-1, POU2F1, POU2F1b, POU2F1a, USF-1, POU2F1c

Mus: -

**PNMAL2:**

Homo: AhR, NF-1, Pax-5, Lmo2, Arnt, E47, AREB6, STAT3, Hand1, MRF-2



Mus: -

**ZCCHC12:**

Homo: GR, GR-beta, Nkx2-2, Meis-1b, POU2F1, POU2F1a, c-Myb, GR-alpha, Meis-1a, Meis-1

Mus: POU2F1, POU2F1a, POU2F2, POU2F2 (Oct-2.1), POU2F2B, POU2F2C, Oct-B1, oct-B2, oct-B3, Pax-3

**ZCCHC18:**

Homo: STAT5B, AP-1, XBP-1, STAT5A, NF-E2 p45, POU2F1, GATA-6, POU2F1a, Zic3, NF-E2

Mus: Pax-3, GATA-1, Olf-1, GR, GR-alpha, CBF(2), CBF-A, CBF-B, CBF-C, CP1A

**CCDC8:**

Homo: NRSF form 1, Nkx2-5, NRSF form 2, AP-2gamma, Ik-2, HSF2, AP-2beta, AP-2alpha, Hlf, AP-2alphaA

Mus: -

----

**ARC:**

Homo: Sp1, NRSF form 1, STAT5A, NRSF form 2, NF-kappaB, NF-kappaB1

Mus: SRF, SRF (504 AA), HOXA9B, Meis-1, Meis-1b, HOXA9, SREBP-1a, SREBP-1b, SREBP-1c, E47

----

**Retroviral protease-derived RDDG**

**ASPRV1:**

Homo: Max1, AML1a, MAZR, NCX/Ncx, Pax-2, Pax-2a, LCR-F1, ATF6, c-Myc

Mus: ARP-1, FOXD1, HNF-1, HNF-1A, SEF-1 (1), ROR-alpha2, NF-kappaB, NF-kappaB1, RelA, Lmo2

---

**Integrase-derived RDDGs**

**GIN1:**

Homo: AML1a, POU3F2 (N-Oct-5a), POU3F2 (N-Oct-5b), CUTL1, POU3F2, CREB, deltaCREB, Meis-1a, Meis-1

Mus: -

**NYNRIN (KIAA1305):**

Homo: ISGF-3, Ik-3, HEN1, Evi-1, GATA-1, GATA-2, GATA-3, LyF-1, HNF-4alpha1, CREB

Mus: -

**KRBA2:**

Homo: HOXA3, AML1a, GCNF, GATA-1, C/EBPalpha, AREB6, Nkx6-1, GCNF-1, COMP1, IRF-7A

Mus: -

**SCAND3:**

Homo: RFX1, NRSF form 1, Olf-1, NRSF form 2, TGIF, MRF-2, Roaz

Mus: -
