# Supplementary material for: Genesis and Regulatory Wiring of Retroelement-Derived Domesticated Genes: A Phylogenomic Perspective
Source: PubMed Central journal article supplement — Mol Biol Evol. 2013 Jan 24;30(5):1015–31. doi: 10.1093/molbev/mst014 (PMC3670739; doi:10.1093/molbev/mst014), 2013-01-24
Supplement: supp_mst014_Supplementary_Tables.pdf [file supp_mst014_Supplementary_Tables.pdf]

**Supplementary Table S1. RDDGs reference set used in phylogenetic analysis.**

| Gene                          | Organism                              | Taxonomic group   | Protein/nucleotide accession number | Chromosome (location) |
|-------------------------------|---------------------------------------|-------------------|-------------------------------------|-----------------------|
| <b>PEG10</b>                  | <i>Ailuropoda melanoleuca</i>         | Boreoeutheria     | ACTA01043706.1                      |                       |
|                               | <i>Bos taurus</i>                     | Boreoeutheria     | NP_001165989.1                      |                       |
|                               | <i>Callithrix jacchus</i>             | Boreoeutheria     | ACFV01062247.1                      |                       |
|                               | <i>Canis lupus familiaris</i>         | Boreoeutheria     | NP_001166014                        |                       |
|                               | <i>Cavia porcellus</i>                | Boreoeutheria     | AAKN02016859.1                      |                       |
|                               | <i>Choloepus hoffmanni</i>            | Xenarthra         | ABVD01060229                        |                       |
|                               | <i>Dasybus novemcinctus</i>           | Xenarthra         | AAGV03171820.1                      |                       |
|                               | <i>Dipodomys ordii</i>                | Boreoeutheria     | ABRO01072656.1                      |                       |
|                               | <i>Echinops telfairi</i>              | Afrotheria        | AAIY01557043                        |                       |
|                               | <i>Equus caballus</i>                 | Boreoeutheria     | NP_001166029                        |                       |
|                               | <i>Felis catus</i>                    | Boreoeutheria     | AANG02100824.1                      |                       |
|                               | <i>Gorilla gorilla</i>                | Boreoeutheria     | CABD02345544.1                      |                       |
|                               | <i>Heterocephalus glaber</i>          | Boreoeutheria     | AFSB01016640.1                      |                       |
|                               | <i>Homo sapiens</i>                   | Boreoeutheria     | NP_055883                           | 7 (7q21)              |
|                               | <i>Ictidomys tridecemlineatus</i>     | Boreoeutheria     | AGTP01068175.1                      |                       |
|                               | <i>Loxodonta africana</i>             | Afrotheria        | AAGU03015863.1                      |                       |
|                               | <i>Macaca mulatta</i>                 | Boreoeutheria     | NP_001165893.1                      |                       |
|                               | <i>Macropus eugenii</i>               | Marsupialia       | ABQO020785483.1                     |                       |
|                               | <i>Microcebus murinus</i>             | Boreoeutheria     | ABDC01270285.1                      |                       |
|                               | <i>Mus musculus</i>                   | Boreoeutheria     | NP_570947                           |                       |
|                               | <i>Mustela putorius furo</i>          | Boreoeutheria     | AEYP01068702.1                      |                       |
|                               | <i>Myotis lucifugus</i>               | Boreoeutheria     | AAPE02008825.1                      |                       |
|                               | <i>Nomascus leucogenys</i>            | Boreoeutheria     | ADFV01000933.1                      |                       |
|                               | <i>Oryctolagus cuniculus</i>          | Boreoeutheria     | AAGW02035426.1                      |                       |
|                               | <i>Otolemur garnettii</i>             | Boreoeutheria     | AAQR03012733.1                      |                       |
|                               | <i>Pan troglodytes</i>                | Boreoeutheria     | AACZ03052811.1                      |                       |
|                               | <i>Pongo abelii</i>                   | Boreoeutheria     | ABGA01007342.1                      |                       |
|                               | <i>Procavia capensis</i>              | Afrotheria        | ABRQ01517954.1                      |                       |
|                               | <i>Pteropus vampyrus</i>              | Boreoeutheria     | ABRP01146153.1                      |                       |
|                               | <i>Sarcophilus harrisii</i>           | Marsupialia       | AFEY01088593.1                      |                       |
|                               | <i>Sorex araneus</i>                  | Boreoeutheria     | AALT01650199.1                      |                       |
|                               | <i>Sus scrofa</i>                     | Boreoeutheria     | NP_001120696                        |                       |
|                               | <i>Trichechus manatus latirostris</i> | Afrotheria        | AHIN01116204.1                      |                       |
|                               | <i>Tursiops truncatus</i>             | Boreoeutheria     | ABRN02490409.1                      |                       |
|                               | <b>RGAG4</b>                          | <i>Bos taurus</i> | Boreoeutheria                       | AAFC03124894          |
| <i>Callithrix jacchus</i>     |                                       | Boreoeutheria     | ACFV01168828.1                      |                       |
| <i>Canis lupus familiaris</i> |                                       | Boreoeutheria     | AAEX03026494                        |                       |
| <i>Cavia porcellus</i>        |                                       | Boreoeutheria     | AAKN02029999                        |                       |
| <i>Dasybus novemcinctus</i>   |                                       | Xenarthra         | AAGV03221368.1                      |                       |
| <i>Dipodomys ordii</i>        |                                       | Boreoeutheria     | ABRO01238289.1                      |                       |
| <i>Equus caballus</i>         |                                       | Boreoeutheria     | AAWR02039660.1                      |                       |
| <i>Felis catus</i>            |                                       | Boreoeutheria     | ACBE01497584.1                      |                       |
| <i>Gorilla gorilla</i>        |                                       | Boreoeutheria     | CABD02400541.1                      |                       |
| <i>Heterocephalus glaber</i>  |                                       | Boreoeutheria     | AFSB01128218.1                      |                       |
| <i>Homo sapiens</i>           |                                       | Boreoeutheria     | NP_001019626.1                      | X (Xq13.1)            |
| <i>Loxodonta africana</i>     |                                       | Afrotheria        | AAGU03048013                        |                       |
| <i>Macaca mulatta</i>         |                                       | Boreoeutheria     | EHH30837                            |                       |
| <i>Microcebus murinus</i>     |                                       | Boreoeutheria     | ABDC01193954.1                      |                       |
| <i>Mus musculus</i>           |                                       | Boreoeutheria     | NP_899141                           |                       |
| <i>Mustela putorius furo</i>  |                                       | Boreoeutheria     | AES05561.1                          |                       |
| <i>Myotis lucifugus</i>       |                                       | Boreoeutheria     | AAPE02004103                        |                       |

|              |                                       |               |                 |              |
|--------------|---------------------------------------|---------------|-----------------|--------------|
|              | <i>Nomascus leucogenys</i>            | Boreoeutheria | ADSV01127123.1  |              |
|              | <i>Ochotona princeps</i>              | Boreoeutheria | AAVZ01235013.1  |              |
|              | <i>Oryctolagus cuniculus</i>          | Boreoeutheria | AAGW02057529    |              |
|              | <i>Oryctolagus cuniculus</i>          | Boreoeutheria | AAGW02057529.1  |              |
|              | <i>Otolemur garnettii</i>             | Boreoeutheria | AAQR03185996    |              |
|              | <i>Pan troglodytes</i>                | Boreoeutheria | AACZ03139484.1  |              |
|              | <i>Pongo abelii</i>                   | Boreoeutheria | ABGA01327151.1  |              |
|              | <i>Procavia capensis</i>              | Afrotheria    | ABRQ01198437.1  |              |
|              | <i>Rattus norvegicus</i>              | Boreoeutheria | AABR05180029.1  |              |
|              | <i>Sorex araneus</i>                  | Boreoeutheria | AALT01549896.1  |              |
|              | <i>Trichechus manatus latirostris</i> | Afrotheria    | AHIN01073765.1  |              |
|              | <i>Tupaia belangeri</i>               | Boreoeutheria | AAPY01750682.1  |              |
|              | <i>Tursiops truncatus</i>             | Boreoeutheria | ABRN02257176.1  |              |
| <b>RGAG1</b> | <i>Bos taurus</i>                     | Boreoeutheria | XP_001788607    |              |
|              | <i>Canis lupus familiaris</i>         | Boreoeutheria | AAEX03026772.1  |              |
|              | <i>Cavia porcellus</i>                | Boreoeutheria | AAKN02039973.1  |              |
|              | <i>Dasybus novemcinctus</i>           | Xenarthra     | AAGV03179636.1  |              |
|              | <i>Equus caballus</i>                 | Boreoeutheria | AAWR02039240.1  |              |
|              | <i>Felis catus</i>                    | Boreoeutheria | ACBE01502664.1  |              |
|              | <i>Gorilla gorilla</i>                | Boreoeutheria | CABD02405307.1  |              |
|              | <i>Heterocephalus glaber</i>          | Boreoeutheria | AHKG01071915.1  |              |
|              | <i>Homo sapiens</i>                   | Boreoeutheria | NP_065820.1     | X (Xq23)     |
|              | <i>Ictidomys tridecemlineatus</i>     | Boreoeutheria | AGTP01029649.1  |              |
|              | <i>Loxodonta africana</i>             | Afrotheria    | AAGU03056054.1  |              |
|              | <i>Macaca mulatta</i>                 | Boreoeutheria | NP_001177804.1  |              |
|              | <i>Mus musculus</i>                   | Boreoeutheria | NP_001035524.1  |              |
|              | <i>Mustela putorius furo</i>          | Boreoeutheria | AGTQ01035711.1  |              |
|              | <i>Myotis lucifugus</i>               | Boreoeutheria | AAPE02002754.1  |              |
|              | <i>Nomascus leucogenys</i>            | Boreoeutheria | ADSV01008253.1  |              |
|              | <i>Ochotona princeps</i>              | Boreoeutheria | AAVZ01396442.1  |              |
|              | <i>Oryctolagus cuniculus</i>          | Boreoeutheria | AAGW02041334.1  |              |
|              | <i>Otolemur garnettii</i>             | Boreoeutheria | AAQR03155329.1  |              |
|              | <i>Pan troglodytes</i>                | Boreoeutheria | AACZ03136290.1  |              |
|              | <i>Pongo abelii</i>                   | Boreoeutheria | ABGA01005524.1  |              |
|              | <i>Pteropus vampyrus</i>              | Boreoeutheria | ABRP01260471.1  |              |
|              | <i>Rattus norvegicus</i>              | Boreoeutheria | AAHX01113452.1  |              |
|              | <i>Tarsius syrichta</i>               | Boreoeutheria | ABRT010081689.1 |              |
|              | <i>Trichechus manatus latirostris</i> | Afrotheria    | AHIN01071955.1  |              |
|              | <i>Tupaia belangeri</i>               | Boreoeutheria | AAPY01382729.1  |              |
| <b>RTL1</b>  | <i>Bos taurus</i>                     | Boreoeutheria | NP_001181949    |              |
|              | <i>Callithrix jacchus</i>             | Boreoeutheria | ACFV01132248.1  |              |
|              | <i>Canis lupus familiaris</i>         | Boreoeutheria | AAEX03006004    |              |
|              | <i>Cavia porcellus</i>                | Boreoeutheria | AAKN02051948.1  |              |
|              | <i>Choloepus hoffmanni</i>            | Xenarthra     | ABVD01521323.1  |              |
|              | <i>Dasybus novemcinctus</i>           | Xenarthra     | AAGV03256735.1  |              |
|              | <i>Daubentonia madagascariensis</i>   | Boreoeutheria | AGTM011756538.1 |              |
|              | <i>Dipodomys ordii</i>                | Boreoeutheria | ABRO01195543.1  |              |
|              | <i>Equus caballus</i>                 | Boreoeutheria | AAWR02020062.1  |              |
|              | <i>Felis catus</i>                    | Boreoeutheria | AANG02058241.1  |              |
|              | <i>Gorilla gorilla</i>                | Boreoeutheria | CABD02116350.1  |              |
|              | <i>Heterocephalus glaber</i>          | Boreoeutheria | EHB11169.1      |              |
|              | <i>Homo sapiens</i>                   | Boreoeutheria | AAI50618        | 14 (14q32.2) |
|              | <i>Ictidomys tridecemlineatus</i>     | Boreoeutheria | AGTP01074072.1  |              |
|              | <i>Loxodonta africana</i>             | Afrotheria    | AAGU03025978    |              |
|              | <i>Macaca mulatta</i>                 | Boreoeutheria | XP_001110319    |              |
|              | <i>Microcebus murinus</i>             | Boreoeutheria | ABDC01565557.1  |              |
|              | <i>Mus musculus</i>                   | Boreoeutheria | NP_908998       |              |
|              | <i>Mustela putorius furo</i>          | Boreoeutheria | AEYP01037657.1  |              |
|              | <i>Myotis lucifugus</i>               | Boreoeutheria | AAPE02047295.1  |              |
|              | <i>Nomascus leucogenys</i>            | Boreoeutheria | ADSV01092893.1  |              |

|                |                                       |               |                    |            |
|----------------|---------------------------------------|---------------|--------------------|------------|
|                | <i>Ochotona princeps</i>              | Boreoeutheria | AAYZ01391477       |            |
|                | <i>Oryctolagus cuniculus</i>          | Boreoeutheria | AAGW02077263.1     |            |
|                | <i>Otolemur garnettii</i>             | Boreoeutheria | AAQR03046506.1     |            |
|                | <i>Pan troglodytes</i>                | Boreoeutheria | AADA01312366.1     |            |
|                | <i>Pongo abelii</i>                   | Boreoeutheria | ABGA01039457.1     |            |
|                | <i>Procapra capensis</i>              | Afrotheria    | ABRQ01643018       |            |
|                | <i>Pteropus vampyrus</i>              | Boreoeutheria | ABRP01223356.1     |            |
|                | <i>Trichechus manatus latirostris</i> | Afrotheria    | AHIN01054610.1     |            |
|                | <i>Tursiops truncatus</i>             | Boreoeutheria | ABRN02353414.1     |            |
| <b>ZCCHC16</b> | <i>Callithrix jacchus</i>             | Boreoeutheria | ACFV01055746.1     |            |
|                | <i>Canis lupus familiaris</i>         | Boreoeutheria | XP_549194          |            |
|                | <i>Choloepus hoffmanni</i>            | Xenarthra     | ABVD01449713.1 *   |            |
|                | <i>Daubentonia madagascariensis</i>   | Boreoeutheria | AGTM011637388.1    |            |
|                | <i>Echinops telfairi</i>              | Afrotheria    | AAIY01429107.1     |            |
|                | <i>Equus caballus</i>                 | Boreoeutheria | XP_001488764       |            |
|                | <i>Felis catus</i>                    | Boreoeutheria | AANG02074530.1     |            |
|                | <i>Gorilla gorilla</i>                | Boreoeutheria | CABD02405487.1     |            |
|                | <i>Homo sapiens</i>                   | Boreoeutheria | NP_001004308       | X (Xq23)   |
|                | <i>Ictidomys tridecemlineatus</i>     | Boreoeutheria | AAQQ01371003.1     |            |
|                | <i>Loxodonta africana</i>             | Afrotheria    | AAGU03055959.1     |            |
|                | <i>Macaca mulatta</i>                 | Boreoeutheria | NP_001181102       |            |
|                | <i>Mus musculus</i>                   | Boreoeutheria | NP_001028967       |            |
|                | <i>Mustela putorius furo</i>          | Boreoeutheria | AEYP01071779.1     |            |
|                | <i>Myotis lucifugus</i>               | Boreoeutheria | AAPE02002693       |            |
|                | <i>Nomascus leucogenys</i>            | Boreoeutheria | ADFV01008333.1     |            |
|                | <i>Oryctolagus cuniculus</i>          | Boreoeutheria | XP_002720260       |            |
|                | <i>Otolemur garnettii</i>             | Boreoeutheria | AAQR03170339.1     |            |
|                | <i>Pan troglodytes</i>                | Boreoeutheria | AADA01038094.1     |            |
|                | <i>Procapra capensis</i>              | Afrotheria    | ABRQ01131885.1     |            |
|                | <i>Trichechus manatus latirostris</i> | Afrotheria    | AHIN01072081.1     |            |
| <b>ZCCHC5</b>  | <i>Equus caballus</i>                 | Boreoeutheria | XP_003365869.1     |            |
|                | <i>Gorilla gorilla</i>                | Boreoeutheria | CABD02401497.1     |            |
|                | <i>Homo sapiens</i>                   | Boreoeutheria | AAI36549           | X (Xq21.1) |
|                | <i>Ictidomys tridecemlineatus</i>     | Boreoeutheria | AGTP01054468.1     |            |
|                | <i>Macaca mulatta</i>                 | Boreoeutheria | AANU01174818.1     |            |
|                | <i>Mus musculus</i>                   | Boreoeutheria | NP_955762          |            |
|                | <i>Myotis lucifugus</i>               | Boreoeutheria | AAPE02003884.1     |            |
|                | <i>Nomascus leucogenys</i>            | Boreoeutheria | ADFV01047424.1     |            |
|                | <i>Oryctolagus cuniculus</i>          | Boreoeutheria | AAGW02041680.1     |            |
|                | <i>Pan troglodytes</i>                | Boreoeutheria | AADA01082408.1     |            |
|                | <i>Pongo abelii</i>                   | Boreoeutheria | ABGA01280131.1     |            |
|                | <i>Pteropus vampyrus</i>              | Boreoeutheria | ENSPVAP00000003872 |            |
|                | <i>Pteropus vampyrus</i>              | Boreoeutheria | ABRP01216211.1     |            |
|                | <i>Trichechus manatus latirostris</i> | Afrotheria    | AHIN01066567.1 *   |            |
|                | <i>Tupaia belangeri</i>               | Boreoeutheria | AAPY01750949       |            |
|                | <i>Tursiops truncatus</i>             | Boreoeutheria | ABRN02156766.1     |            |
| <b>LDOC1</b>   | <i>Bos taurus</i>                     | Boreoeutheria | NP_001075013.1     |            |
|                | <i>Callithrix jacchus</i>             | Boreoeutheria | ACFV01165274.1     |            |
|                | <i>Canis lupus familiaris</i>         | Boreoeutheria | AAEX03026983.1     |            |
|                | <i>Cavia porcellus</i>                | Boreoeutheria | XP_003464753.1     |            |
|                | <i>Dasyurus novemcinctus</i>          | Xenarthra     | AAGV03124563.1     |            |
|                | <i>Dipodomys ordii</i>                | Boreoeutheria | ABRO01183309.1     |            |
|                | <i>Echinops telfairi</i>              | Afrotheria    | AAIY01054437       |            |
|                | <i>Equus caballus</i>                 | Boreoeutheria | AAWR02041332.1     |            |
|                | <i>Erinaceus europaeus</i>            | Boreoeutheria | AANN01096519.1     |            |
|                | <i>Felis catus</i>                    | Boreoeutheria | AANG02125169.1     |            |
|                | <i>Gorilla gorilla</i>                | Boreoeutheria | CABD02409225.1     |            |
|                | <i>Heterocephalus glaber</i>          | Boreoeutheria | AHKG01074095.1     |            |
|                | <i>Homo sapiens</i>                   | Boreoeutheria | NP_036449.1        | X (Xq27)   |

|               |                                       |               |                 |               |
|---------------|---------------------------------------|---------------|-----------------|---------------|
|               | <i>Ictidomys tridecemlineatus</i>     | Boreoeutheria | AGTP01037783.1  |               |
|               | <i>Macaca mulatta</i>                 | Boreoeutheria | XP_001085397.1  |               |
|               | <i>Mus musculus</i>                   | Boreoeutheria | NP_001018097.1  |               |
|               | <i>Mustela putorius furo</i>          | Boreoeutheria | AEYP01102792.1  |               |
|               | <i>Myotis lucifugus</i>               | Boreoeutheria | AAPE02042786.1  |               |
|               | <i>Nomascus leucogenys</i>            | Boreoeutheria | ADVF01118802.1  |               |
|               | <i>Ochotona princeps</i>              | Boreoeutheria | AAYZ01654760.1  |               |
|               | <i>Oryctolagus cuniculus</i>          | Boreoeutheria | AAGW02055714.1  |               |
|               | <i>Otolemur garnettii</i>             | Boreoeutheria | AAQR03136356.1  |               |
|               | <i>Pan troglodytes</i>                | Boreoeutheria | AACZ03140206.1  |               |
|               | <i>Pteropus vampyrus</i>              | Boreoeutheria | ABRP01249445    |               |
|               | <i>Trichechus manatus latirostris</i> | Afrotheria    | AHIN01080024.1  |               |
|               | <i>Tupaia belangeri</i>               | Boreoeutheria | AAPY01387257.1  |               |
|               | <i>Tursiops truncatus</i>             | Boreoeutheria | ABRN02225857.1  |               |
| <b>LDOC1L</b> |                                       |               |                 |               |
|               | <i>Bos taurus</i>                     | Boreoeutheria | XP_001253890.1  |               |
|               | <i>Callithrix jacchus</i>             | Boreoeutheria | ACFV01163893.1  |               |
|               | <i>Canis lupus familiaris</i>         | Boreoeutheria | XP_538334.1     |               |
|               | <i>Cavia porcellus</i>                | Boreoeutheria | AAKN02056344    |               |
|               | <i>Dasypus novemcinctus</i>           | Xenarthra     | AAGV03215739.1  |               |
|               | <i>Equus caballus</i>                 | Boreoeutheria | AAWR02040740.1  |               |
|               | <i>Felis catus</i>                    | Boreoeutheria | AANG02167187.1  |               |
|               | <i>Heterocephalus glaber</i>          | Boreoeutheria | AHKG01032576.1  |               |
|               | <i>Homo sapiens</i>                   | Boreoeutheria | NP_115663.2     | 22 (22q13.31) |
|               | <i>Ictidomys tridecemlineatus</i>     | Boreoeutheria | AGTP01098895.1  |               |
|               | <i>Loxodonta africana</i>             | Afrotheria    | AAGU03077096.1  |               |
|               | <i>Macaca mulatta</i>                 | Boreoeutheria | NP_001181372.1  |               |
|               | <i>Mus musculus</i>                   | Boreoeutheria | NP_808298.2     |               |
|               | <i>Mustela putorius furo</i>          | Boreoeutheria | AGTQ01046253.1  |               |
|               | <i>Myotis lucifugus</i>               | Boreoeutheria | AAPE02062099    |               |
|               | <i>Myotis lucifugus</i>               | Boreoeutheria | AAPE02062099.1  |               |
|               | <i>Nomascus leucogenys</i>            | Boreoeutheria | ADVF01132078.1  |               |
|               | <i>Otolemur garnettii</i>             | Boreoeutheria | AAQR03015785.1  |               |
|               | <i>Ovis aries</i>                     | Boreoeutheria | ACIV010481667.1 |               |
|               | <i>Pan troglodytes</i>                | Boreoeutheria | AADA01102719.1  |               |
|               | <i>Pongo abelii</i>                   | Boreoeutheria | ABGA01382764.1  |               |
|               | <i>Procavia capensis</i>              | Afrotheria    | ABRQ01229456.1  |               |
|               | <i>Pteropus vampyrus</i>              | Boreoeutheria | ABRP01299088.1  |               |
|               | <i>Rattus norvegicus</i>              | Boreoeutheria | AAHX01051963.1  |               |
|               | <i>Tarsius syrichta</i>               | Boreoeutheria | ABRT010780528.1 |               |
|               | <i>Trichechus manatus latirostris</i> | Afrotheria    | AHIN01072820.1  |               |
|               | <i>Tupaia belangeri</i>               | Boreoeutheria | AAPY01023583.1  |               |
|               | <i>Tursiops truncatus</i>             | Boreoeutheria | ABRN02316718.1  |               |
| <b>FAM127</b> |                                       |               |                 |               |
|               | <i>Bos taurus</i>                     | Boreoeutheria | NP_001068990    |               |
|               | <i>Callithrix jacchus</i>             | Boreoeutheria | ACFV01112550.1  |               |
|               | <i>Canis lupus familiaris</i>         | Boreoeutheria | XP_003435578    |               |
|               | <i>Dasypus novemcinctus</i>           | Xenarthra     | AAGV03237809.1  |               |
|               | <i>Dipodomys ordii</i>                | Boreoeutheria | ABRO01163821.1  |               |
|               | <i>Echinops telfairi</i>              | Afrotheria    | AAIY01063307.1  |               |
|               | <i>Equus caballus</i>                 | Boreoeutheria | AAWR02034063.1  |               |
|               | <i>Erinaceus europaeus</i>            | Boreoeutheria | AANN01497583.1  |               |
|               | <i>Gorilla gorilla</i>                | Boreoeutheria | CABD02408507.1  |               |
|               | <i>Heterocephalus glaber</i>          | Boreoeutheria | AFSB01136187.1  |               |
|               | <i>Homo sapiens</i>                   | Boreoeutheria | NP_001071639.1  | X (Xq26)      |
|               | <i>Ictidomys tridecemlineatus</i>     | Boreoeutheria | AGTP01094767.1  |               |
|               | <i>Loxodonta africana</i>             | Afrotheria    | AAGU03084152.1  |               |
|               | <i>Macaca mulatta</i>                 | Boreoeutheria | NP_001181065    |               |
|               | <i>Microcebus murinus</i>             | Boreoeutheria | ABDC01334399.1  |               |
|               | <i>Mus musculus</i>                   | Boreoeutheria | AAHY01743160.1  |               |
|               | <i>Mustela putorius furo</i>          | Boreoeutheria | AGTQ01047722.1  |               |
|               | <i>Myotis lucifugus</i>               | Boreoeutheria | AAPE02002176.1  |               |

|                 |                                       |               |                      |               |
|-----------------|---------------------------------------|---------------|----------------------|---------------|
|                 | <i>Nomascus leucogenys</i>            | Boreoeutheria | ADVV01072099.1       |               |
|                 | <i>Ochotona princeps</i>              | Boreoeutheria | AAVZ01491877         |               |
|                 | <i>Oryctolagus cuniculus</i>          | Boreoeutheria | AAGW02046818.1       |               |
|                 | <i>Otolemur garnettii</i>             | Boreoeutheria | AAQR03189099         |               |
|                 | <i>Otolemur garnettii</i>             | Boreoeutheria | AAQR03189099.1       |               |
|                 | <i>Pan troglodytes</i>                | Boreoeutheria | AADA01342505.1       |               |
|                 | <i>Pongo abelii</i>                   | Boreoeutheria | ABGA01295535.1       |               |
|                 | <i>Procavia capensis</i>              | Afrotheria    | ABRQ01574575.1       |               |
|                 | <i>Pteropus vampyrus</i>              | Boreoeutheria | ABRP01194706.1       |               |
|                 | <i>Tarsius syrichta</i>               | Boreoeutheria | ABRT011084406.1      |               |
|                 | <i>Tursiops truncatus</i>             | Boreoeutheria | ABRN02215744.1       |               |
|                 | <i>Vicugna pacos</i>                  | Boreoeutheria | ABRR01323960.1       |               |
| <b>SIRH12</b>   |                                       |               |                      |               |
|                 | <i>Macropus eugenii</i>               | Marsupialia   | ABQO020446584.1      |               |
| <b>C22orf29</b> |                                       |               |                      |               |
|                 | <i>Callithrix jacchus</i>             | Boreoeutheria | XP_002743589.1       |               |
|                 | <i>Dipodomys ordii</i>                | Boreoeutheria | ABRO01388190.1       |               |
|                 | <i>Echinops telfairi</i>              | Afrotheria    | ENSETET00000016288 * |               |
|                 | <i>Homo sapiens</i>                   | Boreoeutheria | NP_078903.3          | 22 (22q11.21) |
|                 | <i>Ictidomys tridecemlineatus</i>     | Boreoeutheria | AGTP01078122.1       |               |
|                 | <i>Loxodonta africana</i>             | Afrotheria    | AAGU03075386.1 *     |               |
|                 | <i>Macaca mulatta</i>                 | Boreoeutheria | AFE75991.1           |               |
|                 | <i>Nomascus leucogenys</i>            | Boreoeutheria | XP_003280408.1       |               |
|                 | <i>Oryctolagus cuniculus</i>          | Boreoeutheria | AAGW02072302.1       |               |
|                 | <i>Pan troglodytes</i>                | Boreoeutheria | NP_001230896.1       |               |
|                 | <i>Pongo abelii</i>                   | Boreoeutheria | XP_002830899.1       |               |
|                 | <i>Trichechus manatus latirostris</i> | Afrotheria    | AHIN01144892.1 *     |               |

| Gene  | Organism                              | Taxonomic group | Protein/nucleotide accession number | Chromosome (location) |
|-------|---------------------------------------|-----------------|-------------------------------------|-----------------------|
| PNMA1 | <i>Ailuropoda melanoleuca</i>         | Boreoeutheria   | XP_002914729                        |                       |
|       | <i>Bos taurus</i>                     | Boreoeutheria   | NP_001098461                        |                       |
|       | <i>Callithrix jacchus</i>             | Boreoeutheria   | XP_002754140                        |                       |
|       | <i>Canis lupus familiaris</i>         | Boreoeutheria   | XP_547896                           |                       |
|       | <i>Cavia porcellus</i>                | Boreoeutheria   | XP_003472455.1                      |                       |
|       | <i>Choloepus hoffmanni</i>            | Xenarthra       | ABVD01858941                        |                       |
|       | <i>Cricetulus griseus</i>             | Boreoeutheria   | XP_003505180.1                      |                       |
|       | <i>Dasyopus novemcinctus</i>          | Xenarthra       | AAGV03070378.1                      |                       |
|       | <i>Echinops telfairi</i>              | Afrotheria      | AAIY01462143.1                      |                       |
|       | <i>Equus caballus</i>                 | Boreoeutheria   | XP_001490004                        |                       |
|       | <i>Felis catus</i>                    | Boreoeutheria   | ACBE01211376                        |                       |
|       | <i>Gorilla gorilla</i>                | Boreoeutheria   | CABD02112671                        |                       |
|       | <i>Heterocephalus glaber</i>          | Boreoeutheria   | AFSB01202249.1                      |                       |
|       | <i>Homo sapiens</i>                   | Boreoeutheria   | NP_006020                           | 14 (14q24.3)          |
|       | <i>Ictidomys tridecemlineatus</i>     | Boreoeutheria   | AGTP01020471.1                      |                       |
|       | <i>Loxodonta africana</i>             | Afrotheria      | XP_003408802.1                      |                       |
|       | <i>Macaca mulatta</i>                 | Boreoeutheria   | XP_001091302                        |                       |
|       | <i>Mus musculus</i>                   | Boreoeutheria   | NP_081714                           |                       |
|       | <i>Mustela putorius furo</i>          | Boreoeutheria   | AGTQ01032725                        |                       |
|       | <i>Myotis lucifugus</i>               | Boreoeutheria   | AAPE02034650                        |                       |
|       | <i>Nomascus leucogenys</i>            | Boreoeutheria   | XR_121367.1                         |                       |
|       | <i>Oryctolagus cuniculus</i>          | Boreoeutheria   | XP_002719706.1                      |                       |
|       | <i>Otolemur garnettii</i>             | Boreoeutheria   | AAQR03045035                        |                       |
|       | <i>Pan troglodytes</i>                | Boreoeutheria   | XP_001141691                        |                       |
|       | <i>Pongo abelii</i>                   | Boreoeutheria   | XP_002824970                        |                       |
|       | <i>Pteropus vampyrus</i>              | Boreoeutheria   | ABRP01196995                        |                       |
|       | <i>Rattus norvegicus</i>              | Boreoeutheria   | NP_570833                           |                       |
|       | <i>Sorex araneus</i>                  | Boreoeutheria   | AALT01503131                        |                       |
|       | <i>Sus scrofa</i>                     | Boreoeutheria   | XP_001928996                        |                       |
|       | <i>Tarsius syrichta</i>               | Boreoeutheria   | ABRT010588175                       |                       |
|       | <i>Trichechus manatus latirostris</i> | Afrotheria      | AHIN01016586.1                      |                       |
|       | <i>Tupaia belangeri</i>               | Boreoeutheria   | AAPY01355955                        |                       |
|       | <i>Tursiops truncatus</i>             | Boreoeutheria   | ABRN01411963                        |                       |
| PNMA2 | <i>Ailuropoda melanoleuca</i>         | Boreoeutheria   | ACTA01184811.1                      |                       |
|       | <i>Bos taurus</i>                     | Boreoeutheria   | NP_001039938                        |                       |
|       | <i>Callithrix jacchus</i>             | Boreoeutheria   | XP_002756910.1                      |                       |
|       | <i>Canis lupus familiaris</i>         | Boreoeutheria   | XP_543234                           |                       |
|       | <i>Choloepus hoffmanni</i>            | Xenarthra       | ABVD01322223.1 *                    |                       |
|       | <i>Cricetulus griseus</i>             | Boreoeutheria   | XP_003505211.1                      |                       |
|       | <i>Dasyopus novemcinctus</i>          | Xenarthra       | AAGV03058646.1                      |                       |
|       | <i>Daubentonia madagascariensis</i>   | Boreoeutheria   | AGTM010363728.1                     |                       |
|       | <i>Echinops telfairi</i>              | Afrotheria      | AAIY01539302                        |                       |
|       | <i>Equus caballus</i>                 | Boreoeutheria   | XP_001494457.1                      |                       |
|       | <i>Felis catus</i>                    | Boreoeutheria   | ACBE01547290.1                      |                       |
|       | <i>Gorilla gorilla</i>                | Boreoeutheria   | CABD02358444.1                      |                       |
|       | <i>Heterocephalus glaber</i>          | Boreoeutheria   | AFSB01189534                        |                       |
|       | <i>Homo sapiens</i>                   | Boreoeutheria   | NP_009188                           | 8 (8p21.2)            |
|       | <i>Ictidomys tridecemlineatus</i>     | Boreoeutheria   | AGTP01103703.1                      |                       |
|       | <i>Loxodonta africana</i>             | Afrotheria      | AAGU03044807                        |                       |
|       | <i>Macaca mulatta</i>                 | Boreoeutheria   | XP_001108453.1                      |                       |
|       | <i>Microcebus murinus</i>             | Boreoeutheria   | ABDC01025881                        |                       |
|       | <i>Mus musculus</i>                   | Boreoeutheria   | NP_780707                           |                       |
|       | <i>Mustela putorius furo</i>          | Boreoeutheria   | AEYP01085655                        |                       |
|       | <i>Myotis lucifugus</i>               | Boreoeutheria   | AAPE02029833.1                      |                       |

|              |                                       |               |                  |            |
|--------------|---------------------------------------|---------------|------------------|------------|
|              | <i>Nomascus leucogenys</i>            | Boreoeutheria | XP_003272943.1   |            |
|              | <i>Oryctolagus cuniculus</i>          | Boreoeutheria | XP_002709354.1   |            |
|              | <i>Otolemur garnettii</i>             | Boreoeutheria | AAQR03106253.1   |            |
|              | <i>Pan troglodytes</i>                | Boreoeutheria | XP_528094        |            |
|              | <i>Pongo abelii</i>                   | Boreoeutheria | NP_001127009     |            |
|              | <i>Procapra capensis</i>              | Afrotheria    | ABRQ01301107.1   |            |
|              | <i>Rattus norvegicus</i>              | Boreoeutheria | NP_001100742     |            |
|              | <i>Sorex araneus</i>                  | Boreoeutheria | AALT01151904     |            |
|              | <i>Sus scrofa</i>                     | Boreoeutheria | XP_001925541.2   |            |
|              | <i>Tarsius syrichta</i>               | Boreoeutheria | ABRT010502723.1  |            |
|              | <i>Trichechus manatus latirostris</i> | Afrotheria    | AHIN01086405     |            |
|              | <i>Tupaia belangeri</i>               | Boreoeutheria | AAPY01194613.1   |            |
|              | <i>Tursiops truncatus</i>             | Boreoeutheria | ABRN02419377.1   |            |
| <b>MOAPI</b> |                                       |               |                  |            |
|              | <i>Callithrix jacchus</i>             | Boreoeutheria | XP_002754262.1   |            |
|              | <i>Cricetulus griseus</i>             | Boreoeutheria | XP_003506983.1   |            |
|              | <i>Dasyurus novemcinctus</i>          | Xenarthra     | AAGV03218223.1 * |            |
|              | <i>Daubentonina madagascariensis</i>  | Boreoeutheria | AGTM011692791.1  |            |
|              | <i>Felis catus</i>                    | Boreoeutheria | ACBE01574473     |            |
|              | <i>Gorilla gorilla</i>                | Boreoeutheria | CABD02115479.1   |            |
|              | <i>Homo sapiens</i>                   | Boreoeutheria | NP_071434        | 14 (14q32) |
|              | <i>Ictidomys tridecemlineatus</i>     | Boreoeutheria | AAQQ01349199.1   |            |
|              | <i>Loxodonta africana</i>             | Afrotheria    | XP_003408887.1   |            |
|              | <i>Macaca mulatta</i>                 | Boreoeutheria | XP_001089203     |            |
|              | <i>Mus musculus</i>                   | Boreoeutheria | NP_001136409     |            |
|              | <i>Mustela putorius furo</i>          | Boreoeutheria | AEYP01037879.1   |            |
|              | <i>Nomascus leucogenys</i>            | Boreoeutheria | XP_003260955.1   |            |
|              | <i>Otolemur garnettii</i>             | Boreoeutheria | AAQR03046215     |            |
|              | <i>Pan troglodytes</i>                | Boreoeutheria | XP_510137        |            |
|              | <i>Pongo abelii</i>                   | Boreoeutheria | XP_002825093.1   |            |
|              | <i>Procapra capensis</i>              | Afrotheria    | ABRQ01189423.1   |            |
|              | <i>Rattus norvegicus</i>              | Boreoeutheria | NP_001013119     |            |
|              | <i>Spermophilus tridecemlineatus</i>  | Boreoeutheria | AAQQ01349199     |            |
|              | <i>Trichechus manatus latirostris</i> | Afrotheria    | AHIN01054316.1   |            |
| <b>PNMA3</b> |                                       |               |                  |            |
|              | <i>Callithrix jacchus</i>             | Boreoeutheria | XP_002763430.1   |            |
|              | <i>Dasyurus novemcinctus</i>          | Xenarthra     | AAGV03164000.1   |            |
|              | <i>Equus caballus</i>                 | Boreoeutheria | XP_001496576.1   |            |
|              | <i>Felis catus</i>                    | Boreoeutheria | AANG01462554     |            |
|              | <i>Homo sapiens</i>                   | Boreoeutheria | NP_037496        | X (Xq28)   |
|              | <i>Ictidomys tridecemlineatus</i>     | Boreoeutheria | AGTP01098202.1   |            |
|              | <i>Loxodonta africana</i>             | Afrotheria    | AAGU03085805.1   |            |
|              | <i>Macaca mulatta</i>                 | Boreoeutheria | XP_001083094     |            |
|              | <i>Mus musculus</i>                   | Boreoeutheria | NP_694809        |            |
|              | <i>Mustela putorius furo</i>          | Boreoeutheria | AGTQ01072216.1   |            |
|              | <i>Myotis lucifugus</i>               | Boreoeutheria | AAPE02015504     |            |
|              | <i>Nomascus leucogenys</i>            | Boreoeutheria | XP_003271923.1   |            |
|              | <i>Pan troglodytes</i>                | Boreoeutheria | XP_001145572.1   |            |
|              | <i>Pongo abelii</i>                   | Boreoeutheria | XP_002832318.1   |            |
|              | <i>Pteropus vampyrus</i>              | Boreoeutheria | ABRP01300743.1   |            |
|              | <i>Rattus norvegicus</i>              | Boreoeutheria | NP_001099812     |            |
| <b>PNMA5</b> |                                       |               |                  |            |
|              | <i>Callithrix jacchus</i>             | Boreoeutheria | XP_002763433.1   |            |
|              | <i>Cavia porcellus</i>                | Boreoeutheria | AAKN02056074     |            |
|              | <i>Dasyurus novemcinctus</i>          | Xenarthra     | AAGV03164006.1   |            |
|              | <i>Dipodomys ordii</i>                | Boreoeutheria | ABRO01400221.1   |            |
|              | <i>Equus caballus</i>                 | Boreoeutheria | XP_003365951.1   |            |
|              | <i>Gorilla gorilla</i>                | Boreoeutheria | CABD02410430.1   |            |
|              | <i>Homo sapiens</i>                   | Boreoeutheria | NP_001096620     | X (Xq28)   |
|              | <i>Ictidomys tridecemlineatus</i>     | Boreoeutheria | AGTP01098209.1   |            |

|                |                                       |               |                    |          |
|----------------|---------------------------------------|---------------|--------------------|----------|
|                | <i>Loxodonta africana</i>             | Afrotheria    | XP_003421289.1     |          |
|                | <i>Macaca mulatta</i>                 | Boreoeutheria | XP_001082427.1     |          |
|                | <i>Microcebus murinus</i>             | Boreoeutheria | ABDC01277479       |          |
|                | <i>Mus musculus</i>                   | Boreoeutheria | NP_001093931       |          |
|                | <i>Myotis lucifugus</i>               | Boreoeutheria | AAPE02015506.1     |          |
|                | <i>Nomascus leucogenys</i>            | Boreoeutheria | XP_003271921.1     |          |
|                | <i>Otolemur garnettii</i>             | Boreoeutheria | AAQR03167750       |          |
|                | <i>Pteropus vampyrus</i>              | Boreoeutheria | ABRP01159492       |          |
|                | <i>Rattus norvegicus</i>              | Boreoeutheria | NP_001101049       |          |
|                | <i>Trichechus manatus latirostris</i> | Afrotheria    | AHIN01144502.1     |          |
|                | <i>Tupaia belangeri</i>               | Boreoeutheria | AAPY01451866.1     |          |
|                | <i>Tursiops truncatus</i>             | Boreoeutheria | ABRN02551903.1     |          |
|                | <i>Vicugna pacos</i>                  | Boreoeutheria | ABRR01273839.1     |          |
| <b>PNMA6</b>   |                                       |               |                    |          |
|                | <i>Ailuropoda melanoleuca</i>         | Boreoeutheria | XP_002930132.1     |          |
|                | <i>Canis lupus familiaris</i>         | Boreoeutheria | XP_549350          |          |
|                | <i>Canis lupus familiaris</i>         | Boreoeutheria | AAEX03027066.1     |          |
|                | <i>Dasybus novemcinctus</i>           | Xenarthra     | AAGV03164002.1     |          |
|                | <i>Dipodomys ordii</i>                | Boreoeutheria | ABRO01263040       |          |
|                | <i>Dipodomys ordii</i>                | Boreoeutheria | ABRO01263040.1     |          |
|                | <i>Echinops telfairi</i>              | Afrotheria    | AAIY01541208.1     |          |
|                | <i>Equus caballus</i>                 | Boreoeutheria | ENSECAT00000014076 |          |
|                | <i>Felis catus</i>                    | Boreoeutheria | ACBE01511238       |          |
|                | <i>Homo sapiens</i>                   | Boreoeutheria | NP_116271          | X (Xq28) |
|                | <i>Ictidomys tridecemlineatus</i>     | Boreoeutheria | AGTP01098201.1     |          |
|                | <i>Mustela putorius furo</i>          | Boreoeutheria | AEYP01114530.1     |          |
|                | <i>Myotis lucifugus</i>               | Boreoeutheria | AAPE02015504.1     |          |
|                | <i>Otolemur garnettii</i>             | Boreoeutheria | AAQR03194462.1     |          |
|                | <i>Pongo abelii</i>                   | Boreoeutheria | ABGA01401781.1     |          |
|                | <i>Pteropus vampyrus</i>              | Boreoeutheria | ABRP01291682       |          |
|                | <i>Trichechus manatus latirostris</i> | Afrotheria    | AHIN01144511.1     |          |
|                | <i>Tursiops truncatus</i>             | Boreoeutheria | ENSTTRP00000001277 |          |
| <b>ZCCHC12</b> |                                       |               |                    |          |
|                | <i>Ailuropoda melanoleuca</i>         | Boreoeutheria | XP_002916128.1     |          |
|                | <i>Bos taurus</i>                     | Boreoeutheria | NP_001069665       |          |
|                | <i>Canis lupus familiaris</i>         | Boreoeutheria | XP_549212          |          |
|                | <i>Cavia porcellus</i>                | Boreoeutheria | XP_003467642.1     |          |
|                | <i>Cricetulus griseus</i>             | Boreoeutheria | AFTD01039914.1     |          |
|                | <i>Dasybus novemcinctus</i>           | Xenarthra     | AAGV03098506.1     |          |
|                | <i>Dipodomys ordii</i>                | Boreoeutheria | ABRO01263293.1     |          |
|                | <i>Equus caballus</i>                 | Boreoeutheria | XP_001487947       |          |
|                | <i>Erinaceus europaeus</i>            | Boreoeutheria | AANN01151507       |          |
|                | <i>Felis catus</i>                    | Boreoeutheria | ACBE01504543.1     |          |
|                | <i>Gorilla gorilla</i>                | Boreoeutheria | CABD02404599.1     |          |
|                | <i>Homo sapiens</i>                   | Boreoeutheria | NP_776159          | X (Xq24) |
|                | <i>Ictidomys tridecemlineatus</i>     | Boreoeutheria | AAQQ01371946.1     |          |
|                | <i>Macaca mulatta</i>                 | Boreoeutheria | XP_001099794       |          |
|                | <i>Microcebus murinus</i>             | Boreoeutheria | ABDC01181532       |          |
|                | <i>Mus musculus</i>                   | Boreoeutheria | NP_082601          |          |
|                | <i>Mustela putorius furo</i>          | Boreoeutheria | AGTQ01053520.1     |          |
|                | <i>Nomascus leucogenys</i>            | Boreoeutheria | XP_003262290.1     |          |
|                | <i>Oryctolagus cuniculus</i>          | Boreoeutheria | XP_002720256.1     |          |
|                | <i>Ovis aries</i>                     | Boreoeutheria | ACIV012295118.1    |          |
|                | <i>Pan troglodytes</i>                | Boreoeutheria | XP_529128.3        |          |
|                | <i>Pongo abelii</i>                   | Boreoeutheria | XP_002832079       |          |
|                | <i>Pongo abelii</i>                   | Boreoeutheria | XP_002831991.1     |          |
|                | <i>Procavia capensis</i>              | Afrotheria    | ABRQ01217588       |          |
|                | <i>Pteropus vampyrus</i>              | Boreoeutheria | ABRP01045922.1     |          |
|                | <i>Rattus norvegicus</i>              | Boreoeutheria | NP_001014087       |          |
|                | <i>Spermophilus tridecemlineatus</i>  | Boreoeutheria | AAQQ01371946       |          |



|                |                                       |               |                 |               |
|----------------|---------------------------------------|---------------|-----------------|---------------|
|                | <i>Sus scrofa</i>                     | Boreoeutheria | XP_003135397.1  |               |
|                | <i>Trichechus manatus latirostris</i> | Afrotheria    | AHIN01072378.1  |               |
|                | <i>Tursiops truncatus</i>             | Boreoeutheria | ABRN02045262.1  |               |
|                | <i>Vicugna pacos</i>                  | Boreoeutheria | ABRR01371617.1  |               |
| <b>PNMAL1</b>  |                                       |               |                 |               |
|                | <i>Ailuropoda melanoleuca</i>         | Boreoeutheria | ACTA01042111.1  |               |
|                | <i>Bos taurus</i>                     | Boreoeutheria | NP_001095982    |               |
|                | <i>Callithrix jacchus</i>             | Boreoeutheria | ACFV01175909.1  |               |
|                | <i>Canis lupus familiaris</i>         | Boreoeutheria | AAEX03000861.1  |               |
|                | <i>Cavia porcellus</i>                | Boreoeutheria | XP_003464736.1  |               |
|                | <i>Dasybus novemcinctus</i>           | Xenarthra     | AAGV03076085.1  |               |
|                | <i>Dipodomys ordii</i>                | Boreoeutheria | ABRO01140072.1  |               |
|                | <i>Equus caballus</i>                 | Boreoeutheria | AAWR02030549.1  |               |
|                | <i>Gorilla gorilla</i>                | Boreoeutheria | CABD02181514.1  |               |
|                | <i>Heterocephalus glaber</i>          | Boreoeutheria | AFSB01041974.1  |               |
|                | <i>Homo sapiens</i>                   | Boreoeutheria | NP_060685       | 19 (19q13.32) |
|                | <i>Ictidomys tridecemlineatus</i>     | Boreoeutheria | AGTP01089491.1  |               |
|                | <i>Loxodonta africana</i>             | Afrotheria    | AAGU03011748.1  |               |
|                | <i>Macaca mulatt</i>                  | Boreoeutheria | AEHK01141396.1  |               |
|                | <i>Microcebus murinus</i>             | Boreoeutheria | ABDC01329145    |               |
|                | <i>Mus musculus</i>                   | Boreoeutheria | NP_001007570    |               |
|                | <i>Mustela putorius furo</i>          | Boreoeutheria | AEYP01068380.1  |               |
|                | <i>Myotis lucifugus</i>               | Boreoeutheria | AAPE02061731    |               |
|                | <i>Nomascus leucogenys</i>            | Boreoeutheria | ADSV01102146.1  |               |
|                | <i>Oryctolagus cuniculus</i>          | Boreoeutheria | AAGW02072742.1  |               |
|                | <i>Otolemur garnettii</i>             | Boreoeutheria | AAQR03153780.1  |               |
|                | <i>Pan troglodytes</i>                | Boreoeutheria | XP_524313       |               |
|                | <i>Pongo abelii</i>                   | Boreoeutheria | NP_001125341    |               |
|                | <i>Pteropus vampyrus</i>              | Boreoeutheria | ABRP01162274.1  |               |
|                | <i>Rattus norvegicus</i>              | Boreoeutheria | NP_001101943    |               |
|                | <i>Tarsius syrichta</i>               | Boreoeutheria | ABRT010554846.1 |               |
|                | <i>Trichechus manatus latirostris</i> | Afrotheria    | AHIN01084034.1  |               |
|                | <i>Tursiops truncatus</i>             | Boreoeutheria | ABRN02000473.1  |               |
| <b>PNMAL2</b>  |                                       |               |                 |               |
|                | <i>Callithrix jacchus</i>             | Boreoeutheria | ACFV01108478.1  |               |
|                | <i>Echinops telfairi</i>              | Afrotheria    | AAIY01565835.1  |               |
|                | <i>Homo sapiens</i>                   | Boreoeutheria | NP_065760       | 19 (19q13.32) |
|                | <i>Loxodonta africana</i>             | Afrotheria    | XP_003406745.1  |               |
|                | <i>Macaca mulatta</i>                 | Boreoeutheria | AANU01182480.1  |               |
|                | <i>Mus musculus</i>                   | Boreoeutheria | NP_001093106    |               |
|                | <i>Mustela putorius furo</i>          | Boreoeutheria | AEYP01068377.1  |               |
|                | <i>Nomascus leucogenys</i>            | Boreoeutheria | ADSV01102148.1  |               |
|                | <i>Otolemur garnettii</i>             | Boreoeutheria | AAQR03153784    |               |
|                | <i>Pan troglodytes</i>                | Boreoeutheria | XP_001167965    |               |
|                | <i>Pongo abelii</i>                   | Boreoeutheria | XP_002829490    |               |
|                | <i>Rattus norvegicus</i>              | Boreoeutheria | NP_001100951    |               |
|                | <i>Trichechus manatus latirostris</i> | Afrotheria    | AHIN01084034.1  |               |
| <b>ZCCHC18</b> |                                       |               |                 |               |
|                | <i>Cricetulus griseus</i>             | Boreoeutheria | AFTD01070222.1  |               |
|                | <i>Homo sapiens</i>                   | Boreoeutheria | NP_001137450    | X (Xq22.2)    |
|                | <i>Ictidomys tridecemlineatus</i>     | Boreoeutheria | AGTP01013369.1  |               |
|                | <i>Mus musculus</i>                   | Boreoeutheria | NP_001030586    |               |
|                | <i>Nomascus leucogenys</i>            | Boreoeutheria | ADSV01007938.1  |               |
|                | <i>Canis lupus familiaris</i>         | Boreoeutheria | XP_549160.3     |               |
|                | <i>Pan troglodytes</i>                | Boreoeutheria | XP_003317651.1  |               |
|                | <i>Rattus norvegicus</i>              | Boreoeutheria | AAHX01113221.1  |               |
|                | <i>Trichechus manatus latirostris</i> | Afrotheria    | AHIN01134087.1  |               |
| <b>CCDC8</b>   |                                       |               |                 |               |
|                | <i>Bos taurus</i>                     | Boreoeutheria | AAX31380.1      |               |
|                | <i>Canis lupus familiaris</i>         | Boreoeutheria | XP_003432615.1  |               |

|               |                              |               |                |               |
|---------------|------------------------------|---------------|----------------|---------------|
|               | <i>Cavia porcellus</i>       | Boreoeutheria | XP_003464735.1 |               |
|               | <i>Equus caballus</i>        | Boreoeutheria | XP_001502968.3 |               |
|               | <i>Homo sapiens</i>          | Boreoeutheria | NP_114429.2    | 19 (19q13.32) |
|               | <i>Loxodonta africana</i>    | Afrotheria    | AAGU03011749.1 |               |
|               | <i>Macaca mulatta</i>        | Boreoeutheria | XP_001111790.1 |               |
|               | <i>Mus musculus</i>          | Boreoeutheria | EDL42061.1     |               |
|               | <i>Pan troglodytes</i>       | Boreoeutheria | XP_001167818.1 |               |
|               | <i>Pongo abelii</i>          | Boreoeutheria | XP_002829489.1 |               |
| <b>M-PNMA</b> |                              |               |                |               |
|               | <i>Macropus eugenii</i>      | Marsupialia   | BAK55632.1     |               |
|               | <i>Monodelphis domestica</i> | Marsupialia   | AAFR03007941   | 3             |
|               | <i>Sarcophilus harrisii</i>  | Marsupialia   | AFEY01451898   |               |

---

| Gene                                  | Organism                                  | Taxonomic group       | Protein/nucleotide accession number | Chromosome (location) |
|---------------------------------------|-------------------------------------------|-----------------------|-------------------------------------|-----------------------|
| <b>GIN1</b>                           | <i>Ailuropoda melanoleuca</i>             | Boreoeutheria         | ACTA01147224.1                      |                       |
|                                       | <i>Anolis carolinensis</i>                | Sauropsida            | ENSACAP00000006979                  |                       |
|                                       | <i>Bos taurus</i>                         | Boreoeutheria         | DAA22293.1                          |                       |
|                                       | <i>Callithrix jacchus</i>                 | Boreoeutheria         | ACFV01006841.1                      |                       |
|                                       | <i>Canis lupus familiaris</i>             | Boreoeutheria         | XP_003639006.1                      |                       |
|                                       | <i>Choloepus hoffmanni</i>                | Xenarthra             | ABVD01699732.1                      |                       |
|                                       | <i>Chrysemys picta bellii</i>             | Sauropsida            | AHGY01271991.1                      |                       |
|                                       | <i>Dasybus novemcinctus</i>               | Xenarthra             | ENSDNOP00000015601                  |                       |
|                                       | <i>Daubentonia madagascariensis</i>       | Boreoeutheria         | AGTM011584885.1                     |                       |
|                                       | <i>Dipodomys ordii</i>                    | Boreoeutheria         | ENSDORP00000010277                  |                       |
|                                       | <i>Echinops telfairi</i>                  | Afrotheria            | AAIY01023878.1                      |                       |
|                                       | <i>Equus caballus</i>                     | Boreoeutheria         | ENSECAT00000022350                  |                       |
|                                       | <i>Felis catus</i>                        | Boreoeutheria         | ACBE01035028.1                      |                       |
|                                       | <i>Gallus gallus</i>                      | Sauropsida            | ENSGALT00000024621                  | Z                     |
|                                       | <i>Gorilla gorilla</i>                    | Boreoeutheria         | CABD02299754.1                      |                       |
|                                       | <i>Heterocephalus glaber</i>              | Boreoeutheria         | AFSB01096689.1                      |                       |
|                                       | <i>Homo sapiens</i>                       | Boreoeutheria         | NP_060146.2                         | 5 (5q21.1)            |
|                                       | <i>Ictidomys tridecemlineatus</i>         | Boreoeutheria         | AGTP01043191.1                      |                       |
|                                       | <i>Loxodonta africana</i>                 | Afrotheria            | XP_003405049.1                      |                       |
|                                       | <i>Macaca mulatta</i>                     | Boreoeutheria         | NP_001181013                        |                       |
|                                       | <i>Macropus eugenii</i>                   | Marsupialia           | ABQO020290995.1                     |                       |
|                                       | <i>Meleagris gallopavo</i>                | Sauropsida            | ADDD01043941.1                      |                       |
|                                       | <i>Melopsittacus undulatus budgerigar</i> | Sauropsida            | AGAI01041143.1                      |                       |
|                                       | <i>Microcebus murinus</i>                 | Boreoeutheria         | ABDC01264238.1                      |                       |
|                                       | <i>Monodelphis domestica</i>              | Marsupialia           | ENSMODT00000024502                  |                       |
|                                       | <i>Mus musculus</i>                       | Boreoeutheria         | NP_080526                           |                       |
|                                       | <i>Mustela putorius furo</i>              | Boreoeutheria         | AEYP01072838.1                      |                       |
|                                       | <i>Myotis lucifugus</i>                   | Boreoeutheria         | AAPE02000394.1                      |                       |
|                                       | <i>Nomascus leucogenys</i>                | Boreoeutheria         | ADRV01187285.1                      |                       |
|                                       | <i>Ochotona princeps</i>                  | Boreoeutheria         | ENSOPRP00000013878                  |                       |
|                                       | <i>Ornithorhynchus anatinus</i>           | Monotremata           | ENSOANP00000008669                  |                       |
|                                       | <i>Oryctolagus cuniculus</i>              | Boreoeutheria         | XP_002713990.1                      |                       |
|                                       | <i>Otolemur garnettii</i>                 | Boreoeutheria         | AAQR03059801.1                      |                       |
| <i>Pan troglodytes</i>                | Boreoeutheria                             | XP_526970.2           |                                     |                       |
| <i>Procvia capensis</i>               | Afrotheria                                | ABRQ01101301.1        |                                     |                       |
| <i>Pteropus vampyrus</i>              | Boreoeutheria                             | ENSPVAP00000005752    |                                     |                       |
| <i>Rattus norvegicus</i>              | Boreoeutheria                             | NP_001020183.1        |                                     |                       |
| <i>Sarcophilus harrisii</i>           | Marsupialia                               | AFEY01228897.1        |                                     |                       |
| <i>Taeniopygia guttata</i>            | Sauropsida                                | ENSTGUP00000000950    | Z                                   |                       |
| <i>Trichechus manatus latirostris</i> | Afrotheria                                | AHIN01042750.1        |                                     |                       |
| <i>Tursiops truncatus</i>             | Boreoeutheria                             | ENSTTRP00000000995    |                                     |                       |
| <b>GIN2</b>                           | <i>Callorhynchus milii</i>                | Chondrichthyes        | AAVX01272723.1                      |                       |
|                                       | <i>Danio rerio</i>                        | Actinopterygii        | CABZ01030983.1                      |                       |
|                                       | <i>Gallus gallus</i>                      | Sauropsida            | ENSGALT00000005860                  |                       |
|                                       | <i>Latimeria chalumnae</i>                | Coelacanthimorph<br>a | ENSLACT00000020312                  |                       |
|                                       | <i>Macropus eugenii</i>                   | Marsupialia           | ABQO020016960.1                     |                       |
|                                       | <i>Meleagris gallopavo</i>                | Sauropsida            | ENSMGAT00000003941                  |                       |
|                                       | <i>Sarcophilus harrisii</i>               | Marsupialia           | AFEY01377517.1                      |                       |
|                                       | <i>Taeniopygia guttata</i>                | Sauropsida            | ABQF01047089.1                      |                       |
|                                       | <i>Takifugu rubripes</i>                  | Actinopterygii        | CAAB02000649.1                      |                       |
|                                       | <i>Xenopus tropicalis</i>                 | Amphibia              | AAMC01042891.1                      |                       |
| <b>GIN-like</b>                       | <i>Branchiostoma floridae</i>             | Cephalochordata       | ABEP01009594                        |                       |
|                                       | <i>Branchiostoma floridae</i>             | Cephalochordata       | ABEP02009093.1                      |                       |

|               |                                       |               |                    |              |
|---------------|---------------------------------------|---------------|--------------------|--------------|
|               | <i>Ciona intestinalis</i>             | Urochordata   | ENSCINT00000034809 |              |
|               | <i>Petromyzon marinus</i>             | Cyclostomata  | ENSPMAT00000009777 |              |
|               | <i>Petromyzon marinus</i>             | Cyclostomata  | ENSPMAT00000009777 |              |
| <b>SCAND3</b> | <i>Ailuropoda melanoleuca</i>         | Boreoeutheria | ACTA01148370.1     |              |
|               | <i>Bos taurus</i>                     | Boreoeutheria | XP_002702938.1     |              |
|               | <i>Callithrix jacchus</i>             | Boreoeutheria | ACFV01153170.1     |              |
|               | <i>Canis lupus familiaris</i>         | Boreoeutheria | XP_545451.2        |              |
|               | <i>Choloepus hoffmanni</i>            | Xenarthra     | ABVD01519353.1     |              |
|               | <i>Dasybus novemcinctus</i>           | Xenarthra     | AAGV03013662.1     |              |
|               | <i>Daubentonia madagascariensis</i>   | Boreoeutheria | AGTM011946033.1    |              |
|               | <i>Equus caballus</i>                 | Boreoeutheria | XP_001504928.1     |              |
|               | <i>Felis catus</i>                    | Boreoeutheria | ACBE01158435.1     |              |
|               | <i>Gorilla gorilla</i>                | Boreoeutheria | CABD02313941.1     |              |
|               | <i>Homo sapiens</i>                   | Boreoeutheria | NP_443155.1        | 6 (6p22.1)   |
|               | <i>Ictidomys tridecemlineatus</i>     | Boreoeutheria | AGTP01117005.1     |              |
|               | <i>Macaca mulatta</i>                 | Boreoeutheria | XP_001101327.1     |              |
|               | <i>Macropus eugenii</i>               | Marsupialia   | ABQO020574066.1    |              |
|               | <i>Mustela putorius furo</i>          | Boreoeutheria | AGTQ01007431.1     |              |
|               | <i>Nomascus leucogenys</i>            | Boreoeutheria | ADFV01069104.1     |              |
|               | <i>Otolemur garnettii</i>             | Boreoeutheria | AAQR03175422.1     |              |
|               | <i>Ovis aries</i>                     | Boreoeutheria | ACIV011864315.1    |              |
|               | <i>Pan troglodytes</i>                | Boreoeutheria | XP_527300.2        |              |
|               | <i>Pongo abelii</i>                   | Boreoeutheria | XP_002816663.1     |              |
|               | <i>Procavia capensis</i>              | Afrotheria    | ABRQ01339340.1     |              |
|               | <i>Spermophilus tridecemlineatus</i>  | Boreoeutheria | AAQQ01268141       |              |
|               | <i>Sus scrofa</i>                     | Boreoeutheria | XP_003128285.1     |              |
|               | <i>Trichechus manatus latirostris</i> | Afrotheria    | AHIN01123797.1     |              |
|               | <i>Tursiops truncatus</i>             | Boreoeutheria | ABRN02152968.1     |              |
| <b>KRBA2</b>  | <i>Ailuropoda melanoleuca</i>         | Boreoeutheria | ACTA01016012.1     |              |
|               | <i>Bos taurus</i>                     | Boreoeutheria | XP_002702194.1     |              |
|               | <i>Callithrix jacchus</i>             | Boreoeutheria | XP_002806845.1     |              |
|               | <i>Canis lupus familiaris</i>         | Boreoeutheria | XP_003434716.1     |              |
|               | <i>Choloepus hoffmanni</i>            | Xenarthra     | ABVD01164029.1     |              |
|               | <i>Dasybus novemcinctus</i>           | Xenarthra     | AAGV03120505.1     |              |
|               | <i>Daubentonia madagascariensis</i>   | Boreoeutheria | AGTM011803390.1    |              |
|               | <i>Equus caballus</i>                 | Boreoeutheria | XP_001503262.2     |              |
|               | <i>Felis catus</i>                    | Boreoeutheria | ACBE01571589.1     |              |
|               | <i>Gorilla gorilla</i>                | Boreoeutheria | CABD02146056.1     |              |
|               | <i>Homo sapiens</i>                   | Boreoeutheria | NP_998762.1        | 17 (17p13.1) |
|               | <i>Loxodonta africana</i>             | Afrotheria    | AAGU03065723.1 *   |              |
|               | <i>Macaca mulatta</i>                 | Boreoeutheria | XP_001113012.1     |              |
|               | <i>Microcebus murinus</i>             | Boreoeutheria | ABDC01211585.1     |              |
|               | <i>Mustela putorius furo</i>          | Boreoeutheria | AEYP01050843.1     |              |
|               | <i>Myotis lucifugus</i>               | Boreoeutheria | AAPE02045206.1 *   |              |
|               | <i>Nomascus leucogenys</i>            | Boreoeutheria | XP_003274599.1     |              |
|               | <i>Ovis aries</i>                     | Boreoeutheria | ACIV011623187.1    |              |
|               | <i>Pan troglodytes</i>                | Boreoeutheria | AACZ03107953.1     |              |
|               | <i>Pongo abelii</i>                   | Boreoeutheria | NP_001127348.1     |              |
|               | <i>Sarcophilus harrisii</i>           | Marsupialia   | AEFK01165105.1     |              |
|               | <i>Sus scrofa</i>                     | Boreoeutheria | XP_003358333.1     |              |
|               | <i>Trichechus manatus latirostris</i> | Afrotheria    | AHIN01050211.1 *   |              |
|               | <i>Trichosurus vulpecula</i>          | Marsupialia   | DY605310.1         |              |
|               | <i>Vicugna pacos</i>                  | Boreoeutheria | ABRR01279825.1     |              |
| <b>NYNRIN</b> | <i>Homo sapiens</i>                   | Boreoeutheria | NP_079357.2        | 14 (14q12)   |
|               | <i>Mus musculus</i>                   | Boreoeutheria | NP_001035161.1     |              |
|               | <i>Pongo abelii</i>                   | Boreoeutheria | XP_002824664.1     |              |
|               | <i>Pan troglodytes</i>                | Boreoeutheria | XP_509877.2        |              |
|               | <i>Macaca mulatta</i>                 | Boreoeutheria | XP_001104789.2     |              |
|               | <i>Equus caballus</i>                 | Boreoeutheria | ENSECAP00000014240 |              |

---

|                                       |               |                    |
|---------------------------------------|---------------|--------------------|
| <i>Canis lupus familiaris</i>         | Boreoeutheria | XP_547747.3        |
| <i>Oryctolagus cuniculus</i>          | Boreoeutheria | XP_002718154.1     |
| <i>Bos taurus</i>                     | Boreoeutheria | NP_001179388.1     |
| <i>Monodelphis domestica</i>          | Marsupialia   | XP_001380281.1     |
| <i>Loxodonta africana</i>             | Afrotheria    | XP_003421016.1     |
| <i>Cavia porcellus</i>                | Boreoeutheria | XP_003474331.1     |
| <i>Myotis lucifugus</i>               | Boreoeutheria | ENSMLUP00000010277 |
| <i>Trichechus manatus latirostris</i> | Afrotheria    | AHIN01147338.1     |
| <i>Procuria capensis</i>              | Afrotheria    | ABRQ01414840.1     |
| <i>Echinops telfairi</i>              | Afrotheria    | AAIY01153771.1     |
| <i>Dasyus novemcinctus</i>            | Xenarthra     | AAGV03121121.1     |
| <i>Choloepus hoffmanni</i>            | Xenarthra     | ABVD01872789.1     |
| <i>Sarcophilus harrisii</i>           | Marsupialia   | AEFK01009009.1     |
| <i>Macropus eugenii</i>               | Marsupialia   | ABQO020422001.1    |
| <i>Pteropus vampyrus</i>              | Boreoeutheria | ABRP01121463.1     |
| <i>Felis catus</i>                    | Boreoeutheria | AANG02157131.1     |
| <i>Tursiops truncatus</i>             | Boreoeutheria | ABRN02279328.1     |
| <i>Mustela putorius furo</i>          | Boreoeutheria | AGTQ01027410.1     |
| <i>Ailuropoda melanoleuca</i>         | Boreoeutheria | ACTA01019458.1     |
| <i>Gorilla gorilla</i>                | Boreoeutheria | CABD02105976.1     |
| <i>Callithrix jacchus</i>             | Boreoeutheria | XP_002753733.1     |
| <i>Nomascus leucogenys</i>            | Boreoeutheria | XP_003260748.1     |
| <i>Ictidomys tridecemlineatus</i>     | Boreoeutheria | AGTP01099316.1     |
| <i>Otolemur garnettii</i>             | Boreoeutheria | AAQR03175878.1     |
| <i>Microcebus murinus</i>             | Boreoeutheria | ABDC01231164.1     |
| <i>Heterocephalus glaber</i>          | Boreoeutheria | EHB07434.1         |
| <i>Tupaia belangeri</i>               | Boreoeutheria | AAPY01734038.1     |
| <i>Dipodomys ordii</i>                | Boreoeutheria | ABRO01178620.1     |

---

| Gene   | Organism                          | Taxonomic group | Protein/nucleotide accession number | Chromosome (location) |
|--------|-----------------------------------|-----------------|-------------------------------------|-----------------------|
| ASPRV1 | <i>Ailuropoda melanoleuca</i>     | Boreoeutheria   | ACTA01176775.1                      |                       |
|        | <i>Bos taurus</i>                 | Boreoeutheria   | DAAA02031529.1                      |                       |
|        | <i>Callithrix jacchus</i>         | Boreoeutheria   | ACFV01110198.1                      |                       |
|        | <i>Canis lupus familiaris</i>     | Boreoeutheria   | AAEX03007628.1                      |                       |
|        | <i>Cavia porcellus</i>            | Boreoeutheria   | AAKN02036909.1                      |                       |
|        | <i>Choloepus hoffmanni</i>        | Xenarthra       | ABVD01643553                        |                       |
|        | <i>Dasyopus novemcinctus</i>      | Xenarthra       | AAGV03143624.1                      |                       |
|        | <i>Equus caballus</i>             | Boreoeutheria   | AAWR02003737.1                      |                       |
|        | <i>Felis catus</i>                | Boreoeutheria   | AANG02143111                        |                       |
|        | <i>Gorilla gorilla</i>            | Boreoeutheria   | CABD02193978.1                      |                       |
|        | <i>Heterocephalus glaber</i>      | Boreoeutheria   | AFSB01223045.1                      |                       |
|        | <i>Homo sapiens</i>               | Boreoeutheria   | NP_690005.2                         | 2 (2p13.3)            |
|        | <i>Ictidomys tridecemlineatus</i> | Boreoeutheria   | AAQQ01029984.1                      |                       |
|        | <i>Loxodonta africana</i>         | Afrotheria      | AAGU03051431.1                      |                       |
|        | <i>Macaca mulatta</i>             | Boreoeutheria   | AANU01291061.1                      |                       |
|        | <i>Macropus eugenii</i>           | Marsupialia     | ABQO021096366.1                     |                       |
|        | <i>Microcebus murinus</i>         | Boreoeutheria   | ABDC01048367.1                      |                       |
|        | <i>Monodelphis domestica</i>      | Marsupialia     | AAFR03004014.1                      |                       |
|        | <i>Mus musculus</i>               | Boreoeutheria   | NP_080690.2                         |                       |
|        | <i>Mustela putorius furo</i>      | Boreoeutheria   | AEYP01010392.1                      |                       |
|        | <i>Myotis lucifugus</i>           | Boreoeutheria   | AAPE02025611.1                      |                       |
|        | <i>Nomascus leucogenys</i>        | Boreoeutheria   | ADFV01010511.1                      |                       |
|        | <i>Ochotona princeps</i>          | Boreoeutheria   | AAYZ01083901                        |                       |
|        | <i>Ornithorhynchus anatinus</i>   | Monotremata     | AAPN01199678.1                      |                       |
|        | <i>Oryctolagus cuniculus</i>      | Boreoeutheria   | AAGW02006848.1                      |                       |
|        | <i>Otolemur garnettii</i>         | Boreoeutheria   | AAQR03102198.1                      |                       |
|        | <i>Pan troglodytes</i>            | Boreoeutheria   | AADA01178871.1                      |                       |
|        | <i>Pongo abelii</i>               | Boreoeutheria   | ABGA01353826.1                      |                       |
|        | <i>Pteropus vampyrus</i>          | Boreoeutheria   | ABRP01166574.1                      |                       |
|        | <i>Rattus norvegicus</i>          | Boreoeutheria   | EDL91253.1                          |                       |
|        | <i>Sarcophilus harrisii</i>       | Marsupialia     | AFEY01388655.1                      |                       |
|        | <i>Tursiops truncatus</i>         | Boreoeutheria   | ABRN02331053.1                      |                       |
|        | <i>Vicugna pacos</i>              | Boreoeutheria   | ABRR01436695.1                      |                       |

| Gene       | Organism                                  | Taxonomic group | Protein/nucleotide accession number | Chromosome (location) |
|------------|-------------------------------------------|-----------------|-------------------------------------|-----------------------|
| <b>ARC</b> |                                           |                 |                                     |                       |
|            | <i>Ailuropoda melanoleuca</i>             | Boreoeutheria   | ACTA01148197.1                      |                       |
|            | <i>Anolis carolinensis</i>                | Sauropsida      | AAWZ02020354.1                      |                       |
|            | <i>Bos taurus</i>                         | Boreoeutheria   | NP_001193336.1                      |                       |
|            | <i>Callithrix jacchus</i>                 | Boreoeutheria   | ACFV01185911.1                      |                       |
|            | <i>Canis lupus familiaris</i>             | Boreoeutheria   | AACN010440983.1                     |                       |
|            | <i>Cavia porcellus</i>                    | Boreoeutheria   | AAKN02023196.1                      |                       |
|            | <i>Chrysemys picta bellii</i>             | Sauropsida      | AHGY01086810.1                      |                       |
|            | <i>Dasyops novemcinctus</i>               | Xenarthra       | AAGV03311726.1                      |                       |
|            | <i>Gallus gallus</i>                      | Sauropsida      | NP_989763.1                         |                       |
|            | <i>Gorilla gorilla</i>                    | Boreoeutheria   | CABD02372626.1                      |                       |
|            | <i>Heterocephalus glaber</i>              | Boreoeutheria   | AFSB01232674.1                      |                       |
|            | <i>Homo sapiens</i>                       | Boreoeutheria   | NP_056008.1                         | 8 (8q24.3)            |
|            | <i>Ictidomys tridecemlineatus</i>         | Boreoeutheria   | AGTP01001239.1                      |                       |
|            | <i>Loxodonta africana</i>                 | Afrotheria      | AAGU03089166.1                      |                       |
|            | <i>Macaca mulatta</i>                     | Boreoeutheria   | AANU01107068.1                      |                       |
|            | <i>Macropus eugenii</i>                   | Marsupialia     | ABQO020225819.1                     |                       |
|            | <i>Meleagris gallopavo</i>                | Sauropsida      | XP_003205366.1                      |                       |
|            | <i>Melopsittacus undulatus budgerigar</i> | Sauropsida      | AGAI01032183.1                      |                       |
|            | <i>Monodelphis domestica</i>              | Marsupialia     | AAFR03005662.1                      |                       |
|            | <i>Mus musculus</i>                       | Boreoeutheria   | NP_061260.1                         |                       |
|            | <i>Mustela putorius furo</i>              | Boreoeutheria   | AEYP01014255.1                      |                       |
|            | <i>Nomascus leucogenys</i>                | Boreoeutheria   | ADFV01097265.1                      |                       |
|            | <i>Ornithorhynchus anatinus</i>           | Monotremata     | AAPN01117397.1                      |                       |
|            | <i>Otolemur garnettii</i>                 | Boreoeutheria   | AAQR03184588.1                      |                       |
|            | <i>Pan troglodytes</i>                    | Boreoeutheria   | XP_528245.2                         |                       |
|            | <i>Pongo abelii</i>                       | Boreoeutheria   | ABGA01006600.1                      |                       |
|            | <i>Procavia capensis</i>                  | Afrotheria      | ABRQ01626709.1                      |                       |
|            | <i>Pteropus vampyrus</i>                  | Boreoeutheria   | ABRP01297506.1                      |                       |
|            | <i>Python molurus</i>                     | Sauropsida      | AEQU010333076.1                     |                       |
|            | <i>Rattus norvegicus</i>                  | Boreoeutheria   | NP_062234.1                         |                       |
|            | <i>Saimiri boliviensis</i>                | Boreoeutheria   | AGCE01132459.1                      |                       |
|            | <i>Sarcophilus harrisii</i>               | Marsupialia     | AFEY01455681                        |                       |
|            | <i>Sorex araneus</i>                      | Boreoeutheria   | AALT01329681.1                      |                       |
|            | <i>Taeniopygia guttata</i>                | Sauropsida      | ABQF01048364.1                      |                       |
|            | <i>Trichechus manatus latirostris</i>     | Afrotheria      | AHIN01125499.1                      |                       |
|            | <i>Tursiops truncatus</i>                 | Boreoeutheria   | ABRN02468085.1                      |                       |
|            | <i>Xenopus tropicalis</i>                 | Amphibia        | AAMC01034049.1                      |                       |

\* Incomplete/ pseudogene sequence

**Supplementary Table S2. Distribution of Metaviridae clades in Tetrapoda.**

| Metaviridae clade | Sauropsida   |         |                          |                     | Mammals     |        | Ancestral states |           |         |           |
|-------------------|--------------|---------|--------------------------|---------------------|-------------|--------|------------------|-----------|---------|-----------|
|                   | Lepidosauria | Turtles | Archosauria (crocodiles) | Archosauria (birds) | Prototheria | Theria | Sauropsida       | Synapsida | Amniota | Tetrapoda |
| Chromovirus       | +            | *       | *                        | Δ                   | Δ           | Δ      | +                | +         | +       | +         |
| Cigr2             | Δ            | Δ       | +                        | Δ                   | Δ           | Δ      | +                | +         | +       | +         |
| Barthez           | Δ            | +       | +                        | Δ                   | Δ           | Δ      | +                | +         | +       | +         |
| Gmr1              | +            | +       | +                        | Δ                   | Δ           | Δ      | +                | +         | +       | +         |
| new Mag           | Δ            | +       | Δ                        | Δ                   | Δ           | Δ      | +                | +         | +       | +         |
| SURL              | +            | +       | +                        | Δ                   | Δ           | Δ      | +                | +         | +       | +         |
| Mag               | +            | +       | +                        | Δ                   | Δ           | Δ      | +                | +         | +       | +         |

+: full length elements present, Δ: elements absent, \*: corrupted elements (retroelement remains)



**Supplementary Table S3. Diverse phenotypic roles of RDDGs.**

| Family          | Gene               | Gene/protein properties and/or function                                                                                                                                                                                                                                                                                                                                                            | References                                                                          |
|-----------------|--------------------|----------------------------------------------------------------------------------------------------------------------------------------------------------------------------------------------------------------------------------------------------------------------------------------------------------------------------------------------------------------------------------------------------|-------------------------------------------------------------------------------------|
| <b>SUSHI</b>    | <i>PEG10</i>       | Paternally expressed. Essential for placenta development. Overexpressed in different carcinomas. Interacts with ALK1 (TGF-beta receptor) and SIAH1 (mediator of apoptosis).                                                                                                                                                                                                                        | <i>Ono et al. 2001; Okabe et al. 2003; Ono et al. 2006; Lux et al. 2005</i>         |
|                 | <i>RGAG1</i>       | Down-regulated in testicular cancer                                                                                                                                                                                                                                                                                                                                                                | <i>Cheung et al. 2010</i>                                                           |
|                 | <i>RGAG4</i>       | Unknown                                                                                                                                                                                                                                                                                                                                                                                            |                                                                                     |
|                 | <i>RTL1</i>        | Paternally expressed. Has maternally expressed antisense transcript coding for several miRNAs targeting the RTL1 transcript. RTL1 is essential for maintenance of the fetal capillaries and establishment of fetomaternal interface. Its loss or overproduction cause late fetal or neonatal lethality in mice.                                                                                    | <i>Seitz et al. 2003; Davis et al. 2005; Sekita et al. 2008</i>                     |
|                 | <i>ZCCHC5</i>      | Unknown                                                                                                                                                                                                                                                                                                                                                                                            |                                                                                     |
|                 | <i>ZCCHC16</i>     | Unknown                                                                                                                                                                                                                                                                                                                                                                                            |                                                                                     |
|                 | <i>LDOC1</i>       | Negative regulator of nuclear factor kappa B (NF-κB) signal transduction pathway. Induces apoptosis. CNS co-expression interaction network hub gene.                                                                                                                                                                                                                                               | <i>Nagasaki et al. 2003; Inoue et al. 2005, Oldham et al. 2006</i>                  |
|                 | <i>LDOC1L</i>      | Unknown                                                                                                                                                                                                                                                                                                                                                                                            |                                                                                     |
|                 | <i>FAM127a/b/c</i> | Proliferation related gene (fam127a)                                                                                                                                                                                                                                                                                                                                                               | <i>Parisi et al. 2009</i>                                                           |
|                 | <i>C22orf29</i>    | Unknown                                                                                                                                                                                                                                                                                                                                                                                            |                                                                                     |
|                 | <i>SIRH12</i>      | Unknown                                                                                                                                                                                                                                                                                                                                                                                            |                                                                                     |
|                 | <b>PNMA</b>        | <i>PNMA1</i>                                                                                                                                                                                                                                                                                                                                                                                       | Neuronal pro-apoptotic protein                                                      |
| <i>PNMA2</i>    |                    | Unknown                                                                                                                                                                                                                                                                                                                                                                                            |                                                                                     |
| <i>PNMA3</i>    |                    | Unknown                                                                                                                                                                                                                                                                                                                                                                                            |                                                                                     |
| <i>MOAP1</i>    |                    | Induction of apoptosis. Interacts with BAX, BCL2, BCL2L1 and RASSF1A.                                                                                                                                                                                                                                                                                                                              | <i>Tan et al. 2001; Baksh et al. 2005</i>                                           |
| <i>PNMA5</i>    |                    | Enriched expression in prefrontal and sensory association areas of neocortex.                                                                                                                                                                                                                                                                                                                      | <i>Takaji et al. 2009</i>                                                           |
| <i>PNMA6a/b</i> |                    | Unknown                                                                                                                                                                                                                                                                                                                                                                                            |                                                                                     |
| <i>ZCCHC12</i>  |                    | Transcriptional co-activator of BMP signaling. Interacts with CBP. ZCCHC12 localizes to PML nuclear bodies.                                                                                                                                                                                                                                                                                        | <i>Cho et al. 2008; Cho et al. 2009</i>                                             |
| <i>ZCCHC18</i>  |                    | Unknown                                                                                                                                                                                                                                                                                                                                                                                            |                                                                                     |
| <i>PNMAL1</i>   |                    | Up-regulated in human spermatogonia and mouse gonocytes cells                                                                                                                                                                                                                                                                                                                                      | <i>Wu et al. 2009</i>                                                               |
| <i>PNMAL2</i>   |                    | Unknown                                                                                                                                                                                                                                                                                                                                                                                            |                                                                                     |
| <i>CCDC8</i>    |                    | Interacts with OBSL1. Mutations in CCDC8 cause 3-M syndrome. Involved in the growth control pathway in mammals. Localizes at plasma membrane and neurite tips. Overexpression increases the number of neurites per cell. Interacts with p53. Inactivation of CCDC8 down-regulates p53-mediated PUMA activation upon DNA damage. Interacts with Tip60 acetyltransferase and promotes Tip60-mediated | <i>Laketa et al. 2006; Hanson et al. 2011; Dai et al. 2011; Drucker et al. 2009</i> |

acetylation of p53 at K120.

---

|            |                                                                 |                                                                                                                                                                                                                                                                                                                 |                                                                                                                     |
|------------|-----------------------------------------------------------------|-----------------------------------------------------------------------------------------------------------------------------------------------------------------------------------------------------------------------------------------------------------------------------------------------------------------|---------------------------------------------------------------------------------------------------------------------|
| <b>ARC</b> | <i>ARC</i>                                                      | Modulates synaptic plasticity. Involved in the process of consolidation of long-term potentiation (LPT) and long-term depression (LTD) through modulation of actin cytoskeletal dynamics and regulation of AMPA-type glutamate receptor endocytosis, respectively. Essential for long-term memory and learning. | <i>Lyford et al. 1995; Plath et al. 2006; Shepherd et al. 2006; Chowdhury et al. 2006; Korb and Finkbeiner 2011</i> |
| <b>RVE</b> | <i>GIN1/2</i><br><i>NYNRIN</i><br><i>SCAND3</i><br><i>KRAB2</i> | Unknown<br>Unknown<br>Down-regulated during mouse embryonic stem cell (ES) differentiation<br>Unknown                                                                                                                                                                                                           | <i>Makeyev and Bayarsaihan 2009</i>                                                                                 |
| <b>PRO</b> | <i>ASPRV1</i>                                                   | Aspartic protease expressed in epidermis. It is involved in the processing of profilaggrin and maintaining the texture and hydration of the stratum corneum.                                                                                                                                                    | <i>Bernard et al. 2005; Matsui et al. 2011</i>                                                                      |

---

**Supplementary Table S4. Structure and properties of RDDGs.**

| Gene     | Organism          | Protein length | Transcript length | Introns (coding) | Introns (5'/3' UTR) | Gene structure | -1 frame shift |
|----------|-------------------|----------------|-------------------|------------------|---------------------|----------------|----------------|
| PEG10    | <i>H. sapiens</i> | 708            | 6628              | 0                | 1/0                 | Cpd-Zf-RVP     | Yes            |
| RGAG1    | <i>H. sapiens</i> | 1388           | 5426              | 1                | 2/0                 | Cpd            | No             |
| RGAG4    | <i>H. sapiens</i> | 569            | 4339              | 0                | 0/1                 | Cpd            | No             |
| RTL1     | <i>H. sapiens</i> | 1358           | 4319              | 0                | 0/0                 | Cpd-RVP-RT     | No             |
| ZCCHC5   | <i>H. sapiens</i> | 475            | 2648              | 0                | 1/0                 | Cpd-Zf         | No             |
| ZCCHC16  | <i>H. sapiens</i> | 310            | 2958              | 0                | 2/0                 | Cpd-Zf         | No             |
| LDOC1    | <i>H. sapiens</i> | 146            | 1370              | 0                | 0/0                 | N-terminal Cpd | No             |
| LDOC1L   | <i>H. sapiens</i> | 239            | 5495              | 0                | 1/0                 | N-terminal Cpd | No             |
| FAM127a  | <i>H. sapiens</i> | 113            | 1236              | 0                | 0/0                 | N-terminal Cpd | No             |
| FAM127b  | <i>H. sapiens</i> | 113            | 1244              | 0                | 0/0                 | N-terminal Cpd | No             |
| FAM127c  | <i>H. sapiens</i> | 113            | 2017              | 0                | 0/0                 | N-terminal Cpd | No             |
| C22orf29 | <i>H. sapiens</i> | 364            | 6619              | 0                | 2/0                 | N-terminal Cpd | No             |
| SIRH12   | <i>M. eugenii</i> | 107            | N/A               | 0                | N/A                 | N-terminal Cpd | No             |
| PNMA1    | <i>H. sapiens</i> | 353            | 2635              | 0                | 0/0                 | Mtx-Cpd        | No             |
| PNMA2    | <i>H. sapiens</i> | 364            | 4950              | 0                | 2/0                 | Mtx-Cpd        | No             |
| PNMA3    | <i>H. sapiens</i> | 455            | 3630              | 1                | 1/0                 | Mtx-Cpd-Zf     | Yes            |
| MOAP1    | <i>H. sapiens</i> | 351            | 2441              | 0                | 2/0                 | Mtx-Cpd        | No             |
| PNMA5    | <i>H. sapiens</i> | 448            | 3197              | 0                | 1-3/0               | Mtx-Cpd        | Yes            |
| PNMA6a/b | <i>H. sapiens</i> | 399            | 2236              | 0                | 1/0                 | Mtx-Cpd        | No             |
| ZCCHC12  | <i>H. sapiens</i> | 402            | 2231              | 0                | 3/0                 | Cpd-Zf         | No             |
| ZCCHC18  | <i>H. sapiens</i> | 403            | 3045              | 0                | 2/0                 | Cpd-Zf         | No             |
| PNMAL1   | <i>H. sapiens</i> | 439            | 3689              | 1                | 1/0                 | Mtx            | No             |
| PNMAL2   | <i>H. sapiens</i> | 279            | 1726              | 1                | 0/0                 | Mtx            | No             |
| CCDC8    | <i>H. sapiens</i> | 538            | 3213              | 0                | 0/0                 | C-terminal Mtx | No             |
| M-PNMA   | <i>M. eugenii</i> | 458            | N/A               | 0                | N/A                 | Mtx-Cpd-Zf     | ?              |
| ARC      | <i>H. sapiens</i> | 396            | 2943              | 0                | 0/2                 | Mtx-Cpd        | No             |
| ASPRV1   | <i>H. sapiens</i> | 343            | 2172              | 0                | 0/0                 | RVP            | No             |
| GIN1     | <i>H. sapiens</i> | 522            | 3229              | 6                | 1/0                 | Zf-INT         | No             |
| GIN2     | <i>G. gallus</i>  | 422            | 1809              | 7                | ?/0                 | INT            | No             |
| NYNRIN   | <i>H. sapiens</i> | 1898           | 7857              | 7                | 1/0                 | NYN-INT        | No             |
| KRBA2    | <i>H. sapiens</i> | 492            | 1964              | 1                | 0/0                 | KRAB-INT       | No             |
| SCAND3   | <i>H. sapiens</i> | 1325           | 4877              | 3                | 0/0                 | SCAN-INT-hAT   | No             |

Cpd: Capsid domain, Zf: Zinc finger, RVP: Retroviral aspartyl protease, RT: reverse transcriptase, Mtx: Matrix domain, INT: integrase, NYN: NYN domain, KRAB: Kruppel associated box, SCAN: SCAN domain hAT: hAT family dimerisation domain

## References

- Baksh S et al. 2005. The tumor suppressor RASSF1A and MAP-1 link death receptor signaling to Bax conformational change and cell death. *Mol Cell* 18:637-650.
- Bernard D et al. 2005. Identification and characterization of a novel retroviral-like aspartic protease specifically expressed in human epidermis. *J Invest Dermatol.* 125:278-287.
- Chen HL, D'Mello SR. 2010. Induction of neuronal cell death by paraneoplastic Ma1 antigen. *J Neurosci Res.* 88:3508-3519.
- Cheung HH et al. 2010. Genome-wide DNA methylation profiling reveals novel epigenetically regulated genes and non-coding RNAs in human testicular cancer. *Br J Cancer* 102:419–427.
- Cho G, Lim Y, Zand D, Golden JA. 2008. Szn1 is a novel protein that functions as a transcriptional coactivator of bone morphogenic protein signaling. *Mol Cell Biol.* 28:1565-1572.
- Cho G, Lim Y, Golden JA. 2009. SUMO interaction motifs in Szn1 are required for promyelocytic leukemia protein nuclear body localization and for transcriptional activation. *J Biol Chem.* 284:19592-19600.
- Chowdhury S et al. 2006. Arc/Arg3.1 interacts with the endocytic machinery to regulate AMPA receptor trafficking. *Neuron* 52:445-459.
- Dai C et al. 2011. Differential effects on p53-mediated cell cycle arrest vs. apoptosis by p90. *Proc Natl Acad Sci USA* 108:18937-18942.
- Davis E et al. 2005. RNAi-mediated allelic trans-interaction at the imprinted Rtl1/Peg11 locus. *Curr Biol.* 15:743-749.

Drucker KL et al. 2009. Characterization and gene expression profiling in glioma cell lines with deletion of chromosome 19 before and after microcell-mediated restoration of normal human chromosome 19. *Genes Chromosomes Cancer* 48:854-864

Hanson D, Murray PG, Black GC, Clayton PE. 2011. The genetics of 3-M syndrome: unravelling a potential new regulatory growth pathway. *Horm Res Paediatr.*76:369-378.

Inoue M et al. 2005. LDOC1, a novel MZF-1-interacting protein, induces apoptosis. *FEBS Lett.* 579:604-608.

Korb E, Finkbeiner S. 2011. Arc in synaptic plasticity: from gene to behavior. *Trends Neurosci.* 34:591-598.

Laketa V, Simpson JC, Bechtel S, Wiemann S, Pepperkok R. 2007. High-content microscopy identifies new neurite outgrowth regulators. *Mol Biol Cell* 18:242-252.

Lyford GL et al. 1995. Arc, a growth factor and activity-regulated gene, encodes a novel cytoskeleton-associated protein that is enriched in neuronal dendrites. *Neuron* 14:433-445.

Lux A et al. 2005. Human retroviral gag- and gag-pol-like proteins interact with the transforming growth factor-beta receptor activin receptor-like kinase 1. *J Biol Chem.* 280:8482-8493.

Makeyev AV, Bayarsaihan D. 2009. New TFII-I family target genes involved in embryonic development. *Biochem Biophys Res Commun.* 386:554-558.

Matsui T et al. 2011. SASPase regulates stratum corneum hydration through profilaggrin-to-filaggrin processing. *EMBO Mol Med.* 3:320-333.

Nagasaki K et al. 2003. Leucine-zipper protein, LDOC1, inhibits NF-kappaB activation and sensitizes pancreatic cancer cells to apoptosis. *Int J Cancer* 105:454-458.

Okabe H, Satoh S, Furukawa Y, Kato T, Hasegawa S, Nakajima Y, Yamaoka Y, Nakamura Y. 2003. Involvement of PEG10 in human hepatocellular carcinogenesis through interaction with SIAH1. *Cancer Res.* 63:3043-3048.

Oldham MC, Horvath S, Geschwind DH. 2006. Conservation and evolution of gene coexpression networks in human and chimpanzee brains. *Proc Natl Acad Sci USA* 103:17973-17978.

Ono R et al. 2001. A retrotransposon-derived gene, PEG10, is a novel imprinted gene located on human chromosome 7q21. *Genomics* 73:232-237.

Ono R et al. 2006. Deletion of Peg10, an imprinted gene acquired from a retrotransposon, causes early embryonic lethality. *Nat Genet.* 38:101-106.

Parisi F, Sonderegger B, Wirapati P, Delorenzi M, Naef F. 2009. Relationship between estrogen receptor alpha location and gene induction reveals the importance of downstream sites and cofactors. *BMC Genomics* 10:381.

Plath N et al. 2006. Arc/Arg3.1 is essential for the consolidation of synaptic plasticity and memories. *Neuron* 52:437-444.

Seitz H et al. 2003. Imprinted microRNA genes transcribed antisense to a reciprocally imprinted retrotransposon-like gene. *Nat Genet.* 34:261-262.

Sekita Y et al. 2008. Role of retrotransposon-derived imprinted gene, Rtl1, in the fetomaternal interface of mouse placenta. *Nat Genet.* 40:243-248.

Shepherd JD et al. 2006. Arc/Arg3.1 mediates homeostatic synaptic scaling of AMPA receptors. *Neuron* 52:475-484.

Takaji M, Komatsu Y, Watakabe A, Hashikawa T, Yamamori T. 2009. Paraneoplastic antigen-like 5 gene (PNMA5) is preferentially expressed in the association areas in a primate specific manner. *Cereb Cortex* 19:2865-2879.

Tan KO et al. 2001. MAP-1, a novel proapoptotic protein containing a BH3-like motif that associates with Bax through its Bcl-2 homology domains. *J Biol Chem.* 276:2802-2807.

Wu X et al. 2009. Prepubertal human spermatogonia and mouse gonocytes share conserved gene expression of germline stem cell regulatory molecules. Proc Natl Acad Sci USA 106:21672-21677.
